# Supplementary material for: Late Holocene temperature variability in Tasmania inferred from borehole temperature data
Source: Copernicus journal article supplement (doi:10.5194/cp-13-559-2017), 2017-06-02
Supplement: Supplementary file 1 [file KUTh_Tasmania Borehole Temperature Data.xlsx]

## Sheet: All boreholes Data 
Hole Number	Hole Name	Date Logged	Logged By	Temp Class	Temperature	Depth (m)
K26DD021	Nunamura	2008-08-01	HDR PL	Static	4.6974	1
K26DD021	Nunamura	2008-08-01	HDR PL	Static	7.6856	2
K26DD021	Nunamura	2008-08-01	HDR PL	Static	7.9418	3																	Tiberias
K26DD021	Nunamura	2008-08-01	HDR PL	Static	7.9865	4																	Runnymede
K26DD021	Nunamura	2008-08-01	HDR PL	Static	8.0438	5																	Westbury
K26DD021	Nunamura	2008-08-01	HDR PL	Static	8.2143	6																	Lemont
K26DD021	Nunamura	2008-08-01	HDR PL	Static	8.2572	7																	Macquarie
K26DD021	Nunamura	2008-08-01	HDR PL	Static	8.2824	8																	Weymouth
K26DD021	Nunamura	2008-08-01	HDR PL	Static	8.2799	9																	Temple Bar
K26DD021	Nunamura	2008-08-01	HDR PL	Static	8.1539	10																	Rocherlea
K26DD021	Nunamura	2008-08-01	HDR PL	Static	8.0388	11																	Frankford
K26DD021	Nunamura	2008-08-01	HDR PL	Static	7.9392	12																	Sorell
K26DD021	Nunamura	2008-08-01	HDR PL	Static	7.8773	13																	Native Hut
K26DD021	Nunamura	2008-08-01	HDR PL	Static	7.8304	14																	Elizabeth
K26DD021	Nunamura	2008-08-01	HDR PL	Static	7.7663	15																	Perth
K26DD021	Nunamura	2008-08-01	HDR PL	Static	7.7344	16																	Marion Bay
K26DD021	Nunamura	2008-08-01	HDR PL	Static	7.6952	17																	Fingal
K26DD021	Nunamura	2008-08-01	HDR PL	Static	7.6585	18																	Woodsdale
K26DD021	Nunamura	2008-08-01	HDR PL	Static	7.6316	19																	Charlton
K26DD021	Nunamura	2008-08-01	HDR PL	Static	7.6072	20																	Epping
K26DD021	Nunamura	2008-08-01	HDR PL	Static	7.5878	21																	Mt Nicholas
K26DD021	Nunamura	2008-08-01	HDR PL	Static	7.5659	22																	Tooms
K26DD021	Nunamura	2008-08-01	HDR PL	Static	7.5537	23																	Oatlands
K26DD021	Nunamura	2008-08-01	HDR PL	Static	7.5513	24																	Murdunna
K26DD021	Nunamura	2008-08-01	HDR PL	Static	7.5464	25
K26DD021	Nunamura	2008-08-01	HDR PL	Static	7.5464	26
K26DD021	Nunamura	2008-08-01	HDR PL	Static	7.5464	27
K26DD021	Nunamura	2008-08-01	HDR PL	Static	7.5464	28
K26DD021	Nunamura	2008-08-01	HDR PL	Static	7.5463	29
K26DD021	Nunamura	2008-08-01	HDR PL	Static	7.556	30
K26DD021	Nunamura	2008-08-01	HDR PL	Static	7.5657	31
K26DD021	Nunamura	2008-08-01	HDR PL	Static	7.5682	32
K26DD021	Nunamura	2008-08-01	HDR PL	Static	7.5779	33
K26DD021	Nunamura	2008-08-01	HDR PL	Static	7.5827	34
K26DD021	Nunamura	2008-08-01	HDR PL	Static	7.5973	35
K26DD021	Nunamura	2008-08-01	HDR PL	Static	7.6168	36
K26DD021	Nunamura	2008-08-01	HDR PL	Static	7.6338	37
K26DD021	Nunamura	2008-08-01	HDR PL	Static	7.6534	38
K26DD021	Nunamura	2008-08-01	HDR PL	Static	7.668	39
K26DD021	Nunamura	2008-08-01	HDR PL	Static	7.6827	40
K26DD021	Nunamura	2008-08-01	HDR PL	Static	7.7022	41
K26DD021	Nunamura	2008-08-01	HDR PL	Static	7.7218	42
K26DD021	Nunamura	2008-08-01	HDR PL	Static	7.7414	43
K26DD021	Nunamura	2008-08-01	HDR PL	Static	7.7709	44
K26DD021	Nunamura	2008-08-01	HDR PL	Static	7.7807	45
K26DD021	Nunamura	2008-08-01	HDR PL	Static	7.8004	46
K26DD021	Nunamura	2008-08-01	HDR PL	Static	7.8176	47
K26DD021	Nunamura	2008-08-01	HDR PL	Static	7.8398	48
K26DD021	Nunamura	2008-08-01	HDR PL	Static	7.8595	49
K26DD021	Nunamura	2008-08-01	HDR PL	Static	7.8818	50
K26DD021	Nunamura	2008-08-01	HDR PL	Static	7.9164	51
K26DD021	Nunamura	2008-08-01	HDR PL	Static	7.9338	52
K26DD021	Nunamura	2008-08-01	HDR PL	Static	7.9586	53
K26DD021	Nunamura	2008-08-01	HDR PL	Static	7.981	54
K26DD021	Nunamura	2008-08-01	HDR PL	Static	8.0058	55
K26DD021	Nunamura	2008-08-01	HDR PL	Static	8.0333	56
K26DD021	Nunamura	2008-08-01	HDR PL	Static	8.0557	57
K26DD021	Nunamura	2008-08-01	HDR PL	Static	8.0907	58
K26DD021	Nunamura	2008-08-01	HDR PL	Static	8.1208	59
K26DD021	Nunamura	2008-08-01	HDR PL	Static	8.1408	60
K26DD021	Nunamura	2008-08-01	HDR PL	Static	8.1609	61
K26DD021	Nunamura	2008-08-01	HDR PL	Static	8.1835	62
K26DD021	Nunamura	2008-08-01	HDR PL	Static	8.2037	63
K26DD021	Nunamura	2008-08-01	HDR PL	Static	8.2314	64
K26DD021	Nunamura	2008-08-01	HDR PL	Static	8.2642	65
K26DD021	Nunamura	2008-08-01	HDR PL	Static	8.2895	66
K26DD021	Nunamura	2008-08-01	HDR PL	Static	8.3072	67
K26DD021	Nunamura	2008-08-01	HDR PL	Static	8.3528	68
K26DD021	Nunamura	2008-08-01	HDR PL	Static	8.4036	69
K26DD021	Nunamura	2008-08-01	HDR PL	Static	8.4266	70
K26DD021	Nunamura	2008-08-01	HDR PL	Static	8.4342	71
K26DD021	Nunamura	2008-08-01	HDR PL	Static	8.4751	72
K26DD021	Nunamura	2008-08-01	HDR PL	Static	8.493	73
K26DD021	Nunamura	2008-08-01	HDR PL	Static	8.5058	74
K26DD021	Nunamura	2008-08-01	HDR PL	Static	8.5237	75
K26DD021	Nunamura	2008-08-01	HDR PL	Static	8.5468	76
K26DD021	Nunamura	2008-08-01	HDR PL	Static	8.575	77
K26DD021	Nunamura	2008-08-01	HDR PL	Static	8.6033	78
K26DD021	Nunamura	2008-08-01	HDR PL	Static	8.6213	79
K26DD021	Nunamura	2008-08-01	HDR PL	Static	8.6291	80
K26DD021	Nunamura	2008-08-01	HDR PL	Static	8.6574	81
K26DD021	Nunamura	2008-08-01	HDR PL	Static	8.6936	82
K26DD021	Nunamura	2008-08-01	HDR PL	Static	8.7376	83
K26DD021	Nunamura	2008-08-01	HDR PL	Static	8.7636	84
K26DD021	Nunamura	2008-08-01	HDR PL	Static	8.7792	85
K26DD021	Nunamura	2008-08-01	HDR PL	Static	8.8156	86
K26DD021	Nunamura	2008-08-01	HDR PL	Static	8.8495	87
K26DD021	Nunamura	2008-08-01	HDR PL	Static	8.8756	88
K26DD021	Nunamura	2008-08-01	HDR PL	Static	8.907	89
K26DD021	Nunamura	2008-08-01	HDR PL	Static	8.941	90
K26DD021	Nunamura	2008-08-01	HDR PL	Static	8.9725	91
K26DD021	Nunamura	2008-08-01	HDR PL	Static	8.9988	92
K26DD021	Nunamura	2008-08-01	HDR PL	Static	9.0277	93
K26DD021	Nunamura	2008-08-01	HDR PL	Static	9.0779	94
K26DD021	Nunamura	2008-08-01	HDR PL	Static	9.1122	95
K26DD021	Nunamura	2008-08-01	HDR PL	Static	9.1493	96
K26DD021	Nunamura	2008-08-01	HDR PL	Static	9.1626	97
K26DD021	Nunamura	2008-08-01	HDR PL	Static	9.1759	98
K26DD021	Nunamura	2008-08-01	HDR PL	Static	9.2158	99
K26DD021	Nunamura	2008-08-01	HDR PL	Static	9.2557	100
K26DD021	Nunamura	2008-08-01	HDR PL	Static	9.3119	101
K26DD021	Nunamura	2008-08-01	HDR PL	Static	9.336	102
K26DD021	Nunamura	2008-08-01	HDR PL	Static	9.3709	103
K26DD021	Nunamura	2008-08-01	HDR PL	Static	9.3978	104
K26DD021	Nunamura	2008-08-01	HDR PL	Static	9.4193	105
K26DD021	Nunamura	2008-08-01	HDR PL	Static	9.4382	106
K26DD021	Nunamura	2008-08-01	HDR PL	Static	9.4679	107
K26DD021	Nunamura	2008-08-01	HDR PL	Static	9.4949	108
K26DD021	Nunamura	2008-08-01	HDR PL	Static	9.5193	109
K26DD021	Nunamura	2008-08-01	HDR PL	Static	9.5491	110
K26DD021	Nunamura	2008-08-01	HDR PL	Static	9.5762	111
K26DD021	Nunamura	2008-08-01	HDR PL	Static	9.6388	112
K26DD021	Nunamura	2008-08-01	HDR PL	Static	9.6579	113
K26DD021	Nunamura	2008-08-01	HDR PL	Static	9.7208	114
K26DD021	Nunamura	2008-08-01	HDR PL	Static	9.7866	115
K26DD021	Nunamura	2008-08-01	HDR PL	Static	9.8279	116
K26DD021	Nunamura	2008-08-01	HDR PL	Static	9.8665	117
K26DD021	Nunamura	2008-08-01	HDR PL	Static	9.8637	118
K26DD021	Nunamura	2008-08-01	HDR PL	Static	9.8831	119
K26DD021	Nunamura	2008-08-01	HDR PL	Static	9.908	120
K26DD021	Nunamura	2008-08-01	HDR PL	Static	9.9384	121
K26DD021	Nunamura	2008-08-01	HDR PL	Static	9.9578	122
K26DD021	Nunamura	2008-08-01	HDR PL	Static	9.9801	123
K26DD021	Nunamura	2008-08-01	HDR PL	Static	9.994	124
K26DD021	Nunamura	2008-08-01	HDR PL	Static	10.0134	125
K26DD021	Nunamura	2008-08-01	HDR PL	Static	10.0413	126
K26DD021	Nunamura	2008-08-01	HDR PL	Static	10.072	127
K26DD021	Nunamura	2008-08-01	HDR PL	Static	10.1111	128
K26DD021	Nunamura	2008-08-01	HDR PL	Static	10.1503	129
K26DD021	Nunamura	2008-08-01	HDR PL	Static	10.1924	130
K26DD021	Nunamura	2008-08-01	HDR PL	Static	10.229	131
K26DD021	Nunamura	2008-08-01	HDR PL	Static	10.26	132
K26DD021	Nunamura	2008-08-01	HDR PL	Static	10.291	133
K26DD021	Nunamura	2008-08-01	HDR PL	Static	10.3108	134
K26DD021	Nunamura	2008-08-01	HDR PL	Static	10.3448	135
K26DD021	Nunamura	2008-08-01	HDR PL	Static	10.3873	136
K26DD021	Nunamura	2008-08-01	HDR PL	Static	10.4186	137
K26DD021	Nunamura	2008-08-01	HDR PL	Static	10.4528	138
K26DD021	Nunamura	2008-08-01	HDR PL	Static	10.4813	139
K26DD021	Nunamura	2008-08-01	HDR PL	Static	10.5184	140
K26DD021	Nunamura	2008-08-01	HDR PL	Static	10.5471	141
K26DD021	Nunamura	2008-08-01	HDR PL	Static	10.5729	142
K26DD021	Nunamura	2008-08-01	HDR PL	Static	10.6073	143
K26DD021	Nunamura	2008-08-01	HDR PL	Static	10.6447	144
K26DD021	Nunamura	2008-08-01	HDR PL	Static	10.6736	145
K26DD021	Nunamura	2008-08-01	HDR PL	Static	10.7082	146
K26DD021	Nunamura	2008-08-01	HDR PL	Static	10.7371	147
K26DD021	Nunamura	2008-08-01	HDR PL	Static	10.7777	148
K26DD021	Nunamura	2008-08-01	HDR PL	Static	10.798	149
K26DD021	Nunamura	2008-08-01	HDR PL	Static	10.8387	150
K26DD021	Nunamura	2008-08-01	HDR PL	Static	10.8679	151
K26DD021	Nunamura	2008-08-01	HDR PL	Static	10.8999	152
K26DD021	Nunamura	2008-08-01	HDR PL	Static	10.9291	153
K26DD021	Nunamura	2008-08-01	HDR PL	Static	10.9613	154
K26DD021	Nunamura	2008-08-01	HDR PL	Static	11.0141	155
K26DD021	Nunamura	2008-08-01	HDR PL	Static	11.0523	156
K26DD021	Nunamura	2008-08-01	HDR PL	Static	11.0848	157
K26DD021	Nunamura	2008-08-01	HDR PL	Static	11.1172	158
K26DD021	Nunamura	2008-08-01	HDR PL	Static	11.1497	159
K26DD021	Nunamura	2008-08-01	HDR PL	Static	11.1823	160
K26DD021	Nunamura	2008-08-01	HDR PL	Static	11.212	161
K26DD021	Nunamura	2008-08-01	HDR PL	Static	11.2476	162
K26DD021	Nunamura	2008-08-01	HDR PL	Static	11.2804	163
K26DD021	Nunamura	2008-08-01	HDR PL	Static	11.3132	164
K26DD021	Nunamura	2008-08-01	HDR PL	Static	11.352	165
K26DD021	Nunamura	2008-08-01	HDR PL	Static	11.382	166
K26DD021	Nunamura	2008-08-01	HDR PL	Static	11.412	167
K26DD021	Nunamura	2008-08-01	HDR PL	Static	11.448	168
K26DD021	Nunamura	2008-08-01	HDR PL	Static	11.4841	169
K26DD021	Nunamura	2008-08-01	HDR PL	Static	11.5173	170
K26DD021	Nunamura	2008-08-01	HDR PL	Static	11.5505	171
K26DD021	Nunamura	2008-08-01	HDR PL	Static	11.5808	172
K26DD021	Nunamura	2008-08-01	HDR PL	Static	11.6141	173
K26DD021	Nunamura	2008-08-01	HDR PL	Static	11.6506	174
K26DD021	Nunamura	2008-08-01	HDR PL	Static	11.6902	175
K26DD021	Nunamura	2008-08-01	HDR PL	Static	11.7237	176
K26DD021	Nunamura	2008-08-01	HDR PL	Static	11.7451	177
K26DD021	Nunamura	2008-08-01	HDR PL	Static	11.7787	178
K26DD021	Nunamura	2008-08-01	HDR PL	Static	11.8063	179
K26DD021	Nunamura	2008-08-01	HDR PL	Static	11.8462	180
K26DD021	Nunamura	2008-08-01	HDR PL	Static	11.88	181
K26DD021	Nunamura	2008-08-01	HDR PL	Static	11.9232	182
K26DD021	Nunamura	2008-08-01	HDR PL	Static	11.951	183
K26DD021	Nunamura	2008-08-01	HDR PL	Static	11.9819	184
K26DD021	Nunamura	2008-08-01	HDR PL	Static	12.0191	185
K26DD021	Nunamura	2008-08-01	HDR PL	Static	12.0532	186
K26DD021	Nunamura	2008-08-01	HDR PL	Static	12.0843	187
K26DD021	Nunamura	2008-08-01	HDR PL	Static	12.1155	188
K26DD021	Nunamura	2008-08-01	HDR PL	Static	12.1498	189
K26DD021	Nunamura	2008-08-01	HDR PL	Static	12.1873	190
K26DD021	Nunamura	2008-08-01	HDR PL	Static	12.2155	191
K26DD021	Nunamura	2008-08-01	HDR PL	Static	12.2532	192
K26DD021	Nunamura	2008-08-01	HDR PL	Static	12.3161	193
K26DD021	Nunamura	2008-08-01	HDR PL	Static	12.3161	194
K26DD021	Nunamura	2008-08-01	HDR PL	Static	12.3539	195
K26DD021	Nunamura	2008-08-01	HDR PL	Static	12.4172	196
K26DD021	Nunamura	2008-08-01	HDR PL	Static	12.4648	197
K26DD021	Nunamura	2008-08-01	HDR PL	Static	12.4743	198
K26DD021	Nunamura	2008-08-01	HDR PL	Static	12.5093	199
K26DD021	Nunamura	2008-08-01	HDR PL	Static	12.5636	200
K26DD021	Nunamura	2008-08-01	HDR PL	Static	12.6019	201
K26DD021	Nunamura	2008-08-01	HDR PL	Static	12.618	202
K26DD021	Nunamura	2008-08-01	HDR PL	Static	12.634	203
K26DD021	Nunamura	2008-08-01	HDR PL	Static	12.6629	204
K26DD021	Nunamura	2008-08-01	HDR PL	Static	12.6886	205
K26DD021	Nunamura	2008-08-01	HDR PL	Static	12.708	206
K26DD021	Nunamura	2008-08-01	HDR PL	Static	12.7402	207
K26DD021	Nunamura	2008-08-01	HDR PL	Static	12.7854	208
K26DD021	Nunamura	2008-08-01	HDR PL	Static	12.8146	209
K26DD021	Nunamura	2008-08-01	HDR PL	Static	12.8535	210
K26DD021	Nunamura	2008-08-01	HDR PL	Static	12.886	211
K26DD021	Nunamura	2008-08-01	HDR PL	Static	12.9087	212
K26DD021	Nunamura	2008-08-01	HDR PL	Static	12.9381	213
K26DD021	Nunamura	2008-08-01	HDR PL	Static	12.9446	214
K26DD021	Nunamura	2008-08-01	HDR PL	Static	12.9447	215
K26DD021	Nunamura	2008-08-01	HDR PL	Static	12.9806	216
K26DD021	Nunamura	2008-08-01	HDR PL	Static	13.0854	217
K26DD021	Nunamura	2008-08-01	HDR PL	Static	13.115	218
K26DD021	Nunamura	2008-08-01	HDR PL	Static	13.1545	219
K26DD021	Nunamura	2008-08-01	HDR PL	Static	13.1909	220
K26DD021	Nunamura	2008-08-01	HDR PL	Static	13.224	221
K26DD021	Nunamura	2008-08-01	HDR PL	Static	13.2538	222
K26DD021	Nunamura	2008-08-01	HDR PL	Static	13.2704	223
K26DD021	Nunamura	2008-08-01	HDR PL	Static	13.297	224
K26DD021	Nunamura	2008-08-01	HDR PL	Static	13.3536	225
K26DD021	Nunamura	2008-08-01	HDR PL	Static	13.3936	226
K26DD021	Nunamura	2008-08-01	HDR PL	Static	13.4271	227
K26DD021	Nunamura	2008-08-01	HDR PL	Static	13.4539	228
K26DD021	Nunamura	2008-08-01	HDR PL	Static	13.4908	229
K26DD021	Nunamura	2008-08-01	HDR PL	Static	13.5177	230
K26DD021	Nunamura	2008-08-01	HDR PL	Static	13.5682	231
K26DD021	Nunamura	2008-08-01	HDR PL	Static	13.5952	232
K26DD021	Nunamura	2008-08-01	HDR PL	Static	13.6189	233
K26DD021	Nunamura	2008-08-01	HDR PL	Static	13.6358	234
K26DD021	Nunamura	2008-08-01	HDR PL	Static	13.6731	235
K26DD021	Nunamura	2008-08-01	HDR PL	Static	13.7002	236
K26DD024	Bluestone	2008-10-01	HDR PL	Static	9.3938	1
K26DD024	Bluestone	2008-10-01	HDR PL	Static	8.9818	2
K26DD024	Bluestone	2008-10-01	HDR PL	Static	8.8351	3
K26DD024	Bluestone	2008-10-01	HDR PL	Static	8.8012	4
K26DD024	Bluestone	2008-10-01	HDR PL	Static	8.8872	5
K26DD024	Bluestone	2008-10-01	HDR PL	Static	8.9763	6
K26DD024	Bluestone	2008-10-01	HDR PL	Static	8.971	7
K26DD024	Bluestone	2008-10-01	HDR PL	Static	9.0604	8
K26DD024	Bluestone	2008-10-01	HDR PL	Static	9.1928	9
K26DD024	Bluestone	2008-10-01	HDR PL	Static	9.27	10
K26DD024	Bluestone	2008-10-01	HDR PL	Static	9.2993	11
K26DD024	Bluestone	2008-10-01	HDR PL	Static	9.318	12
K26DD024	Bluestone	2008-10-01	HDR PL	Static	9.326	13
K26DD024	Bluestone	2008-10-01	HDR PL	Static	9.3179	14
K26DD024	Bluestone	2008-10-01	HDR PL	Static	9.2857	15
K26DD024	Bluestone	2008-10-01	HDR PL	Static	9.259	16
K26DD024	Bluestone	2008-10-01	HDR PL	Static	9.2322	17
K26DD024	Bluestone	2008-10-01	HDR PL	Static	9.2162	18
K26DD024	Bluestone	2008-10-01	HDR PL	Static	9.2002	19
K26DD024	Bluestone	2008-10-01	HDR PL	Static	9.2001	20
K26DD024	Bluestone	2008-10-01	HDR PL	Static	9.1841	21
K26DD024	Bluestone	2008-10-01	HDR PL	Static	9.1654	22
K26DD024	Bluestone	2008-10-01	HDR PL	Static	9.1495	23
K26DD024	Bluestone	2008-10-01	HDR PL	Static	9.1308	24
K26DD024	Bluestone	2008-10-01	HDR PL	Static	9.1175	25
K26DD024	Bluestone	2008-10-01	HDR PL	Static	9.1069	26
K26DD024	Bluestone	2008-10-01	HDR PL	Static	9.0963	27
K26DD024	Bluestone	2008-10-01	HDR PL	Static	9.0856	28
K26DD024	Bluestone	2008-10-01	HDR PL	Static	9.0803	29
K26DD024	Bluestone	2008-10-01	HDR PL	Static	9.067	30
K26DD024	Bluestone	2008-10-01	HDR PL	Static	9.0643	31
K26DD024	Bluestone	2008-10-01	HDR PL	Static	9.0642	32
K26DD024	Bluestone	2008-10-01	HDR PL	Static	9.0615	33
K26DD024	Bluestone	2008-10-01	HDR PL	Static	9.0536	34
K26DD024	Bluestone	2008-10-01	HDR PL	Static	9.0482	35
K26DD024	Bluestone	2008-10-01	HDR PL	Static	9.0376	36
K26DD024	Bluestone	2008-10-01	HDR PL	Static	9.0323	37
K26DD024	Bluestone	2008-10-01	HDR PL	Static	9.0322	38
K26DD024	Bluestone	2008-10-01	HDR PL	Static	9.0348	39
K26DD024	Bluestone	2008-10-01	HDR PL	Static	9.0348	40
K26DD024	Bluestone	2008-10-01	HDR PL	Static	9.0373	41
K26DD024	Bluestone	2008-10-01	HDR PL	Static	9.0373	42
K26DD024	Bluestone	2008-10-01	HDR PL	Static	9.0346	43
K26DD024	Bluestone	2008-10-01	HDR PL	Static	9.0345	44
K26DD024	Bluestone	2008-10-01	HDR PL	Static	8.8014	45
K26DD024	Bluestone	2008-10-01	HDR PL	Static	8.83	46
K26DD024	Bluestone	2008-10-01	HDR PL	Static	8.9056	47
K26DD024	Bluestone	2008-10-01	HDR PL	Static	8.9056	48
K26DD024	Bluestone	2008-10-01	HDR PL	Static	8.9108	49
K26DD024	Bluestone	2008-10-01	HDR PL	Static	8.9107	50
K26DD024	Bluestone	2008-10-01	HDR PL	Static	8.9264	51
K26DD024	Bluestone	2008-10-01	HDR PL	Static	8.9238	52
K26DD024	Bluestone	2008-10-01	HDR PL	Static	8.9264	53
K26DD024	Bluestone	2008-10-01	HDR PL	Static	8.9316	54
K26DD024	Bluestone	2008-10-01	HDR PL	Static	8.9368	55
K26DD024	Bluestone	2008-10-01	HDR PL	Static	8.9446	56
K26DD024	Bluestone	2008-10-01	HDR PL	Static	8.9577	57
K26DD024	Bluestone	2008-10-01	HDR PL	Static	8.963	58
K26DD024	Bluestone	2008-10-01	HDR PL	Static	8.9813	59
K26DD024	Bluestone	2008-10-01	HDR PL	Static	9.0155	60
K26DD024	Bluestone	2008-10-01	HDR PL	Static	9.0234	61
K26DD024	Bluestone	2008-10-01	HDR PL	Static	9.026	62
K26DD024	Bluestone	2008-10-01	HDR PL	Static	9.0365	63
K26DD024	Bluestone	2008-10-01	HDR PL	Static	9.0946	64
K26DD024	Bluestone	2008-10-01	HDR PL	Static	9.1237	65
K26DD024	Bluestone	2008-10-01	HDR PL	Static	9.1263	66
K26DD024	Bluestone	2008-10-01	HDR PL	Static	9.1342	67
K26DD024	Bluestone	2008-10-01	HDR PL	Static	9.1474	68
K26DD024	Bluestone	2008-10-01	HDR PL	Static	9.2032	69
K26DD024	Bluestone	2008-10-01	HDR PL	Static	9.2351	70
K26DD024	Bluestone	2008-10-01	HDR PL	Static	9.2431	71
K26DD024	Bluestone	2008-10-01	HDR PL	Static	9.2431	72
K26DD024	Bluestone	2008-10-01	HDR PL	Static	9.2484	73
K26DD024	Bluestone	2008-10-01	HDR PL	Static	9.2644	74
K26DD024	Bluestone	2008-10-01	HDR PL	Static	9.275	75
K26DD024	Bluestone	2008-10-01	HDR PL	Static	9.2991	76
K26DD024	Bluestone	2008-10-01	HDR PL	Static	9.3365	77
K26DD024	Bluestone	2008-10-01	HDR PL	Static	9.366	78
K26DD024	Bluestone	2008-10-01	HDR PL	Static	9.3821	79
K26DD024	Bluestone	2008-10-01	HDR PL	Static	9.3955	80
K26DD024	Bluestone	2008-10-01	HDR PL	Static	9.4385	81
K26DD024	Bluestone	2008-10-01	HDR PL	Static	9.452	82
K26DD024	Bluestone	2008-10-01	HDR PL	Static	9.4952	83
K26DD024	Bluestone	2008-10-01	HDR PL	Static	9.506	84
K26DD024	Bluestone	2008-10-01	HDR PL	Static	9.5547	85
K26DD024	Bluestone	2008-10-01	HDR PL	Static	9.6008	86
K26DD024	Bluestone	2008-10-01	HDR PL	Static	9.6199	87
K26DD024	Bluestone	2008-10-01	HDR PL	Static	9.6307	88
K26DD024	Bluestone	2008-10-01	HDR PL	Static	9.6552	89
K26DD024	Bluestone	2008-10-01	HDR PL	Static	9.677	90
K26DD024	Bluestone	2008-10-01	HDR PL	Static	9.7125	91
K26DD024	Bluestone	2008-10-01	HDR PL	Static	9.7481	92
K26DD024	Bluestone	2008-10-01	HDR PL	Static	9.7645	93
K26DD024	Bluestone	2008-10-01	HDR PL	Static	9.8002	94
K26DD024	Bluestone	2008-10-01	HDR PL	Static	9.8139	95
K26DD024	Bluestone	2008-10-01	HDR PL	Static	9.8304	96
K26DD024	Bluestone	2008-10-01	HDR PL	Static	9.8497	97
K26DD024	Bluestone	2008-10-01	HDR PL	Static	9.8607	98
K26DD024	Bluestone	2008-10-01	HDR PL	Static	9.8883	99
K26DD024	Bluestone	2008-10-01	HDR PL	Static	9.9353	100
K26DD024	Bluestone	2008-10-01	HDR PL	Static	9.9602	101
K26DD024	Bluestone	2008-10-01	HDR PL	Static	9.9685	102
K26DD024	Bluestone	2008-10-01	HDR PL	Static	9.9657	103
K26DD024	Bluestone	2008-10-01	HDR PL	Static	10.0045	104
K26DD024	Bluestone	2008-10-01	HDR PL	Static	10.0629	105
K26DD024	Bluestone	2008-10-01	HDR PL	Static	10.0908	106
K26DD024	Bluestone	2008-10-01	HDR PL	Static	10.1131	107
K26DD024	Bluestone	2008-10-01	HDR PL	Static	10.1271	108
K26DD024	Bluestone	2008-10-01	HDR PL	Static	10.1635	109
K26DD024	Bluestone	2008-10-01	HDR PL	Static	10.1915	110
K26DD024	Bluestone	2008-10-01	HDR PL	Static	10.2168	111
K26DD024	Bluestone	2008-10-01	HDR PL	Static	10.2505	112
K26DD024	Bluestone	2008-10-01	HDR PL	Static	10.2871	113
K26DD024	Bluestone	2008-10-01	HDR PL	Static	10.3041	114
K26DD024	Bluestone	2008-10-01	HDR PL	Static	10.3267	115
K26DD024	Bluestone	2008-10-01	HDR PL	Static	10.3691	116
K26DD024	Bluestone	2008-10-01	HDR PL	Static	10.4515	117
K26DD024	Bluestone	2008-10-01	HDR PL	Static	10.4714	118
K26DD024	Bluestone	2008-10-01	HDR PL	Static	10.4885	119
K26DD024	Bluestone	2008-10-01	HDR PL	Static	10.5142	120
K26DD024	Bluestone	2008-10-01	HDR PL	Static	10.5399	121
K26DD024	Bluestone	2008-10-01	HDR PL	Static	10.5685	122
K26DD024	Bluestone	2008-10-01	HDR PL	Static	10.5885	123
K26DD024	Bluestone	2008-10-01	HDR PL	Static	10.6057	124
K26DD024	Bluestone	2008-10-01	HDR PL	Static	10.646	125
K26DD024	Bluestone	2008-10-01	HDR PL	Static	10.6949	126
K26DD024	Bluestone	2008-10-01	HDR PL	Static	10.7325	127
K26DD024	Bluestone	2008-10-01	HDR PL	Static	10.7614	128
K26DD024	Bluestone	2008-10-01	HDR PL	Static	10.7874	129
K26DD024	Bluestone	2008-10-01	HDR PL	Static	10.8106	130
K26DD024	Bluestone	2008-10-01	HDR PL	Static	10.8688	131
K26DD024	Bluestone	2008-10-01	HDR PL	Static	10.8862	132
K26DD024	Bluestone	2008-10-01	HDR PL	Static	10.9066	133
K26DD024	Bluestone	2008-10-01	HDR PL	Static	10.9417	134
K26DD024	Bluestone	2008-10-01	HDR PL	Static	10.9709	135
K26DD024	Bluestone	2008-10-01	HDR PL	Static	11.0178	136
K26DD024	Bluestone	2008-10-01	HDR PL	Static	11.0354	137
K26DD024	Bluestone	2008-10-01	HDR PL	Static	11.0737	138
K26DD024	Bluestone	2008-10-01	HDR PL	Static	11.0972	139
K26DD024	Bluestone	2008-10-01	HDR PL	Static	11.1385	140
K26DD024	Bluestone	2008-10-01	HDR PL	Static	11.171	141
K26DD024	Bluestone	2008-10-01	HDR PL	Static	11.1947	142
K26DD024	Bluestone	2008-10-01	HDR PL	Static	11.2244	143
K26DD024	Bluestone	2008-10-01	HDR PL	Static	11.2719	144
K26DD024	Bluestone	2008-10-01	HDR PL	Static	11.3077	145
K26DD024	Bluestone	2008-10-01	HDR PL	Static	11.3435	146
K26DD024	Bluestone	2008-10-01	HDR PL	Static	11.3764	147
K26DD024	Bluestone	2008-10-01	HDR PL	Static	11.4153	148
K26DD024	Bluestone	2008-10-01	HDR PL	Static	11.4333	149
K26DD024	Bluestone	2008-10-01	HDR PL	Static	11.4904	150
K26DD024	Bluestone	2008-10-01	HDR PL	Static	11.4995	151
K26DD024	Bluestone	2008-10-01	HDR PL	Static	11.5176	152
K26DD024	Bluestone	2008-10-01	HDR PL	Static	11.5477	153
K26DD024	Bluestone	2008-10-01	HDR PL	Static	11.578	154
K26DD024	Bluestone	2008-10-01	HDR PL	Static	11.6052	155
K26DD024	Bluestone	2008-10-01	HDR PL	Static	11.6356	156
K26DD024	Bluestone	2008-10-01	HDR PL	Static	11.6538	157
K26DD024	Bluestone	2008-10-01	HDR PL	Static	11.6811	158
K26DD024	Bluestone	2008-10-01	HDR PL	Static	11.6994	159
K26DD024	Bluestone	2008-10-01	HDR PL	Static	11.7268	160
K26DD024	Bluestone	2008-10-01	HDR PL	Static	11.7482	161
K26DD024	Bluestone	2008-10-01	HDR PL	Static	11.7788	162
K26DD024	Bluestone	2008-10-01	HDR PL	Static	11.8125	163
K26DD024	Bluestone	2008-10-01	HDR PL	Static	11.837	164
K26DD024	Bluestone	2008-10-01	HDR PL	Static	11.8493	165
K26DD024	Bluestone	2008-10-01	HDR PL	Static	11.8585	166
K26DD024	Bluestone	2008-10-01	HDR PL	Static	11.88	167
K26DD024	Bluestone	2008-10-01	HDR PL	Static	11.9108	168
K26DD024	Bluestone	2008-10-01	HDR PL	Static	11.9509	169
K26DD024	Bluestone	2008-10-01	HDR PL	Static	12.0127	170
K26DD024	Bluestone	2008-10-01	HDR PL	Static	12.0313	171
K26DD024	Bluestone	2008-10-01	HDR PL	Static	12.0748	172
K26DD024	Bluestone	2008-10-01	HDR PL	Static	12.1184	173
K26DD024	Bluestone	2008-10-01	HDR PL	Static	12.1464	174
K26DD024	Bluestone	2008-10-01	HDR PL	Static	12.1871	175
K26DD024	Bluestone	2008-10-01	HDR PL	Static	12.2403	176
K26DD024	Bluestone	2008-10-01	HDR PL	Static	12.2874	177
K26DD024	Bluestone	2008-10-01	HDR PL	Static	12.3158	178
K26DD024	Bluestone	2008-10-01	HDR PL	Static	12.3662	179
K26DD024	Bluestone	2008-10-01	HDR PL	Static	12.3947	180
K26DD024	Bluestone	2008-10-01	HDR PL	Static	12.4231	181
K26DD024	Bluestone	2008-10-01	HDR PL	Static	12.4548	182
K26DD024	Bluestone	2008-10-01	HDR PL	Static	12.5025	183
K26DD024	Bluestone	2008-10-01	HDR PL	Static	12.5344	184
K26DD024	Bluestone	2008-10-01	HDR PL	Static	12.5662	185
K26DD024	Bluestone	2008-10-01	HDR PL	Static	12.5918	186
K26DD024	Bluestone	2008-10-01	HDR PL	Static	12.643	187
K26DD024	Bluestone	2008-10-01	HDR PL	Static	12.6526	188
K26DD024	Bluestone	2008-10-01	HDR PL	Static	12.6879	189
K26DD024	Bluestone	2008-10-01	HDR PL	Static	12.7298	190
K26DD024	Bluestone	2008-10-01	HDR PL	Static	12.762	191
K26DD024	Bluestone	2008-10-01	HDR PL	Static	12.7975	192
K26DD024	Bluestone	2008-10-01	HDR PL	Static	12.8266	193
K26DD024	Bluestone	2008-10-01	HDR PL	Static	12.9078	194
K26DD024	Bluestone	2008-10-01	HDR PL	Static	12.9142	195
K26DD024	Bluestone	2008-10-01	HDR PL	Static	12.9435	196
K26DD024	Bluestone	2008-10-01	HDR PL	Static	12.9827	197
K26DD024	Bluestone	2008-10-01	HDR PL	Static	13.0186	198
K26DD024	Bluestone	2008-10-01	HDR PL	Static	13.0382	199
K26DD024	Bluestone	2008-10-01	HDR PL	Static	13.071	200
K26DD024	Bluestone	2008-10-01	HDR PL	Static	13.0973	201
K26DD024	Bluestone	2008-10-01	HDR PL	Static	13.1466	202
K26DD024	Bluestone	2008-10-01	HDR PL	Static	13.206	203
K26DD024	Bluestone	2008-10-01	HDR PL	Static	13.2126	204
K26DD024	Bluestone	2008-10-01	HDR PL	Static	13.2391	205
K26DD024	Bluestone	2008-10-01	HDR PL	Static	13.2788	206
K26DD024	Bluestone	2008-10-01	HDR PL	Static	13.312	207
K26DD024	Bluestone	2008-10-01	HDR PL	Static	13.3586	208
K26DD024	Bluestone	2008-10-01	HDR PL	Static	13.3786	209
K26DD024	Bluestone	2008-10-01	HDR PL	Static	13.3953	210
K26DD024	Bluestone	2008-10-01	HDR PL	Static	13.4354	211
K26DD024	Bluestone	2008-10-01	HDR PL	Static	13.4924	212
K26DD024	Bluestone	2008-10-01	HDR PL	Static	13.5091	213
K26DD024	Bluestone	2008-10-01	HDR PL	Static	13.5394	214
K26DD024	Bluestone	2008-10-01	HDR PL	Static	13.5596	215
K26DD024	Bluestone	2008-10-01	HDR PL	Static	13.5832	216
K26DD024	Bluestone	2008-10-01	HDR PL	Static	13.6372	217
K26DD024	Bluestone	2008-10-01	HDR PL	Static	13.6812	218
K26DD024	Bluestone	2008-10-01	HDR PL	Static	13.7152	219
K26DD024	Bluestone	2008-10-01	HDR PL	Static	13.7525	220
K26DD024	Bluestone	2008-10-01	HDR PL	Static	13.7661	221
K26DD024	Bluestone	2008-10-01	HDR PL	Static	13.7968	222
K26DD024	Bluestone	2008-10-01	HDR PL	Static	13.8378	223
K26DD024	Bluestone	2008-10-01	HDR PL	Static	13.8583	224
K26DD024	Bluestone	2008-10-01	HDR PL	Static	13.9063	225
K26DD024	Bluestone	2008-10-01	HDR PL	Static	13.9337	226
K26DD024	Bluestone	2008-10-01	HDR PL	Static	13.9681	227
K26DD024	Bluestone	2008-10-01	HDR PL	Static	13.9922	228
K26DD024	Bluestone	2008-10-01	HDR PL	Static	14.0267	229
K26DD024	Bluestone	2008-10-01	HDR PL	Static	14.0648	230
K26DD024	Bluestone	2008-10-01	HDR PL	Static	14.0994	231
K26DD024	Bluestone	2008-10-01	HDR PL	Static	14.1341	232
K26DD024	Bluestone	2008-10-01	HDR PL	Static	14.1654	233
K26DD024	Bluestone	2008-10-01	HDR PL	Static	14.2002	234
K26DD024	Bluestone	2008-10-01	HDR PL	Static	14.2351	235
K26DD024	Bluestone	2008-10-01	HDR PL	Static	14.2875	236
K26DD024	Bluestone	2008-10-01	HDR PL	Static	14.3331	237
K26DD024	Bluestone	2008-10-01	HDR PL	Static	14.3577	238
K26DD024	Bluestone	2008-10-01	HDR PL	Static	14.3928	239
K26DD024	Bluestone	2008-10-01	HDR PL	Static	14.4281	240
K26DD024	Bluestone	2008-10-01	HDR PL	Static	14.4492	241
K26DD024	Bluestone	2008-10-01	HDR PL	Static	14.4704	242
K26DD024	Bluestone	2008-10-01	HDR PL	Static	14.5094	243
K26DD024	Bluestone	2008-10-01	HDR PL	Static	14.5448	244
K26DD024	Bluestone	2008-10-01	HDR PL	Static	14.5733	245
K26DD024	Bluestone	2008-10-01	HDR PL	Static	14.6302	246
K26DD024	Bluestone	2008-10-01	HDR PL	Static	14.6588	247
K26DD024	Bluestone	2008-10-01	HDR PL	Static	14.6874	248
K26DD024	Bluestone	2008-10-01	HDR PL	Static	14.716	249
K26DD024	Bluestone	2008-10-01	HDR PL	Static	14.759	250
K26DD024	Bluestone	2008-10-01	HDR PL	Static	14.8058	251
K26DD024	Bluestone	2008-10-01	HDR PL	Static	14.8057	252
K26DD024	Bluestone	2008-10-01	HDR PL	Static	14.9032	253
K26DD022	Bangor	2008-10-01	HDR PL	Static	8.8978	1
K26DD022	Bangor	2008-10-01	HDR PL	Static	8.791	2
K26DD022	Bangor	2008-10-01	HDR PL	Static	8.7936	3
K26DD022	Bangor	2008-10-01	HDR PL	Static	8.8693	4
K26DD022	Bangor	2008-10-01	HDR PL	Static	9.0531	5
K26DD022	Bangor	2008-10-01	HDR PL	Static	9.1856	6
K26DD022	Bangor	2008-10-01	HDR PL	Static	9.3083	7
K26DD022	Bangor	2008-10-01	HDR PL	Static	9.405	8
K26DD022	Bangor	2008-10-01	HDR PL	Static	9.4724	9
K26DD022	Bangor	2008-10-01	HDR PL	Static	9.5266	10
K26DD022	Bangor	2008-10-01	HDR PL	Static	9.5592	11
K26DD022	Bangor	2008-10-01	HDR PL	Static	9.5701	12
K26DD022	Bangor	2008-10-01	HDR PL	Static	9.5702	13
K26DD022	Bangor	2008-10-01	HDR PL	Static	9.5675	14
K26DD022	Bangor	2008-10-01	HDR PL	Static	9.5568	15
K26DD022	Bangor	2008-10-01	HDR PL	Static	9.5406	16
K26DD022	Bangor	2008-10-01	HDR PL	Static	9.5271	17
K26DD022	Bangor	2008-10-01	HDR PL	Static	9.5082	18
K26DD022	Bangor	2008-10-01	HDR PL	Static	9.4867	19
K26DD022	Bangor	2008-10-01	HDR PL	Static	9.4787	20
K26DD022	Bangor	2008-10-01	HDR PL	Static	9.4679	21
K26DD022	Bangor	2008-10-01	HDR PL	Static	9.4626	22
K26DD022	Bangor	2008-10-01	HDR PL	Static	9.4546	23
K26DD022	Bangor	2008-10-01	HDR PL	Static	9.4466	24
K26DD022	Bangor	2008-10-01	HDR PL	Static	9.4386	25
K26DD022	Bangor	2008-10-01	HDR PL	Static	9.4387	26
K26DD022	Bangor	2008-10-01	HDR PL	Static	9.436	27
K26DD022	Bangor	2008-10-01	HDR PL	Static	9.4388	28
K26DD022	Bangor	2008-10-01	HDR PL	Static	9.4362	29
K26DD022	Bangor	2008-10-01	HDR PL	Static	9.4363	30
K26DD022	Bangor	2008-10-01	HDR PL	Static	9.4337	31
K26DD022	Bangor	2008-10-01	HDR PL	Static	9.4337	32
K26DD022	Bangor	2008-10-01	HDR PL	Static	9.4338	33
K26DD022	Bangor	2008-10-01	HDR PL	Static	9.4339	34
K26DD022	Bangor	2008-10-01	HDR PL	Static	9.4313	35
K26DD022	Bangor	2008-10-01	HDR PL	Static	9.434	36
K26DD022	Bangor	2008-10-01	HDR PL	Static	9.4341	37
K26DD022	Bangor	2008-10-01	HDR PL	Static	9.4369	38
K26DD022	Bangor	2008-10-01	HDR PL	Static	9.437	39
K26DD022	Bangor	2008-10-01	HDR PL	Static	9.4397	40
K26DD022	Bangor	2008-10-01	HDR PL	Static	9.4398	41
K26DD022	Bangor	2008-10-01	HDR PL	Static	9.4426	42
K26DD022	Bangor	2008-10-01	HDR PL	Static	9.4454	43
K26DD022	Bangor	2008-10-01	HDR PL	Static	9.4454	44
K26DD022	Bangor	2008-10-01	HDR PL	Static	9.4509	45
K26DD022	Bangor	2008-10-01	HDR PL	Static	9.4537	46
K26DD022	Bangor	2008-10-01	HDR PL	Static	9.4565	47
K26DD022	Bangor	2008-10-01	HDR PL	Static	9.4592	48
K26DD022	Bangor	2008-10-01	HDR PL	Static	9.4512	49
K26DD022	Bangor	2008-10-01	HDR PL	Static	9.4567	50
K26DD022	Bangor	2008-10-01	HDR PL	Static	9.4622	51
K26DD022	Bangor	2008-10-01	HDR PL	Static	9.4731	52
K26DD022	Bangor	2008-10-01	HDR PL	Static	9.4813	53
K26DD022	Bangor	2008-10-01	HDR PL	Static	9.4895	54
K26DD022	Bangor	2008-10-01	HDR PL	Static	9.5004	55
K26DD022	Bangor	2008-10-01	HDR PL	Static	9.5086	56
K26DD022	Bangor	2008-10-01	HDR PL	Static	9.5195	57
K26DD022	Bangor	2008-10-01	HDR PL	Static	9.5305	58
K26DD022	Bangor	2008-10-01	HDR PL	Static	9.5387	59
K26DD022	Bangor	2008-10-01	HDR PL	Static	9.5524	60
K26DD022	Bangor	2008-10-01	HDR PL	Static	9.5742	61
K26DD022	Bangor	2008-10-01	HDR PL	Static	9.5906	62
K26DD022	Bangor	2008-10-01	HDR PL	Static	9.6043	63
K26DD022	Bangor	2008-10-01	HDR PL	Static	9.6152	64
K26DD022	Bangor	2008-10-01	HDR PL	Static	9.6181	65
K26DD022	Bangor	2008-10-01	HDR PL	Static	9.6209	66
K26DD022	Bangor	2008-10-01	HDR PL	Static	9.6237	67
K26DD022	Bangor	2008-10-01	HDR PL	Static	9.6783	68
K26DD022	Bangor	2008-10-01	HDR PL	Static	9.7249	69
K26DD022	Bangor	2008-10-01	HDR PL	Static	9.7277	70
K26DD022	Bangor	2008-10-01	HDR PL	Static	9.7443	71
K26DD022	Bangor	2008-10-01	HDR PL	Static	9.7965	72
K26DD022	Bangor	2008-10-01	HDR PL	Static	9.7939	73
K26DD022	Bangor	2008-10-01	HDR PL	Static	9.7967	74
K26DD022	Bangor	2008-10-01	HDR PL	Static	9.8161	75
K26DD022	Bangor	2008-10-01	HDR PL	Static	9.8272	76
K26DD022	Bangor	2008-10-01	HDR PL	Static	9.8328	77
K26DD022	Bangor	2008-10-01	HDR PL	Static	9.8384	78
K26DD022	Bangor	2008-10-01	HDR PL	Static	9.844	79
K26DD022	Bangor	2008-10-01	HDR PL	Static	9.8469	80
K26DD022	Bangor	2008-10-01	HDR PL	Static	9.847	81
K26DD022	Bangor	2008-10-01	HDR PL	Static	9.8416	82
K26DD022	Bangor	2008-10-01	HDR PL	Static	9.85	83
K26DD022	Bangor	2008-10-01	HDR PL	Static	9.8528	84
K26DD022	Bangor	2008-10-01	HDR PL	Static	9.8639	85
K26DD022	Bangor	2008-10-01	HDR PL	Static	9.8999	86
K26DD022	Bangor	2008-10-01	HDR PL	Static	9.9554	87
K26DD022	Bangor	2008-10-01	HDR PL	Static	9.9805	88
K26DD022	Bangor	2008-10-01	HDR PL	Static	9.9806	89
K26DD022	Bangor	2008-10-01	HDR PL	Static	9.9807	90
K26DD022	Bangor	2008-10-01	HDR PL	Static	9.9891	91
K26DD022	Bangor	2008-10-01	HDR PL	Static	9.9975	92
K26DD022	Bangor	2008-10-01	HDR PL	Static	10.0143	93
K26DD022	Bangor	2008-10-01	HDR PL	Static	10.0506	94
K26DD022	Bangor	2008-10-01	HDR PL	Static	10.087	95
K26DD022	Bangor	2008-10-01	HDR PL	Static	10.1206	96
K26DD022	Bangor	2008-10-01	HDR PL	Static	10.1263	97
K26DD022	Bangor	2008-10-01	HDR PL	Static	10.1236	98
K26DD022	Bangor	2008-10-01	HDR PL	Static	10.1293	99
K26DD022	Bangor	2008-10-01	HDR PL	Static	10.1406	100
K26DD022	Bangor	2008-10-01	HDR PL	Static	10.1519	101
K26DD022	Bangor	2008-10-01	HDR PL	Static	10.1968	102
K26DD022	Bangor	2008-10-01	HDR PL	Static	10.2615	103
K26DD022	Bangor	2008-10-01	HDR PL	Static	10.2813	104
K26DD022	Bangor	2008-10-01	HDR PL	Static	10.2897	105
K26DD022	Bangor	2008-10-01	HDR PL	Static	10.2841	106
K26DD022	Bangor	2008-10-01	HDR PL	Static	10.2954	107
K26DD022	Bangor	2008-10-01	HDR PL	Static	10.3124	108
K26DD022	Bangor	2008-10-01	HDR PL	Static	10.3322	109
K26DD022	Bangor	2008-10-01	HDR PL	Static	10.3832	110
K26DD022	Bangor	2008-10-01	HDR PL	Static	10.4116	111
K26DD022	Bangor	2008-10-01	HDR PL	Static	10.4202	112
K26DD022	Bangor	2008-10-01	HDR PL	Static	10.4231	113
K26DD022	Bangor	2008-10-01	HDR PL	Static	10.4373	114
K26DD022	Bangor	2008-10-01	HDR PL	Static	10.4601	115
K26DD022	Bangor	2008-10-01	HDR PL	Static	10.4801	116
K26DD022	Bangor	2008-10-01	HDR PL	Static	10.5086	117
K26DD022	Bangor	2008-10-01	HDR PL	Static	10.543	118
K26DD022	Bangor	2008-10-01	HDR PL	Static	10.5659	119
K26DD022	Bangor	2008-10-01	HDR PL	Static	10.5688	120
K26DD022	Bangor	2008-10-01	HDR PL	Static	10.5803	121
K26DD022	Bangor	2008-10-01	HDR PL	Static	10.5918	122
K26DD022	Bangor	2008-10-01	HDR PL	Static	10.6061	123
K26DD022	Bangor	2008-10-01	HDR PL	Static	10.6263	124
K26DD022	Bangor	2008-10-01	HDR PL	Static	10.6493	125
K26DD022	Bangor	2008-10-01	HDR PL	Static	10.6724	126
K26DD022	Bangor	2008-10-01	HDR PL	Static	10.7272	127
K26DD022	Bangor	2008-10-01	HDR PL	Static	10.7591	128
K26DD022	Bangor	2008-10-01	HDR PL	Static	10.7823	129
K26DD022	Bangor	2008-10-01	HDR PL	Static	10.7765	130
K26DD022	Bangor	2008-10-01	HDR PL	Static	10.7881	131
K26DD022	Bangor	2008-10-01	HDR PL	Static	10.7998	132
K26DD022	Bangor	2008-10-01	HDR PL	Static	10.8288	133
K26DD022	Bangor	2008-10-01	HDR PL	Static	10.8609	134
K26DD022	Bangor	2008-10-01	HDR PL	Static	10.9134	135
K26DD022	Bangor	2008-10-01	HDR PL	Static	10.9251	136
K26DD022	Bangor	2008-10-01	HDR PL	Static	10.9251	137
K26DD022	Bangor	2008-10-01	HDR PL	Static	10.931	138
K26DD022	Bangor	2008-10-01	HDR PL	Static	10.9427	139
K26DD022	Bangor	2008-10-01	HDR PL	Static	10.9661	140
K26DD022	Bangor	2008-10-01	HDR PL	Static	10.9837	141
K26DD022	Bangor	2008-10-01	HDR PL	Static	11.0336	142
K26DD022	Bangor	2008-10-01	HDR PL	Static	11.0807	143
K26DD022	Bangor	2008-10-01	HDR PL	Static	11.1309	144
K26DD022	Bangor	2008-10-01	HDR PL	Static	11.1428	145
K26DD022	Bangor	2008-10-01	HDR PL	Static	11.1428	146
K26DD022	Bangor	2008-10-01	HDR PL	Static	11.1369	147
K26DD022	Bangor	2008-10-01	HDR PL	Static	11.1517	148
K26DD022	Bangor	2008-10-01	HDR PL	Static	11.1873	149
K26DD022	Bangor	2008-10-01	HDR PL	Static	11.2288	150
K26DD022	Bangor	2008-10-01	HDR PL	Static	11.2675	151
K26DD022	Bangor	2008-10-01	HDR PL	Static	11.2884	152
K26DD022	Bangor	2008-10-01	HDR PL	Static	11.3064	153
K26DD022	Bangor	2008-10-01	HDR PL	Static	11.3064	154
K26DD022	Bangor	2008-10-01	HDR PL	Static	11.3035	155
K26DD022	Bangor	2008-10-01	HDR PL	Static	11.3244	156
K26DD022	Bangor	2008-10-01	HDR PL	Static	11.3514	157
K26DD022	Bangor	2008-10-01	HDR PL	Static	11.3754	158
K26DD022	Bangor	2008-10-01	HDR PL	Static	11.3994	159
K26DD022	Bangor	2008-10-01	HDR PL	Static	11.4264	160
K26DD022	Bangor	2008-10-01	HDR PL	Static	11.4445	161
K26DD022	Bangor	2008-10-01	HDR PL	Static	11.4897	162
K26DD022	Bangor	2008-10-01	HDR PL	Static	11.5138	163
K26DD022	Bangor	2008-10-01	HDR PL	Static	11.526	164
K26DD022	Bangor	2008-10-01	HDR PL	Static	11.5351	165
K26DD022	Bangor	2008-10-01	HDR PL	Static	11.5744	166
K26DD022	Bangor	2008-10-01	HDR PL	Static	11.5987	167
K26DD022	Bangor	2008-10-01	HDR PL	Static	11.623	168
K26DD022	Bangor	2008-10-01	HDR PL	Static	11.6474	169
K26DD022	Bangor	2008-10-01	HDR PL	Static	11.6717	170
K26DD022	Bangor	2008-10-01	HDR PL	Static	11.6961	171
K26DD022	Bangor	2008-10-01	HDR PL	Static	11.7175	172
K26DD022	Bangor	2008-10-01	HDR PL	Static	11.745	173
K26DD022	Bangor	2008-10-01	HDR PL	Static	11.7696	174
K26DD022	Bangor	2008-10-01	HDR PL	Static	11.8002	175
K26DD022	Bangor	2008-10-01	HDR PL	Static	11.8187	176
K26DD022	Bangor	2008-10-01	HDR PL	Static	11.8371	177
K26DD022	Bangor	2008-10-01	HDR PL	Static	11.8648	178
K26DD022	Bangor	2008-10-01	HDR PL	Static	11.8833	179
K26DD022	Bangor	2008-10-01	HDR PL	Static	11.9111	180
K26DD022	Bangor	2008-10-01	HDR PL	Static	11.9327	181
K26DD022	Bangor	2008-10-01	HDR PL	Static	11.9575	182
K26DD022	Bangor	2008-10-01	HDR PL	Static	11.9792	183
K26DD022	Bangor	2008-10-01	HDR PL	Static	12.004	184
K26DD022	Bangor	2008-10-01	HDR PL	Static	12.0257	185
K26DD022	Bangor	2008-10-01	HDR PL	Static	12.0537	186
K26DD022	Bangor	2008-10-01	HDR PL	Static	12.0755	187
K26DD022	Bangor	2008-10-01	HDR PL	Static	12.1005	188
K26DD022	Bangor	2008-10-01	HDR PL	Static	12.1223	189
K26DD022	Bangor	2008-10-01	HDR PL	Static	12.1442	190
K26DD022	Bangor	2008-10-01	HDR PL	Static	12.163	191
K26DD022	Bangor	2008-10-01	HDR PL	Static	12.1849	192
K26DD022	Bangor	2008-10-01	HDR PL	Static	12.21	193
K26DD022	Bangor	2008-10-01	HDR PL	Static	12.232	194
K26DD022	Bangor	2008-10-01	HDR PL	Static	12.2572	195
K26DD022	Bangor	2008-10-01	HDR PL	Static	12.2792	196
K26DD022	Bangor	2008-10-01	HDR PL	Static	12.3045	197
K26DD022	Bangor	2008-10-01	HDR PL	Static	12.3266	198
K26DD022	Bangor	2008-10-01	HDR PL	Static	12.3518	199
K26DD022	Bangor	2008-10-01	HDR PL	Static	12.374	200
K26DD022	Bangor	2008-10-01	HDR PL	Static	12.4025	201
K26DD022	Bangor	2008-10-01	HDR PL	Static	12.4279	202
K26DD022	Bangor	2008-10-01	HDR PL	Static	12.4533	203
K26DD022	Bangor	2008-10-01	HDR PL	Static	12.4756	204
K26DD022	Bangor	2008-10-01	HDR PL	Static	12.4979	205
K26DD022	Bangor	2008-10-01	HDR PL	Static	12.5234	206
K26DD022	Bangor	2008-10-01	HDR PL	Static	12.5457	207
K26DD022	Bangor	2008-10-01	HDR PL	Static	12.5681	208
K26DD022	Bangor	2008-10-01	HDR PL	Static	12.5937	209
K26DD022	Bangor	2008-10-01	HDR PL	Static	12.6161	210
K26DD022	Bangor	2008-10-01	HDR PL	Static	12.6418	211
K26DD022	Bangor	2008-10-01	HDR PL	Static	12.6675	212
K26DD022	Bangor	2008-10-01	HDR PL	Static	12.6932	213
K26DD022	Bangor	2008-10-01	HDR PL	Static	12.7158	214
K26DD022	Bangor	2008-10-01	HDR PL	Static	12.7416	215
K26DD022	Bangor	2008-10-01	HDR PL	Static	12.7674	216
K26DD022	Bangor	2008-10-01	HDR PL	Static	12.7966	217
K26DD022	Bangor	2008-10-01	HDR PL	Static	12.8225	218
K26DD022	Bangor	2008-10-01	HDR PL	Static	12.8517	219
K26DD022	Bangor	2008-10-01	HDR PL	Static	12.8712	220
K26DD022	Bangor	2008-10-01	HDR PL	Static	12.8972	221
K26DD022	Bangor	2008-10-01	HDR PL	Static	12.92	222
K26DD022	Bangor	2008-10-01	HDR PL	Static	12.9689	223
K26DD022	Bangor	2008-10-01	HDR PL	Static	12.9853	224
K26DD022	Bangor	2008-10-01	HDR PL	Static	12.9984	225
K26DD022	Bangor	2008-10-01	HDR PL	Static	13.0115	226
K26DD022	Bangor	2008-10-01	HDR PL	Static	13.0312	227
K26DD022	Bangor	2008-10-01	HDR PL	Static	13.0607	228
K26DD022	Bangor	2008-10-01	HDR PL	Static	13.0969	229
K26DD022	Bangor	2008-10-01	HDR PL	Static	13.1298	230
K26DD022	Bangor	2008-10-01	HDR PL	Static	13.1364	231
K26DD022	Bangor	2008-10-01	HDR PL	Static	13.1661	232
K26DD022	Bangor	2008-10-01	HDR PL	Static	13.2091	233
K26DD022	Bangor	2008-10-01	HDR PL	Static	13.2422	234
K26DD022	Bangor	2008-10-01	HDR PL	Static	13.2522	235
K26DD022	Bangor	2008-10-01	HDR PL	Static	13.2654	236
K26DD022	Bangor	2008-10-01	HDR PL	Static	13.292	237
K26DD022	Bangor	2008-10-01	HDR PL	Static	13.322	238
K26DD022	Bangor	2008-10-01	HDR PL	Static	13.352	239
K26DD022	Bangor	2008-10-01	HDR PL	Static	13.3753	240
K26DD022	Bangor	2008-10-01	HDR PL	Static	13.3887	241
K26DD022	Bangor	2008-10-01	HDR PL	Static	13.4021	242
K26DD022	Bangor	2008-10-01	HDR PL	Static	13.4289	243
K26DD022	Bangor	2008-10-01	HDR PL	Static	13.4591	244
K26DD022	Bangor	2008-10-01	HDR PL	Static	13.496	245
K26DD022	Bangor	2008-10-01	HDR PL	Static	13.533	246
K26DD022	Bangor	2008-10-01	HDR PL	Static	13.5599	247
K26DD022	Bangor	2008-10-01	HDR PL	Static	13.5937	248
K26DD022	Bangor	2008-10-01	HDR PL	Static	13.614	249
K26DD022	Bangor	2008-10-01	HDR PL	Static	13.6445	250
K26DD022	Bangor	2008-10-01	HDR PL	Static	13.6682	251
K26DD017	Mt Nicholas	2008-07-01	HDR PL	Static	4.5493	1
K26DD017	Mt Nicholas	2008-07-01	HDR PL	Static	6.0791	2
K26DD017	Mt Nicholas	2008-07-01	HDR PL	Static	7.0089	3
K26DD017	Mt Nicholas	2008-07-01	HDR PL	Static	7.3731	4
K26DD017	Mt Nicholas	2008-07-01	HDR PL	Static	7.7447	5
K26DD017	Mt Nicholas	2008-07-01	HDR PL	Static	7.9893	6
K26DD017	Mt Nicholas	2008-07-01	HDR PL	Static	7.9595	7
K26DD017	Mt Nicholas	2008-07-01	HDR PL	Static	8.2651	8
K26DD017	Mt Nicholas	2008-07-01	HDR PL	Static	8.6145	9
K26DD017	Mt Nicholas	2008-07-01	HDR PL	Static	8.7411	10
K26DD017	Mt Nicholas	2008-07-01	HDR PL	Static	8.7515	11
K26DD017	Mt Nicholas	2008-07-01	HDR PL	Static	8.7826	12
K26DD017	Mt Nicholas	2008-07-01	HDR PL	Static	8.8633	13
K26DD017	Mt Nicholas	2008-07-01	HDR PL	Static	8.9235	14
K26DD017	Mt Nicholas	2008-07-01	HDR PL	Static	9.0075	15
K26DD017	Mt Nicholas	2008-07-01	HDR PL	Static	9.1581	16
K26DD017	Mt Nicholas	2008-07-01	HDR PL	Static	9.2325	17
K26DD017	Mt Nicholas	2008-07-01	HDR PL	Static	9.2939	18
K26DD017	Mt Nicholas	2008-07-01	HDR PL	Static	9.3769	19
K26DD017	Mt Nicholas	2008-07-01	HDR PL	Static	9.4388	20
K26DD017	Mt Nicholas	2008-07-01	HDR PL	Static	9.5144	21
K26DD017	Mt Nicholas	2008-07-01	HDR PL	Static	9.5658	22
K26DD017	Mt Nicholas	2008-07-01	HDR PL	Static	9.6174	23
K26DD017	Mt Nicholas	2008-07-01	HDR PL	Static	9.6583	24
K26DD017	Mt Nicholas	2008-07-01	HDR PL	Static	9.7129	25
K26DD017	Mt Nicholas	2008-07-01	HDR PL	Static	9.7485	26
K26DD017	Mt Nicholas	2008-07-01	HDR PL	Static	9.7786	27
K26DD017	Mt Nicholas	2008-07-01	HDR PL	Static	9.8336	28
K26DD017	Mt Nicholas	2008-07-01	HDR PL	Static	9.8777	29
K26DD017	Mt Nicholas	2008-07-01	HDR PL	Static	9.9274	30
K26DD017	Mt Nicholas	2008-07-01	HDR PL	Static	9.9856	31
K26DD017	Mt Nicholas	2008-07-01	HDR PL	Static	10.0384	32
K26DD017	Mt Nicholas	2008-07-01	HDR PL	Static	10.0858	33
K26DD017	Mt Nicholas	2008-07-01	HDR PL	Static	10.1305	34
K26DD017	Mt Nicholas	2008-07-01	HDR PL	Static	10.1837	35
K26DD017	Mt Nicholas	2008-07-01	HDR PL	Static	10.254	36
K26DD017	Mt Nicholas	2008-07-01	HDR PL	Static	10.2963	37
K26DD017	Mt Nicholas	2008-07-01	HDR PL	Static	10.3443	38
K26DD017	Mt Nicholas	2008-07-01	HDR PL	Static	10.3954	39
K26DD017	Mt Nicholas	2008-07-01	HDR PL	Static	10.4152	40
K26DD017	Mt Nicholas	2008-07-01	HDR PL	Static	10.4607	41
K26DD017	Mt Nicholas	2008-07-01	HDR PL	Static	10.495	42
K26DD017	Mt Nicholas	2008-07-01	HDR PL	Static	10.5321	43
K26DD017	Mt Nicholas	2008-07-01	HDR PL	Static	10.5808	44
K26DD017	Mt Nicholas	2008-07-01	HDR PL	Static	10.6209	45
K26DD017	Mt Nicholas	2008-07-01	HDR PL	Static	10.6698	46
K26DD017	Mt Nicholas	2008-07-01	HDR PL	Static	10.7218	47
K26DD017	Mt Nicholas	2008-07-01	HDR PL	Static	10.7623	48
K26DD017	Mt Nicholas	2008-07-01	HDR PL	Static	10.7941	49
K26DD017	Mt Nicholas	2008-07-01	HDR PL	Static	10.8319	50
K26DD017	Mt Nicholas	2008-07-01	HDR PL	Static	10.9047	51
K26DD017	Mt Nicholas	2008-07-01	HDR PL	Static	10.9485	52
K26DD017	Mt Nicholas	2008-07-01	HDR PL	Static	10.9953	53
K26DD017	Mt Nicholas	2008-07-01	HDR PL	Static	11.0423	54
K26DD017	Mt Nicholas	2008-07-01	HDR PL	Static	11.0924	55
K26DD017	Mt Nicholas	2008-07-01	HDR PL	Static	11.1366	56
K26DD017	Mt Nicholas	2008-07-01	HDR PL	Static	11.1751	57
K26DD017	Mt Nicholas	2008-07-01	HDR PL	Static	11.2106	58
K26DD017	Mt Nicholas	2008-07-01	HDR PL	Static	11.2433	59
K26DD017	Mt Nicholas	2008-07-01	HDR PL	Static	11.2789	60
K26DD017	Mt Nicholas	2008-07-01	HDR PL	Static	11.3296	61
K26DD017	Mt Nicholas	2008-07-01	HDR PL	Static	11.3745	62
K26DD017	Mt Nicholas	2008-07-01	HDR PL	Static	11.4074	63
K26DD017	Mt Nicholas	2008-07-01	HDR PL	Static	11.4585	64
K26DD017	Mt Nicholas	2008-07-01	HDR PL	Static	11.4855	65
K26DD017	Mt Nicholas	2008-07-01	HDR PL	Static	11.4795	66
K26DD017	Mt Nicholas	2008-07-01	HDR PL	Static	11.5156	67
K26DD017	Mt Nicholas	2008-07-01	HDR PL	Static	11.5639	68
K26DD017	Mt Nicholas	2008-07-01	HDR PL	Static	11.6033	69
K26DD017	Mt Nicholas	2008-07-01	HDR PL	Static	11.6397	70
K26DD017	Mt Nicholas	2008-07-01	HDR PL	Static	11.6883	71
K26DD017	Mt Nicholas	2008-07-01	HDR PL	Static	11.7188	72
K26DD017	Mt Nicholas	2008-07-01	HDR PL	Static	11.7554	73
K26DD017	Mt Nicholas	2008-07-01	HDR PL	Static	11.8074	74
K26DD017	Mt Nicholas	2008-07-01	HDR PL	Static	11.8411	75
K26DD017	Mt Nicholas	2008-07-01	HDR PL	Static	11.8472	76
K26DD017	Mt Nicholas	2008-07-01	HDR PL	Static	11.9612	77
K26DD017	Mt Nicholas	2008-07-01	HDR PL	Static	11.9767	78
K26DD017	Mt Nicholas	2008-07-01	HDR PL	Static	12.0417	79
K26DD017	Mt Nicholas	2008-07-01	HDR PL	Static	12.2352	80
K26DD017	Mt Nicholas	2008-07-01	HDR PL	Static	12.2634	81
K26DD017	Mt Nicholas	2008-07-01	HDR PL	Static	12.2445	82
K26DD017	Mt Nicholas	2008-07-01	HDR PL	Static	12.2759	83
K26DD017	Mt Nicholas	2008-07-01	HDR PL	Static	12.3074	84
K26DD017	Mt Nicholas	2008-07-01	HDR PL	Static	12.3388	85
K26DD017	Mt Nicholas	2008-07-01	HDR PL	Static	12.3641	86
K26DD017	Mt Nicholas	2008-07-01	HDR PL	Static	12.3546	87
K26DD017	Mt Nicholas	2008-07-01	HDR PL	Static	12.2978	88
K26DD017	Mt Nicholas	2008-07-01	HDR PL	Static	12.3829	89
K26DD017	Mt Nicholas	2008-07-01	HDR PL	Static	12.4241	90
K26DD017	Mt Nicholas	2008-07-01	HDR PL	Static	12.4748	91
K26DD017	Mt Nicholas	2008-07-01	HDR PL	Static	12.5002	92
K26DD017	Mt Nicholas	2008-07-01	HDR PL	Static	12.4938	93
K26DD017	Mt Nicholas	2008-07-01	HDR PL	Static	12.5065	94
K26DD017	Mt Nicholas	2008-07-01	HDR PL	Static	12.5767	95
K26DD017	Mt Nicholas	2008-07-01	HDR PL	Static	12.5798	96
K26DD017	Mt Nicholas	2008-07-01	HDR PL	Static	12.567	97
K26DD017	Mt Nicholas	2008-07-01	HDR PL	Static	12.5894	98
K26DD017	Mt Nicholas	2008-07-01	HDR PL	Static	12.6438	99
K26DD017	Mt Nicholas	2008-07-01	HDR PL	Static	12.7209	100
K26DD017	Mt Nicholas	2008-07-01	HDR PL	Static	12.7855	101
K26DD017	Mt Nicholas	2008-07-01	HDR PL	Static	12.8114	102
K26DD017	Mt Nicholas	2008-07-01	HDR PL	Static	12.8503	103
K26DD017	Mt Nicholas	2008-07-01	HDR PL	Static	13.0985	104
K26DD017	Mt Nicholas	2008-07-01	HDR PL	Static	13.138	105
K26DD017	Mt Nicholas	2008-07-01	HDR PL	Static	13.1678	106
K26DD017	Mt Nicholas	2008-07-01	HDR PL	Static	13.1942	107
K26DD017	Mt Nicholas	2008-07-01	HDR PL	Static	13.2273	108
K26DD017	Mt Nicholas	2008-07-01	HDR PL	Static	13.2937	109
K26DD017	Mt Nicholas	2008-07-01	HDR PL	Static	13.337	110
K26DD017	Mt Nicholas	2008-07-01	HDR PL	Static	13.3504	111
K26DD017	Mt Nicholas	2008-07-01	HDR PL	Static	13.3971	112
K26DD017	Mt Nicholas	2008-07-01	HDR PL	Static	13.4306	113
K26DD017	Mt Nicholas	2008-07-01	HDR PL	Static	13.4675	114
K26DD017	Mt Nicholas	2008-07-01	HDR PL	Static	13.5112	115
K26DD017	Mt Nicholas	2008-07-01	HDR PL	Static	13.555	116
K26DD017	Mt Nicholas	2008-07-01	HDR PL	Static	13.6428	117
K26DD017	Mt Nicholas	2008-07-01	HDR PL	Static	13.6666	118
K26DD017	Mt Nicholas	2008-07-01	HDR PL	Static	13.6802	119
K26DD017	Mt Nicholas	2008-07-01	HDR PL	Static	13.7074	120
K26DD017	Mt Nicholas	2008-07-01	HDR PL	Static	13.7312	121
K26DD017	Mt Nicholas	2008-07-01	HDR PL	Static	13.7449	122
K26DD017	Mt Nicholas	2008-07-01	HDR PL	Static	13.8405	123
K26DD017	Mt Nicholas	2008-07-01	HDR PL	Static	13.94	124
K26DD017	Mt Nicholas	2008-07-01	HDR PL	Static	13.9607	125
K26DD017	Mt Nicholas	2008-07-01	HDR PL	Static	14.0021	126
K26DD017	Mt Nicholas	2008-07-01	HDR PL	Static	14.0471	127
K26DD017	Mt Nicholas	2008-07-01	HDR PL	Static	14.0852	128
K26DD017	Mt Nicholas	2008-07-01	HDR PL	Static	14.1373	129
K26DD017	Mt Nicholas	2008-07-01	HDR PL	Static	14.1617	130
K26DD017	Mt Nicholas	2008-07-01	HDR PL	Static	14.2001	131
K26DD017	Mt Nicholas	2008-07-01	HDR PL	Static	14.242	132
K26DD017	Mt Nicholas	2008-07-01	HDR PL	Static	14.291	133
K26DD017	Mt Nicholas	2008-07-01	HDR PL	Static	14.3367	134
K26DD017	Mt Nicholas	2008-07-01	HDR PL	Static	14.3543	135
K26DD017	Mt Nicholas	2008-07-01	HDR PL	Static	14.3861	136
K26DD017	Mt Nicholas	2008-07-01	HDR PL	Static	14.3967	137
K26DD017	Mt Nicholas	2008-07-01	HDR PL	Static	14.4003	138
K26DD017	Mt Nicholas	2008-07-01	HDR PL	Static	14.4497	139
K26DD017	Mt Nicholas	2008-07-01	HDR PL	Static	14.4851	140
K26DD017	Mt Nicholas	2008-07-01	HDR PL	Static	14.51	141
K26DD017	Mt Nicholas	2008-07-01	HDR PL	Static	14.5207	142
K26DD017	Mt Nicholas	2008-07-01	HDR PL	Static	14.5598	143
K26DD017	Mt Nicholas	2008-07-01	HDR PL	Static	14.599	144
K26DD017	Mt Nicholas	2008-07-01	HDR PL	Static	14.649	145
K26DD017	Mt Nicholas	2008-07-01	HDR PL	Static	14.6848	146
K26DD017	Mt Nicholas	2008-07-01	HDR PL	Static	14.7242	147
K26DD017	Mt Nicholas	2008-07-01	HDR PL	Static	14.7458	148
K26DD017	Mt Nicholas	2008-07-01	HDR PL	Static	14.771	149
K26DD017	Mt Nicholas	2008-07-01	HDR PL	Static	14.8071	150
K26DD017	Mt Nicholas	2008-07-01	HDR PL	Static	14.8359	151
K26DD017	Mt Nicholas	2008-07-01	HDR PL	Static	14.8902	152
K26DD017	Mt Nicholas	2008-07-01	HDR PL	Static	14.9047	153
K26DD017	Mt Nicholas	2008-07-01	HDR PL	Static	14.9482	154
K26DD017	Mt Nicholas	2008-07-01	HDR PL	Static	14.9773	155
K26DD017	Mt Nicholas	2008-07-01	HDR PL	Static	15.021	156
K26DD017	Mt Nicholas	2008-07-01	HDR PL	Static	15.0757	157
K26DD017	Mt Nicholas	2008-07-01	HDR PL	Static	15.0867	158
K26DD017	Mt Nicholas	2008-07-01	HDR PL	Static	15.138	159
K26DD017	Mt Nicholas	2008-07-01	HDR PL	Static	15.1821	160
K26DD017	Mt Nicholas	2008-07-01	HDR PL	Static	15.2152	161
K26DD017	Mt Nicholas	2008-07-01	HDR PL	Static	15.2447	162
K26DD017	Mt Nicholas	2008-07-01	HDR PL	Static	15.2706	163
K26DD017	Mt Nicholas	2008-07-01	HDR PL	Static	15.278	164
K26DD017	Mt Nicholas	2008-07-01	HDR PL	Static	15.2928	165
K26DD017	Mt Nicholas	2008-07-01	HDR PL	Static	15.3077	166
K26DD017	Mt Nicholas	2008-07-01	HDR PL	Static	15.3336	167
K26DD017	Mt Nicholas	2008-07-01	HDR PL	Static	15.3707	168
K26DD017	Mt Nicholas	2008-07-01	HDR PL	Static	15.3856	169
K26DD017	Mt Nicholas	2008-07-01	HDR PL	Static	15.4042	170
K26DD017	Mt Nicholas	2008-07-01	HDR PL	Static	15.4415	171
K26DD017	Mt Nicholas	2008-07-01	HDR PL	Static	15.4676	172
K26DD017	Mt Nicholas	2008-07-01	HDR PL	Static	15.4751	173
K26DD017	Mt Nicholas	2008-07-01	HDR PL	Static	15.505	174
K26DD017	Mt Nicholas	2008-07-01	HDR PL	Static	15.5275	175
K26DD017	Mt Nicholas	2008-07-01	HDR PL	Static	15.5463	176
K26DD017	Mt Nicholas	2008-07-01	HDR PL	Static	15.565	177
K26DD017	Mt Nicholas	2008-07-01	HDR PL	Static	15.5838	178
K26DD017	Mt Nicholas	2008-07-01	HDR PL	Static	15.6026	179
K26DD017	Mt Nicholas	2008-07-01	HDR PL	Static	15.6252	180
K26DD017	Mt Nicholas	2008-07-01	HDR PL	Static	15.6667	181
K26DD017	Mt Nicholas	2008-07-01	HDR PL	Static	15.7007	182
K26DD017	Mt Nicholas	2008-07-01	HDR PL	Static	15.7234	183
K26DD017	Mt Nicholas	2008-07-01	HDR PL	Static	15.7348	184
K26DD017	Mt Nicholas	2008-07-01	HDR PL	Static	15.75	185
K26DD017	Mt Nicholas	2008-07-01	HDR PL	Static	15.769	186
K26DD017	Mt Nicholas	2008-07-01	HDR PL	Static	15.7917	187
K26DD017	Mt Nicholas	2008-07-01	HDR PL	Static	15.8146	188
K26DD017	Mt Nicholas	2008-07-01	HDR PL	Static	15.8412	189
K26DD017	Mt Nicholas	2008-07-01	HDR PL	Static	15.8527	190
K26DD017	Mt Nicholas	2008-07-01	HDR PL	Static	15.8642	191
K26DD017	Mt Nicholas	2008-07-01	HDR PL	Static	15.8832	192
K26DD017	Mt Nicholas	2008-07-01	HDR PL	Static	15.9062	193
K26DD017	Mt Nicholas	2008-07-01	HDR PL	Static	15.9215	194
K26DD017	Mt Nicholas	2008-07-01	HDR PL	Static	15.9445	195
K26DD017	Mt Nicholas	2008-07-01	HDR PL	Static	15.9637	196
K26DD017	Mt Nicholas	2008-07-01	HDR PL	Static	15.9905	197
K26DD017	Mt Nicholas	2008-07-01	HDR PL	Static	16.0021	198
K26DD017	Mt Nicholas	2008-07-01	HDR PL	Static	16.0136	199
K26DD017	Mt Nicholas	2008-07-01	HDR PL	Static	16.0483	200
K26DD017	Mt Nicholas	2008-07-01	HDR PL	Static	16.0714	201
K26DD017	Mt Nicholas	2008-07-01	HDR PL	Static	16.083	202
K26DD017	Mt Nicholas	2008-07-01	HDR PL	Static	16.1024	203
K26DD017	Mt Nicholas	2008-07-01	HDR PL	Static	16.1178	204
K26DD017	Mt Nicholas	2008-07-01	HDR PL	Static	16.1527	205
K26DD017	Mt Nicholas	2008-07-01	HDR PL	Static	16.1682	206
K26DD017	Mt Nicholas	2008-07-01	HDR PL	Static	16.1954	207
K26DD017	Mt Nicholas	2008-07-01	HDR PL	Static	16.2148	208
K26DD017	Mt Nicholas	2008-07-01	HDR PL	Static	16.2343	209
K26DD017	Mt Nicholas	2008-07-01	HDR PL	Static	16.2421	210
K26DD017	Mt Nicholas	2008-07-01	HDR PL	Static	16.25	211
K26DD017	Mt Nicholas	2008-07-01	HDR PL	Static	16.2656	212
K26DD017	Mt Nicholas	2008-07-01	HDR PL	Static	16.2812	213
K26DD017	Mt Nicholas	2008-07-01	HDR PL	Static	16.3203	214
K26DD017	Mt Nicholas	2008-07-01	HDR PL	Static	16.3437	215
K26DD017	Mt Nicholas	2008-07-01	HDR PL	Static	16.3633	216
K26DD017	Mt Nicholas	2008-07-01	HDR PL	Static	16.3908	217
K26DD017	Mt Nicholas	2008-07-01	HDR PL	Static	16.4104	218
K26DD017	Mt Nicholas	2008-07-01	HDR PL	Static	16.4301	219
K26DD017	Mt Nicholas	2008-07-01	HDR PL	Static	16.4498	220
K26DD017	Mt Nicholas	2008-07-01	HDR PL	Static	16.4695	221
K26DD017	Mt Nicholas	2008-07-01	HDR PL	Static	16.4932	222
K26DD017	Mt Nicholas	2008-07-01	HDR PL	Static	16.509	223
K26DD017	Mt Nicholas	2008-07-01	HDR PL	Static	16.5248	224
K26DD017	Mt Nicholas	2008-07-01	HDR PL	Static	16.5446	225
K26DD017	Mt Nicholas	2008-07-01	HDR PL	Static	16.5644	226
K26DD017	Mt Nicholas	2008-07-01	HDR PL	Static	16.5803	227
K26DD017	Mt Nicholas	2008-07-01	HDR PL	Static	16.6041	228
K26DD017	Mt Nicholas	2008-07-01	HDR PL	Static	16.628	229
K26DD017	Mt Nicholas	2008-07-01	HDR PL	Static	16.6479	230
K26DD017	Mt Nicholas	2008-07-01	HDR PL	Static	16.6678	231
K26DD017	Mt Nicholas	2008-07-01	HDR PL	Static	16.6917	232
K26DD017	Mt Nicholas	2008-07-01	HDR PL	Static	16.7117	233
K26DD017	Mt Nicholas	2008-07-01	HDR PL	Static	16.7356	234
K26DD017	Mt Nicholas	2008-07-01	HDR PL	Static	16.7597	235
K26DD017	Mt Nicholas	2008-07-01	HDR PL	Static	16.7757	236
K26DD017	Mt Nicholas	2008-07-01	HDR PL	Static	16.7957	237
K26DD017	Mt Nicholas	2008-07-01	HDR PL	Static	16.8158	238
K26DD017	Mt Nicholas	2008-07-01	HDR PL	Static	16.8399	239
K26DD017	Mt Nicholas	2008-07-01	HDR PL	Static	16.8762	241
K26DD017	Mt Nicholas	2008-07-01	HDR PL	Static	16.9004	242
K26DD017	Mt Nicholas	2008-07-01	HDR PL	Static	16.9205	243
K26DD017	Mt Nicholas	2008-07-01	HDR PL	Static	16.9448	244
K26DD017	Mt Nicholas	2008-07-01	HDR PL	Static	16.9771	245
K26DD017	Mt Nicholas	2008-07-01	HDR PL	Static	17.0014	246
K26DD017	Mt Nicholas	2008-07-01	HDR PL	Static	17.042	247
K26DD017	Mt Nicholas	2008-07-01	HDR PL	Static	17.0258	248
K26DD012	Woodsdale	2008-06-01	HDR PL	Static	7.096	1
K26DD012	Woodsdale	2008-06-01	HDR PL	Static	7.4402	2
K26DD012	Woodsdale	2008-06-01	HDR PL	Static	7.8849	3
K26DD012	Woodsdale	2008-06-01	HDR PL	Static	8.3891	4
K26DD012	Woodsdale	2008-06-01	HDR PL	Static	8.7202	5
K26DD012	Woodsdale	2008-06-01	HDR PL	Static	8.989	6
K26DD012	Woodsdale	2008-06-01	HDR PL	Static	9.2218	7
K26DD012	Woodsdale	2008-06-01	HDR PL	Static	9.4092	8
K26DD012	Woodsdale	2008-06-01	HDR PL	Static	9.642	9
K26DD012	Woodsdale	2008-06-01	HDR PL	Static	9.6938	10
K26DD012	Woodsdale	2008-06-01	HDR PL	Static	9.7267	11
K26DD012	Woodsdale	2008-06-01	HDR PL	Static	9.7404	12
K26DD012	Woodsdale	2008-06-01	HDR PL	Static	9.7458	13
K26DD012	Woodsdale	2008-06-01	HDR PL	Static	9.7431	14
K26DD012	Woodsdale	2008-06-01	HDR PL	Static	9.7349	15
K26DD012	Woodsdale	2008-06-01	HDR PL	Static	9.7157	16
K26DD012	Woodsdale	2008-06-01	HDR PL	Static	9.6993	17
K26DD012	Woodsdale	2008-06-01	HDR PL	Static	9.6856	18
K26DD012	Woodsdale	2008-06-01	HDR PL	Static	9.612	19
K26DD012	Woodsdale	2008-06-01	HDR PL	Static	9.6175	20
K26DD012	Woodsdale	2008-06-01	HDR PL	Static	9.6665	21
K26DD012	Woodsdale	2008-06-01	HDR PL	Static	9.6638	22
K26DD012	Woodsdale	2008-06-01	HDR PL	Static	9.6583	23
K26DD012	Woodsdale	2008-06-01	HDR PL	Static	9.6556	24
K26DD012	Woodsdale	2008-06-01	HDR PL	Static	9.7678	25
K26DD012	Woodsdale	2008-06-01	HDR PL	Static	9.787	26
K26DD012	Woodsdale	2008-06-01	HDR PL	Static	9.8117	27
K26DD012	Woodsdale	2008-06-01	HDR PL	Static	9.8145	28
K26DD012	Woodsdale	2008-06-01	HDR PL	Static	9.8117	29
K26DD012	Woodsdale	2008-06-01	HDR PL	Static	9.8117	30
K26DD012	Woodsdale	2008-06-01	HDR PL	Static	9.8145	31
K26DD012	Woodsdale	2008-06-01	HDR PL	Static	9.8172	32
K26DD012	Woodsdale	2008-06-01	HDR PL	Static	9.82	33
K26DD012	Woodsdale	2008-06-01	HDR PL	Static	9.82	34
K26DD012	Woodsdale	2008-06-01	HDR PL	Static	9.8282	35
K26DD012	Woodsdale	2008-06-01	HDR PL	Static	9.8447	36
K26DD012	Woodsdale	2008-06-01	HDR PL	Static	9.853	37
K26DD012	Woodsdale	2008-06-01	HDR PL	Static	9.8558	38
K26DD012	Woodsdale	2008-06-01	HDR PL	Static	9.8613	39
K26DD012	Woodsdale	2008-06-01	HDR PL	Static	9.864	40
K26DD012	Woodsdale	2008-06-01	HDR PL	Static	9.8889	41
K26DD012	Woodsdale	2008-06-01	HDR PL	Static	9.8971	42
K26DD012	Woodsdale	2008-06-01	HDR PL	Static	9.9027	43
K26DD012	Woodsdale	2008-06-01	HDR PL	Static	9.9054	44
K26DD012	Woodsdale	2008-06-01	HDR PL	Static	9.911	45
K26DD012	Woodsdale	2008-06-01	HDR PL	Static	9.9331	46
K26DD012	Woodsdale	2008-06-01	HDR PL	Static	9.9525	47
K26DD012	Woodsdale	2008-06-01	HDR PL	Static	9.9608	48
K26DD012	Woodsdale	2008-06-01	HDR PL	Static	9.9691	49
K26DD012	Woodsdale	2008-06-01	HDR PL	Static	9.9913	50
K26DD012	Woodsdale	2008-06-01	HDR PL	Static	9.9996	51
K26DD012	Woodsdale	2008-06-01	HDR PL	Static	10.0024	52
K26DD012	Woodsdale	2008-06-01	HDR PL	Static	10.008	53
K26DD012	Woodsdale	2008-06-01	HDR PL	Static	10.0052	54
K26DD012	Woodsdale	2008-06-01	HDR PL	Static	9.9996	55
K26DD012	Woodsdale	2008-06-01	HDR PL	Static	10.0052	56
K26DD012	Woodsdale	2008-06-01	HDR PL	Static	10.0302	57
K26DD012	Woodsdale	2008-06-01	HDR PL	Static	10.0441	58
K26DD012	Woodsdale	2008-06-01	HDR PL	Static	10.072	59
K26DD012	Woodsdale	2008-06-01	HDR PL	Static	10.0943	60
K26DD012	Woodsdale	2008-06-01	HDR PL	Static	10.1195	61
K26DD012	Woodsdale	2008-06-01	HDR PL	Static	10.1334	62
K26DD012	Woodsdale	2008-06-01	HDR PL	Static	10.1446	63
K26DD012	Woodsdale	2008-06-01	HDR PL	Static	10.1502	64
K26DD012	Woodsdale	2008-06-01	HDR PL	Static	10.1614	65
K26DD012	Woodsdale	2008-06-01	HDR PL	Static	10.1726	66
K26DD012	Woodsdale	2008-06-01	HDR PL	Static	10.1867	67
K26DD012	Woodsdale	2008-06-01	HDR PL	Static	10.2007	68
K26DD012	Woodsdale	2008-06-01	HDR PL	Static	10.2119	69
K26DD012	Woodsdale	2008-06-01	HDR PL	Static	10.2147	70
K26DD012	Woodsdale	2008-06-01	HDR PL	Static	10.2232	71
K26DD012	Woodsdale	2008-06-01	HDR PL	Static	10.2232	72
K26DD012	Woodsdale	2008-06-01	HDR PL	Static	10.2372	73
K26DD012	Woodsdale	2008-06-01	HDR PL	Static	10.2569	74
K26DD012	Woodsdale	2008-06-01	HDR PL	Static	10.2767	75
K26DD012	Woodsdale	2008-06-01	HDR PL	Static	10.2936	76
K26DD012	Woodsdale	2008-06-01	HDR PL	Static	10.319	77
K26DD012	Woodsdale	2008-06-01	HDR PL	Static	10.3473	78
K26DD012	Woodsdale	2008-06-01	HDR PL	Static	10.3558	79
K26DD012	Woodsdale	2008-06-01	HDR PL	Static	10.3615	80
K26DD012	Woodsdale	2008-06-01	HDR PL	Static	10.37	81
K26DD012	Woodsdale	2008-06-01	HDR PL	Static	10.3756	82
K26DD012	Woodsdale	2008-06-01	HDR PL	Static	10.3926	83
K26DD012	Woodsdale	2008-06-01	HDR PL	Static	10.404	84
K26DD012	Woodsdale	2008-06-01	HDR PL	Static	10.4097	85
K26DD012	Woodsdale	2008-06-01	HDR PL	Static	10.4239	86
K26DD012	Woodsdale	2008-06-01	HDR PL	Static	10.4381	87
K26DD012	Woodsdale	2008-06-01	HDR PL	Static	10.4523	88
K26DD012	Woodsdale	2008-06-01	HDR PL	Static	10.4694	89
K26DD012	Woodsdale	2008-06-01	HDR PL	Static	10.4979	90
K26DD012	Woodsdale	2008-06-01	HDR PL	Static	10.5294	91
K26DD012	Woodsdale	2008-06-01	HDR PL	Static	10.5465	92
K26DD012	Woodsdale	2008-06-01	HDR PL	Static	10.5522	93
K26DD012	Woodsdale	2008-06-01	HDR PL	Static	10.5608	94
K26DD012	Woodsdale	2008-06-01	HDR PL	Static	10.5666	95
K26DD012	Woodsdale	2008-06-01	HDR PL	Static	10.5723	96
K26DD012	Woodsdale	2008-06-01	HDR PL	Static	10.6125	97
K26DD012	Woodsdale	2008-06-01	HDR PL	Static	10.6326	98
K26DD012	Woodsdale	2008-06-01	HDR PL	Static	10.647	99
K26DD012	Woodsdale	2008-06-01	HDR PL	Static	10.6844	100
K26DD012	Woodsdale	2008-06-01	HDR PL	Static	10.6931	101
K26DD012	Woodsdale	2008-06-01	HDR PL	Static	10.6931	102
K26DD012	Woodsdale	2008-06-01	HDR PL	Static	10.7306	103
K26DD012	Woodsdale	2008-06-01	HDR PL	Static	10.7566	104
K26DD012	Woodsdale	2008-06-01	HDR PL	Static	10.774	105
K26DD012	Woodsdale	2008-06-01	HDR PL	Static	10.7885	106
K26DD012	Woodsdale	2008-06-01	HDR PL	Static	10.8088	107
K26DD012	Woodsdale	2008-06-01	HDR PL	Static	10.8292	108
K26DD012	Woodsdale	2008-06-01	HDR PL	Static	10.8466	109
K26DD012	Woodsdale	2008-06-01	HDR PL	Static	10.8583	110
K26DD012	Woodsdale	2008-06-01	HDR PL	Static	10.8728	111
K26DD012	Woodsdale	2008-06-01	HDR PL	Static	10.8845	112
K26DD012	Woodsdale	2008-06-01	HDR PL	Static	10.8961	113
K26DD012	Woodsdale	2008-06-01	HDR PL	Static	10.9166	114
K26DD012	Woodsdale	2008-06-01	HDR PL	Static	10.9429	115
K26DD012	Woodsdale	2008-06-01	HDR PL	Static	10.9604	116
K26DD012	Woodsdale	2008-06-01	HDR PL	Static	10.9927	117
K26DD012	Woodsdale	2008-06-01	HDR PL	Static	11.0044	118
K26DD012	Woodsdale	2008-06-01	HDR PL	Static	11.0191	119
K26DD012	Woodsdale	2008-06-01	HDR PL	Static	11.0396	120
K26DD012	Woodsdale	2008-06-01	HDR PL	Static	11.0691	121
K26DD012	Woodsdale	2008-06-01	HDR PL	Static	11.1015	122
K26DD012	Woodsdale	2008-06-01	HDR PL	Static	11.1192	123
K26DD012	Woodsdale	2008-06-01	HDR PL	Static	11.1428	124
K26DD012	Woodsdale	2008-06-01	HDR PL	Static	11.1635	125
K26DD012	Woodsdale	2008-06-01	HDR PL	Static	11.1754	126
K26DD012	Woodsdale	2008-06-01	HDR PL	Static	11.2139	127
K26DD012	Woodsdale	2008-06-01	HDR PL	Static	11.2883	128
K26DD012	Woodsdale	2008-06-01	HDR PL	Static	11.3002	129
K26DD012	Woodsdale	2008-06-01	HDR PL	Static	11.3121	130
K26DD012	Woodsdale	2008-06-01	HDR PL	Static	11.342	131
K26DD012	Woodsdale	2008-06-01	HDR PL	Static	11.36	132
K26DD012	Woodsdale	2008-06-01	HDR PL	Static	11.3659	133
K26DD012	Woodsdale	2008-06-01	HDR PL	Static	11.3869	134
K26DD012	Woodsdale	2008-06-01	HDR PL	Static	11.4139	135
K26DD012	Woodsdale	2008-06-01	HDR PL	Static	11.4319	136
K26DD012	Woodsdale	2008-06-01	HDR PL	Static	11.4499	137
K26DD012	Woodsdale	2008-06-01	HDR PL	Static	11.483	138
K26DD012	Woodsdale	2008-06-01	HDR PL	Static	11.5011	139
K26DD012	Woodsdale	2008-06-01	HDR PL	Static	11.5736	140
K26DD012	Woodsdale	2008-06-01	HDR PL	Static	11.613	141
K26DD012	Woodsdale	2008-06-01	HDR PL	Static	11.6312	142
K26DD012	Woodsdale	2008-06-01	HDR PL	Static	11.6585	143
K26DD012	Woodsdale	2008-06-01	HDR PL	Static	11.6951	144
K26DD012	Woodsdale	2008-06-01	HDR PL	Static	11.7225	145
K26DD012	Woodsdale	2008-06-01	HDR PL	Static	11.7439	146
K26DD012	Woodsdale	2008-06-01	HDR PL	Static	11.7928	147
K26DD012	Woodsdale	2008-06-01	HDR PL	Static	11.8327	148
K26DD012	Woodsdale	2008-06-01	HDR PL	Static	11.8665	149
K26DD012	Woodsdale	2008-06-01	HDR PL	Static	11.9219	150
K26DD012	Woodsdale	2008-06-01	HDR PL	Static	11.9466	151
K26DD012	Woodsdale	2008-06-01	HDR PL	Static	11.9806	152
K26DD012	Woodsdale	2008-06-01	HDR PL	Static	11.9961	153
K26DD012	Woodsdale	2008-06-01	HDR PL	Static	12.0209	154
K26DD012	Woodsdale	2008-06-01	HDR PL	Static	12.052	155
K26DD012	Woodsdale	2008-06-01	HDR PL	Static	12.0862	156
K26DD012	Woodsdale	2008-06-01	HDR PL	Static	12.1204	157
K26DD012	Woodsdale	2008-06-01	HDR PL	Static	12.161	158
K26DD012	Woodsdale	2008-06-01	HDR PL	Static	12.1829	159
K26DD012	Woodsdale	2008-06-01	HDR PL	Static	12.2174	160
K26DD012	Woodsdale	2008-06-01	HDR PL	Static	12.2613	161
K26DD012	Woodsdale	2008-06-01	HDR PL	Static	12.2959	162
K26DD012	Woodsdale	2008-06-01	HDR PL	Static	12.3179	163
K26DD012	Woodsdale	2008-06-01	HDR PL	Static	12.3463	164
K26DD012	Woodsdale	2008-06-01	HDR PL	Static	12.3684	165
K26DD012	Woodsdale	2008-06-01	HDR PL	Static	12.4001	166
K26DD012	Woodsdale	2008-06-01	HDR PL	Static	12.4286	167
K26DD012	Woodsdale	2008-06-01	HDR PL	Static	12.4825	168
K26DD012	Woodsdale	2008-06-01	HDR PL	Static	12.5303	169
K26DD012	Woodsdale	2008-06-01	HDR PL	Static	12.5686	170
K26DD012	Woodsdale	2008-06-01	HDR PL	Static	12.5974	171
K26DD012	Woodsdale	2008-06-01	HDR PL	Static	12.623	172
K26DD012	Woodsdale	2008-06-01	HDR PL	Static	12.6872	173
K26DD012	Woodsdale	2008-06-01	HDR PL	Static	12.7226	174
K26DD012	Woodsdale	2008-06-01	HDR PL	Static	12.7645	175
K26DD012	Woodsdale	2008-06-01	HDR PL	Static	12.7936	176
K26DD012	Woodsdale	2008-06-01	HDR PL	Static	12.8162	177
K26DD012	Woodsdale	2008-06-01	HDR PL	Static	12.8486	178
K26DD012	Woodsdale	2008-06-01	HDR PL	Static	12.8616	179
K26DD012	Woodsdale	2008-06-01	HDR PL	Static	12.8811	180
K26DD012	Woodsdale	2008-06-01	HDR PL	Static	12.9234	181
K26DD012	Woodsdale	2008-06-01	HDR PL	Static	12.9462	182
K26DD012	Woodsdale	2008-06-01	HDR PL	Static	12.9788	183
K26DD012	Woodsdale	2008-06-01	HDR PL	Static	13.0246	184
K26DD012	Woodsdale	2008-06-01	HDR PL	Static	13.0574	185
K26DD012	Woodsdale	2008-06-01	HDR PL	Static	13.1066	186
K26DD012	Woodsdale	2008-06-01	HDR PL	Static	13.1231	187
K26DD012	Woodsdale	2008-06-01	HDR PL	Static	13.156	188
K26DD012	Woodsdale	2008-06-01	HDR PL	Static	13.1725	189
K26DD012	Woodsdale	2008-06-01	HDR PL	Static	13.1989	190
K26DD012	Woodsdale	2008-06-01	HDR PL	Static	13.2221	191
K26DD012	Woodsdale	2008-06-01	HDR PL	Static	13.2817	192
K26DD012	Woodsdale	2008-06-01	HDR PL	Static	13.3382	193
K26DD012	Woodsdale	2008-06-01	HDR PL	Static	13.3549	194
K26DD012	Woodsdale	2008-06-01	HDR PL	Static	13.3749	195
K26DD012	Woodsdale	2008-06-01	HDR PL	Static	13.4116	196
K26DD012	Woodsdale	2008-06-01	HDR PL	Static	13.4518	197
K26DD012	Woodsdale	2008-06-01	HDR PL	Static	13.4819	198
K26DD012	Woodsdale	2008-06-01	HDR PL	Static	13.5223	199
K26DD012	Woodsdale	2008-06-01	HDR PL	Static	13.5761	200
K26DD012	Woodsdale	2008-06-01	HDR PL	Static	13.593	201
K26DD012	Woodsdale	2008-06-01	HDR PL	Static	13.6167	202
K26DD012	Woodsdale	2008-06-01	HDR PL	Static	13.6471	203
K26DD012	Woodsdale	2008-06-01	HDR PL	Static	13.6912	204
K26DD012	Woodsdale	2008-06-01	HDR PL	Static	13.7149	205
K26DD012	Woodsdale	2008-06-01	HDR PL	Static	13.7421	206
K26DD012	Woodsdale	2008-06-01	HDR PL	Static	13.7728	207
K26DD012	Woodsdale	2008-06-01	HDR PL	Static	13.8069	208
K26DD012	Woodsdale	2008-06-01	HDR PL	Static	13.8513	209
K26DD012	Woodsdale	2008-06-01	HDR PL	Static	13.8719	210
K26DD012	Woodsdale	2008-06-01	HDR PL	Static	13.8959	211
K26DD012	Woodsdale	2008-06-01	HDR PL	Static	13.9371	212
K26DD012	Woodsdale	2008-06-01	HDR PL	Static	13.9715	213
K26DD012	Woodsdale	2008-06-01	HDR PL	Static	14.0026	214
K26DD012	Woodsdale	2008-06-01	HDR PL	Static	14.0336	215
K26DD012	Woodsdale	2008-06-01	HDR PL	Static	14.0613	216
K26DD012	Woodsdale	2008-06-01	HDR PL	Static	14.0959	217
K26DD012	Woodsdale	2008-06-01	HDR PL	Static	14.1376	218
K26DD012	Woodsdale	2008-06-01	HDR PL	Static	14.1689	219
K26DD012	Woodsdale	2008-06-01	HDR PL	Static	14.2038	220
K26DD012	Woodsdale	2008-06-01	HDR PL	Static	14.2422	221
K26DD012	Woodsdale	2008-06-01	HDR PL	Static	14.3087	222
K26DD012	Woodsdale	2008-06-01	HDR PL	Static	14.3403	223
K26DD012	Woodsdale	2008-06-01	HDR PL	Static	14.3649	224
K26DD012	Woodsdale	2008-06-01	HDR PL	Static	14.3895	225
K26DD012	Woodsdale	2008-06-01	HDR PL	Static	14.4212	226
K26DD012	Woodsdale	2008-06-01	HDR PL	Static	14.4672	227
K26DD012	Woodsdale	2008-06-01	HDR PL	Static	14.5061	228
K26DD012	Woodsdale	2008-06-01	HDR PL	Static	14.538	229
K26DD012	Woodsdale	2008-06-01	HDR PL	Static	14.5949	230
K26DD012	Woodsdale	2008-06-01	HDR PL	Static	14.6341	231
K26DD012	Woodsdale	2008-06-01	HDR PL	Static	14.6913	232
K26DD012	Woodsdale	2008-06-01	HDR PL	Static	14.7164	233
K26DD012	Woodsdale	2008-06-01	HDR PL	Static	14.7343	234
K26DD012	Woodsdale	2008-06-01	HDR PL	Static	14.7774	235
K26DD012	Woodsdale	2008-06-01	HDR PL	Static	14.8134	236
K26DD012	Woodsdale	2008-06-01	HDR PL	Static	14.8531	237
K26DD012	Woodsdale	2008-06-01	HDR PL	Static	14.8676	238
K26DD012	Woodsdale	2008-06-01	HDR PL	Static	14.9146	239
K26DD012	Woodsdale	2008-06-01	HDR PL	Static	14.9581	240
K26DD012	Woodsdale	2008-06-01	HDR PL	Static	14.9944	241
K26DD012	Woodsdale	2008-06-01	HDR PL	Static	15.0308	242
K26DD012	Woodsdale	2008-06-01	HDR PL	Static	15.0637	243
K26DD012	Woodsdale	2008-06-01	HDR PL	Static	15.0819	244
K26DD012	Woodsdale	2008-06-01	HDR PL	Static	15.1112	245
K26DD012	Woodsdale	2008-06-01	HDR PL	Static	15.1332	246
K26DD012	Woodsdale	2008-06-01	HDR PL	Static	15.1405	247
K26DD012	Woodsdale	2008-06-01	HDR PL	Static	15.1515	248
K26DD012	Woodsdale	2008-06-01	HDR PL	Static	15.1589	249
K26DD012	Woodsdale	2008-06-01	HDR PL	Static	15.2214	250
K26DD012	Woodsdale	2008-06-01	HDR PL	Static	15.3284	251
K26DD012	Woodsdale	2008-06-01	HDR PL	Static	15.3469	252
K26DD014	Tiberias	2008-06-01	HDR PL	Static	5.8773	1
K26DD014	Tiberias	2008-06-01	HDR PL	Static	6.8594	2
K26DD014	Tiberias	2008-06-01	HDR PL	Static	7.5357	3
K26DD014	Tiberias	2008-06-01	HDR PL	Static	8.055	4
K26DD014	Tiberias	2008-06-01	HDR PL	Static	8.4795	5
K26DD014	Tiberias	2008-06-01	HDR PL	Static	8.8436	6
K26DD014	Tiberias	2008-06-01	HDR PL	Static	8.9587	7
K26DD014	Tiberias	2008-06-01	HDR PL	Static	9.1646	8
K26DD014	Tiberias	2008-06-01	HDR PL	Static	10.0707	9
K26DD014	Tiberias	2008-06-01	HDR PL	Static	9.3353	10
K26DD014	Tiberias	2008-06-01	HDR PL	Static	9.3917	11
K26DD014	Tiberias	2008-06-01	HDR PL	Static	9.3998	12
K26DD014	Tiberias	2008-06-01	HDR PL	Static	9.4375	13
K26DD014	Tiberias	2008-06-01	HDR PL	Static	9.4456	14
K26DD014	Tiberias	2008-06-01	HDR PL	Static	9.5185	15
K26DD014	Tiberias	2008-06-01	HDR PL	Static	9.5348	16
K26DD014	Tiberias	2008-06-01	HDR PL	Static	9.4996	17
K26DD014	Tiberias	2008-06-01	HDR PL	Static	9.5132	18
K26DD014	Tiberias	2008-06-01	HDR PL	Static	9.5457	19
K26DD014	Tiberias	2008-06-01	HDR PL	Static	9.6109	20
K26DD014	Tiberias	2008-06-01	HDR PL	Static	9.6736	21
K26DD014	Tiberias	2008-06-01	HDR PL	Static	10.2278	22
K26DD014	Tiberias	2008-06-01	HDR PL	Static	10.2673	23
K26DD014	Tiberias	2008-06-01	HDR PL	Static	10.2701	24
K26DD014	Tiberias	2008-06-01	HDR PL	Static	10.2984	25
K26DD014	Tiberias	2008-06-01	HDR PL	Static	10.2758	26
K26DD014	Tiberias	2008-06-01	HDR PL	Static	10.3069	27
K26DD014	Tiberias	2008-06-01	HDR PL	Static	10.2815	28
K26DD014	Tiberias	2008-06-01	HDR PL	Static	10.2844	29
K26DD014	Tiberias	2008-06-01	HDR PL	Static	10.3098	30
K26DD014	Tiberias	2008-06-01	HDR PL	Static	10.2844	31
K26DD014	Tiberias	2008-06-01	HDR PL	Static	10.2844	32
K26DD014	Tiberias	2008-06-01	HDR PL	Static	10.3127	33
K26DD014	Tiberias	2008-06-01	HDR PL	Static	10.3099	34
K26DD014	Tiberias	2008-06-01	HDR PL	Static	10.3071	35
K26DD014	Tiberias	2008-06-01	HDR PL	Static	10.3071	36
K26DD014	Tiberias	2008-06-01	HDR PL	Static	10.31	37
K26DD014	Tiberias	2008-06-01	HDR PL	Static	10.31	38
K26DD014	Tiberias	2008-06-01	HDR PL	Static	10.3128	39
K26DD014	Tiberias	2008-06-01	HDR PL	Static	10.3128	40
K26DD014	Tiberias	2008-06-01	HDR PL	Static	10.3157	41
K26DD014	Tiberias	2008-06-01	HDR PL	Static	10.3101	42
K26DD014	Tiberias	2008-06-01	HDR PL	Static	10.3101	43
K26DD014	Tiberias	2008-06-01	HDR PL	Static	10.3327	44
K26DD014	Tiberias	2008-06-01	HDR PL	Static	10.3299	45
K26DD014	Tiberias	2008-06-01	HDR PL	Static	10.3328	46
K26DD014	Tiberias	2008-06-01	HDR PL	Static	10.3356	47
K26DD014	Tiberias	2008-06-01	HDR PL	Static	10.3357	48
K26DD014	Tiberias	2008-06-01	HDR PL	Static	10.3215	49
K26DD014	Tiberias	2008-06-01	HDR PL	Static	10.3272	50
K26DD014	Tiberias	2008-06-01	HDR PL	Static	10.3357	51
K26DD014	Tiberias	2008-06-01	HDR PL	Static	10.3442	52
K26DD014	Tiberias	2008-06-01	HDR PL	Static	10.3499	53
K26DD014	Tiberias	2008-06-01	HDR PL	Static	10.3499	54
K26DD014	Tiberias	2008-06-01	HDR PL	Static	10.3528	55
K26DD014	Tiberias	2008-06-01	HDR PL	Static	10.3557	56
K26DD014	Tiberias	2008-06-01	HDR PL	Static	10.3585	57
K26DD014	Tiberias	2008-06-01	HDR PL	Static	10.3614	58
K26DD014	Tiberias	2008-06-01	HDR PL	Static	10.3671	59
K26DD014	Tiberias	2008-06-01	HDR PL	Static	10.3898	60
K26DD014	Tiberias	2008-06-01	HDR PL	Static	10.3926	61
K26DD014	Tiberias	2008-06-01	HDR PL	Static	10.3898	62
K26DD014	Tiberias	2008-06-01	HDR PL	Static	10.3927	63
K26DD014	Tiberias	2008-06-01	HDR PL	Static	10.3955	64
K26DD014	Tiberias	2008-06-01	HDR PL	Static	10.3842	65
K26DD014	Tiberias	2008-06-01	HDR PL	Static	10.3899	66
K26DD014	Tiberias	2008-06-01	HDR PL	Static	10.4041	67
K26DD014	Tiberias	2008-06-01	HDR PL	Static	10.4127	68
K26DD014	Tiberias	2008-06-01	HDR PL	Static	10.4184	69
K26DD014	Tiberias	2008-06-01	HDR PL	Static	10.4184	70
K26DD014	Tiberias	2008-06-01	HDR PL	Static	10.4213	71
K26DD014	Tiberias	2008-06-01	HDR PL	Static	10.4184	72
K26DD014	Tiberias	2008-06-01	HDR PL	Static	10.4099	73
K26DD014	Tiberias	2008-06-01	HDR PL	Static	10.41	74
K26DD014	Tiberias	2008-06-01	HDR PL	Static	10.4242	75
K26DD014	Tiberias	2008-06-01	HDR PL	Static	10.4328	76
K26DD014	Tiberias	2008-06-01	HDR PL	Static	10.4356	77
K26DD014	Tiberias	2008-06-01	HDR PL	Static	10.4413	78
K26DD014	Tiberias	2008-06-01	HDR PL	Static	10.4556	79
K26DD014	Tiberias	2008-06-01	HDR PL	Static	10.4727	80
K26DD014	Tiberias	2008-06-01	HDR PL	Static	10.4813	81
K26DD014	Tiberias	2008-06-01	HDR PL	Static	10.4899	82
K26DD014	Tiberias	2008-06-01	HDR PL	Static	10.487	83
K26DD014	Tiberias	2008-06-01	HDR PL	Static	10.4956	84
K26DD014	Tiberias	2008-06-01	HDR PL	Static	10.5042	85
K26DD014	Tiberias	2008-06-01	HDR PL	Static	10.5185	86
K26DD014	Tiberias	2008-06-01	HDR PL	Static	10.5157	87
K26DD014	Tiberias	2008-06-01	HDR PL	Static	10.5243	88
K26DD014	Tiberias	2008-06-01	HDR PL	Static	10.5243	89
K26DD014	Tiberias	2008-06-01	HDR PL	Static	10.5243	90
K26DD014	Tiberias	2008-06-01	HDR PL	Static	10.5387	91
K26DD014	Tiberias	2008-06-01	HDR PL	Static	10.5244	92
K26DD014	Tiberias	2008-06-01	HDR PL	Static	10.5244	93
K26DD014	Tiberias	2008-06-01	HDR PL	Static	10.5416	94
K26DD014	Tiberias	2008-06-01	HDR PL	Static	10.5817	95
K26DD014	Tiberias	2008-06-01	HDR PL	Static	10.5789	96
K26DD014	Tiberias	2008-06-01	HDR PL	Static	10.5588	97
K26DD014	Tiberias	2008-06-01	HDR PL	Static	10.5761	98
K26DD014	Tiberias	2008-06-01	HDR PL	Static	10.5818	99
K26DD014	Tiberias	2008-06-01	HDR PL	Static	10.6278	100
K26DD014	Tiberias	2008-06-01	HDR PL	Static	10.6768	101
K26DD014	Tiberias	2008-06-01	HDR PL	Static	10.6509	102
K26DD014	Tiberias	2008-06-01	HDR PL	Static	10.651	103
K26DD014	Tiberias	2008-06-01	HDR PL	Static	10.6654	104
K26DD014	Tiberias	2008-06-01	HDR PL	Static	10.6914	105
K26DD014	Tiberias	2008-06-01	HDR PL	Static	10.7522	106
K26DD014	Tiberias	2008-06-01	HDR PL	Static	10.7609	107
K26DD014	Tiberias	2008-06-01	HDR PL	Static	10.7783	108
K26DD014	Tiberias	2008-06-01	HDR PL	Static	10.7929	109
K26DD014	Tiberias	2008-06-01	HDR PL	Static	10.7987	110
K26DD014	Tiberias	2008-06-01	HDR PL	Static	10.8249	111
K26DD014	Tiberias	2008-06-01	HDR PL	Static	10.8541	112
K26DD014	Tiberias	2008-06-01	HDR PL	Static	10.8599	113
K26DD014	Tiberias	2008-06-01	HDR PL	Static	10.8425	114
K26DD014	Tiberias	2008-06-01	HDR PL	Static	10.8542	115
K26DD014	Tiberias	2008-06-01	HDR PL	Static	10.898	116
K26DD014	Tiberias	2008-06-01	HDR PL	Static	10.9243	117
K26DD014	Tiberias	2008-06-01	HDR PL	Static	10.9156	118
K26DD014	Tiberias	2008-06-01	HDR PL	Static	10.9127	119
K26DD014	Tiberias	2008-06-01	HDR PL	Static	10.9011	120
K26DD014	Tiberias	2008-06-01	HDR PL	Static	11.0036	121
K26DD014	Tiberias	2008-06-01	HDR PL	Static	11.0183	122
K26DD014	Tiberias	2008-06-01	HDR PL	Static	10.9978	123
K26DD014	Tiberias	2008-06-01	HDR PL	Static	11.0038	124
K26DD014	Tiberias	2008-06-01	HDR PL	Static	10.9979	125
K26DD014	Tiberias	2008-06-01	HDR PL	Static	10.9951	126
K26DD014	Tiberias	2008-06-01	HDR PL	Static	11.0127	127
K26DD014	Tiberias	2008-06-01	HDR PL	Static	11.048	128
K26DD014	Tiberias	2008-06-01	HDR PL	Static	11.0658	129
K26DD014	Tiberias	2008-06-01	HDR PL	Static	11.0805	130
K26DD014	Tiberias	2008-06-01	HDR PL	Static	11.0718	131
K26DD014	Tiberias	2008-06-01	HDR PL	Static	11.0159	132
K26DD014	Tiberias	2008-06-01	HDR PL	Static	10.9837	133
K26DD014	Tiberias	2008-06-01	HDR PL	Static	10.934	134
K26DD014	Tiberias	2008-06-01	HDR PL	Static	10.9311	135
K26DD014	Tiberias	2008-06-01	HDR PL	Static	11.0073	136
K26DD014	Tiberias	2008-06-01	HDR PL	Static	11.0191	137
K26DD014	Tiberias	2008-06-01	HDR PL	Static	11.078	138
K26DD014	Tiberias	2008-06-01	HDR PL	Static	11.0457	139
K26DD014	Tiberias	2008-06-01	HDR PL	Static	11.1549	140
K26DD014	Tiberias	2008-06-01	HDR PL	Static	11.2053	141
K26DD014	Tiberias	2008-06-01	HDR PL	Static	11.1935	142
K26DD014	Tiberias	2008-06-01	HDR PL	Static	11.2113	143
K26DD014	Tiberias	2008-06-01	HDR PL	Static	11.1788	144
K26DD014	Tiberias	2008-06-01	HDR PL	Static	11.256	145
K26DD014	Tiberias	2008-06-01	HDR PL	Static	11.2323	146
K26DD014	Tiberias	2008-06-01	HDR PL	Static	11.277	147
K26DD014	Tiberias	2008-06-01	HDR PL	Static	11.277	148
K26DD014	Tiberias	2008-06-01	HDR PL	Static	11.2771	149
K26DD014	Tiberias	2008-06-01	HDR PL	Static	11.2533	150
K26DD014	Tiberias	2008-06-01	HDR PL	Static	11.3249	151
K26DD014	Tiberias	2008-06-01	HDR PL	Static	11.4148	152
K26DD014	Tiberias	2008-06-01	HDR PL	Static	11.4358	153
K26DD014	Tiberias	2008-06-01	HDR PL	Static	11.4539	154
K26DD014	Tiberias	2008-06-01	HDR PL	Static	11.4811	155
K26DD014	Tiberias	2008-06-01	HDR PL	Static	11.4781	156
K26DD014	Tiberias	2008-06-01	HDR PL	Static	11.4601	157
K26DD014	Tiberias	2008-06-01	HDR PL	Static	11.5204	158
K26DD014	Tiberias	2008-06-01	HDR PL	Static	11.5295	159
K26DD014	Tiberias	2008-06-01	HDR PL	Static	11.5265	160
K26DD014	Tiberias	2008-06-01	HDR PL	Static	11.5266	161
K26DD014	Tiberias	2008-06-01	HDR PL	Static	11.4995	162
K26DD014	Tiberias	2008-06-01	HDR PL	Static	11.566	163
K26DD014	Tiberias	2008-06-01	HDR PL	Static	11.5993	164
K26DD014	Tiberias	2008-06-01	HDR PL	Static	11.5751	165
K26DD014	Tiberias	2008-06-01	HDR PL	Static	11.648	166
K26DD014	Tiberias	2008-06-01	HDR PL	Static	11.6723	167
K26DD014	Tiberias	2008-06-01	HDR PL	Static	11.6998	168
K26DD014	Tiberias	2008-06-01	HDR PL	Static	11.639	169
K26DD014	Tiberias	2008-06-01	HDR PL	Static	11.633	170
K26DD014	Tiberias	2008-06-01	HDR PL	Static	11.6482	171
K26DD014	Tiberias	2008-06-01	HDR PL	Static	11.7427	172
K26DD014	Tiberias	2008-06-01	HDR PL	Static	11.6879	173
K26DD014	Tiberias	2008-06-01	HDR PL	Static	11.7489	174
K26DD014	Tiberias	2008-06-01	HDR PL	Static	11.801	175
K26DD014	Tiberias	2008-06-01	HDR PL	Static	11.8133	176
K26DD014	Tiberias	2008-06-01	HDR PL	Static	11.8563	177
K26DD014	Tiberias	2008-06-01	HDR PL	Static	11.8687	178
K26DD014	Tiberias	2008-06-01	HDR PL	Static	11.838	179
K26DD014	Tiberias	2008-06-01	HDR PL	Static	11.8166	180
K26DD014	Tiberias	2008-06-01	HDR PL	Static	11.8442	181
K26DD014	Tiberias	2008-06-01	HDR PL	Static	11.8719	182
K26DD014	Tiberias	2008-06-01	HDR PL	Static	11.9182	183
K26DD014	Tiberias	2008-06-01	HDR PL	Static	11.8813	184
K26DD014	Tiberias	2008-06-01	HDR PL	Static	11.8291	185
K26DD014	Tiberias	2008-06-01	HDR PL	Static	11.8199	186
K26DD014	Tiberias	2008-06-01	HDR PL	Static	11.9184	187
K26DD014	Tiberias	2008-06-01	HDR PL	Static	11.9308	188
K26DD014	Tiberias	2008-06-01	HDR PL	Static	11.9957	189
K26DD014	Tiberias	2008-06-01	HDR PL	Static	11.9989	190
K26DD014	Tiberias	2008-06-01	HDR PL	Static	12.0672	191
K26DD014	Tiberias	2008-06-01	HDR PL	Static	12.0766	192
K26DD014	Tiberias	2008-06-01	HDR PL	Static	12.0829	193
K26DD014	Tiberias	2008-06-01	HDR PL	Static	12.1047	194
K26DD014	Tiberias	2008-06-01	HDR PL	Static	12.0892	195
K26DD014	Tiberias	2008-06-01	HDR PL	Static	12.1079	196
K26DD014	Tiberias	2008-06-01	HDR PL	Static	12.108	197
K26DD014	Tiberias	2008-06-01	HDR PL	Static	12.0862	198
K26DD014	Tiberias	2008-06-01	HDR PL	Static	12.108	199
K26DD014	Tiberias	2008-06-01	HDR PL	Static	12.2175	200
K26DD014	Tiberias	2008-06-01	HDR PL	Static	12.2269	201
K26DD014	Tiberias	2008-06-01	HDR PL	Static	12.2552	202
K26DD014	Tiberias	2008-06-01	HDR PL	Static	12.271	203
K26DD014	Tiberias	2008-06-01	HDR PL	Static	12.2176	204
K26DD014	Tiberias	2008-06-01	HDR PL	Static	12.2334	205
K26DD014	Tiberias	2008-06-01	HDR PL	Static	12.2648	206
K26DD014	Tiberias	2008-06-01	HDR PL	Static	12.199	207
K26DD014	Tiberias	2008-06-01	HDR PL	Static	12.3152	208
K26DD014	Tiberias	2008-06-01	HDR PL	Static	12.3027	209
K26DD014	Tiberias	2008-06-01	HDR PL	Static	12.3153	210
K26DD014	Tiberias	2008-06-01	HDR PL	Static	12.4228	211
K26DD014	Tiberias	2008-06-01	HDR PL	Static	12.4927	212
K26DD014	Tiberias	2008-06-01	HDR PL	Static	12.5373	213
K26DD014	Tiberias	2008-06-01	HDR PL	Static	12.5821	214
K26DD014	Tiberias	2008-06-01	HDR PL	Static	12.5374	215
K26DD014	Tiberias	2008-06-01	HDR PL	Static	12.547	216
K26DD014	Tiberias	2008-06-01	HDR PL	Static	12.5216	217
K26DD014	Tiberias	2008-06-01	HDR PL	Static	12.6142	218
K26DD014	Tiberias	2008-06-01	HDR PL	Static	12.6495	219
K26DD014	Tiberias	2008-06-01	HDR PL	Static	12.6368	220
K26DD014	Tiberias	2008-06-01	HDR PL	Static	12.64	221
K26DD014	Tiberias	2008-06-01	HDR PL	Static	12.6401	222
K26DD014	Tiberias	2008-06-01	HDR PL	Static	12.7494	223
K26DD014	Tiberias	2008-06-01	HDR PL	Static	12.7559	224
K26DD014	Tiberias	2008-06-01	HDR PL	Static	12.7915	225
K26DD014	Tiberias	2008-06-01	HDR PL	Static	12.8239	226
K26DD014	Tiberias	2008-06-01	HDR PL	Static	12.824	227
K26DD014	Tiberias	2008-06-01	HDR PL	Static	12.8208	228
K26DD014	Tiberias	2008-06-01	HDR PL	Static	12.7917	229
K26DD014	Tiberias	2008-06-01	HDR PL	Static	12.8922	230
K26DD014	Tiberias	2008-06-01	HDR PL	Static	13.1706	231
K26DD014	Tiberias	2008-06-01	HDR PL	Static	13.4499	232
K26DD014	Tiberias	2008-06-01	HDR PL	Static	13.6351	233
K26DD014	Tiberias	2008-06-01	HDR PL	Static	13.7675	234
K26DD014	Tiberias	2008-06-01	HDR PL	Static	13.8734	235
K26DD014	Tiberias	2008-06-01	HDR PL	Static	13.9559	236
K26DD014	Tiberias	2008-06-01	HDR PL	Static	13.98	237
K26DD014	Tiberias	2008-06-01	HDR PL	Static	14.0318	238
K26DD014	Tiberias	2008-06-01	HDR PL	Static	14.1358	239
K26DD014	Tiberias	2008-06-01	HDR PL	Static	14.2125	240
K26DD014	Tiberias	2008-06-01	HDR PL	Static	14.2649	241
K26DD014	Tiberias	2008-06-01	HDR PL	Static	14.307	242
K26DD014	Tiberias	2008-06-01	HDR PL	Static	14.3491	243
K26DD014	Tiberias	2008-06-01	HDR PL	Static	14.3703	244
K26DD014	Tiberias	2008-06-01	HDR PL	Static	14.4055	245
K26DD014	Tiberias	2008-06-01	HDR PL	Static	14.4373	246
K26DD014	Tiberias	2008-06-01	HDR PL	Static	14.4763	247
K26DD014	Tiberias	2008-06-01	HDR PL	Static	14.5117	248
K26DD014	Tiberias	2008-06-01	HDR PL	Static	14.5437	249
K26DD014	Tiberias	2008-06-01	HDR PL	Static	14.5757	250
K26DD014	Tiberias	2008-06-01	HDR PL	Static	14.6078	251
K26DD014	Tiberias	2008-06-01	HDR PL	Static	14.6471	252
K26DD014	Tiberias	2008-06-01	HDR PL	Static	14.6686	253
K26DD018	Frankford	2008-08-01	HDR PL	Static	1.848	1
K26DD018	Frankford	2008-08-01	HDR PL	Static	3.7116	2
K26DD018	Frankford	2008-08-01	HDR PL	Static	4.9421	3
K26DD018	Frankford	2008-08-01	HDR PL	Static	8.4692	4
K26DD018	Frankford	2008-08-01	HDR PL	Static	10.1294	5
K26DD018	Frankford	2008-08-01	HDR PL	Static	10.1016	6
K26DD018	Frankford	2008-08-01	HDR PL	Static	10.2083	7
K26DD018	Frankford	2008-08-01	HDR PL	Static	10.1663	8
K26DD018	Frankford	2008-08-01	HDR PL	Static	10.077	9
K26DD018	Frankford	2008-08-01	HDR PL	Static	9.9992	10
K26DD018	Frankford	2008-08-01	HDR PL	Static	9.991	11
K26DD018	Frankford	2008-08-01	HDR PL	Static	9.9717	12
K26DD018	Frankford	2008-08-01	HDR PL	Static	9.958	13
K26DD018	Frankford	2008-08-01	HDR PL	Static	9.9471	14
K26DD018	Frankford	2008-08-01	HDR PL	Static	9.9417	15
K26DD018	Frankford	2008-08-01	HDR PL	Static	9.9474	16
K26DD018	Frankford	2008-08-01	HDR PL	Static	9.9476	17
K26DD018	Frankford	2008-08-01	HDR PL	Static	9.9477	18
K26DD018	Frankford	2008-08-01	HDR PL	Static	9.9479	19
K26DD018	Frankford	2008-08-01	HDR PL	Static	9.9481	20
K26DD018	Frankford	2008-08-01	HDR PL	Static	9.9538	21
K26DD018	Frankford	2008-08-01	HDR PL	Static	9.9512	22
K26DD018	Frankford	2008-08-01	HDR PL	Static	9.9541	23
K26DD018	Frankford	2008-08-01	HDR PL	Static	9.957	24
K26DD018	Frankford	2008-08-01	HDR PL	Static	9.9572	25
K26DD018	Frankford	2008-08-01	HDR PL	Static	9.9601	26
K26DD018	Frankford	2008-08-01	HDR PL	Static	9.9631	27
K26DD018	Frankford	2008-08-01	HDR PL	Static	9.966	28
K26DD018	Frankford	2008-08-01	HDR PL	Static	9.9717	29
K26DD018	Frankford	2008-08-01	HDR PL	Static	9.9747	30
K26DD018	Frankford	2008-08-01	HDR PL	Static	9.9804	31
K26DD018	Frankford	2008-08-01	HDR PL	Static	10.0028	32
K26DD018	Frankford	2008-08-01	HDR PL	Static	10.0224	33
K26DD018	Frankford	2008-08-01	HDR PL	Static	10.0309	34
K26DD018	Frankford	2008-08-01	HDR PL	Static	10.0478	35
K26DD018	Frankford	2008-08-01	HDR PL	Static	10.0619	36
K26DD018	Frankford	2008-08-01	HDR PL	Static	10.0648	37
K26DD018	Frankford	2008-08-01	HDR PL	Static	10.0761	38
K26DD018	Frankford	2008-08-01	HDR PL	Static	10.0875	39
K26DD018	Frankford	2008-08-01	HDR PL	Static	10.0988	40
K26DD018	Frankford	2008-08-01	HDR PL	Static	10.1241	41
K26DD018	Frankford	2008-08-01	HDR PL	Static	10.1467	42
K26DD018	Frankford	2008-08-01	HDR PL	Static	10.1889	43
K26DD018	Frankford	2008-08-01	HDR PL	Static	10.22	44
K26DD018	Frankford	2008-08-01	HDR PL	Static	10.2286	45
K26DD018	Frankford	2008-08-01	HDR PL	Static	10.2344	46
K26DD018	Frankford	2008-08-01	HDR PL	Static	10.2627	47
K26DD018	Frankford	2008-08-01	HDR PL	Static	10.277	48
K26DD018	Frankford	2008-08-01	HDR PL	Static	10.3054	49
K26DD018	Frankford	2008-08-01	HDR PL	Static	10.3282	50
K26DD018	Frankford	2008-08-01	HDR PL	Static	10.3538	51
K26DD018	Frankford	2008-08-01	HDR PL	Static	10.3767	52
K26DD018	Frankford	2008-08-01	HDR PL	Static	10.4109	53
K26DD018	Frankford	2008-08-01	HDR PL	Static	10.4366	54
K26DD018	Frankford	2008-08-01	HDR PL	Static	10.4653	55
K26DD018	Frankford	2008-08-01	HDR PL	Static	10.4854	56
K26DD018	Frankford	2008-08-01	HDR PL	Static	10.5056	57
K26DD018	Frankford	2008-08-01	HDR PL	Static	10.5372	58
K26DD018	Frankford	2008-08-01	HDR PL	Static	10.5488	59
K26DD018	Frankford	2008-08-01	HDR PL	Static	10.5575	60
K26DD018	Frankford	2008-08-01	HDR PL	Static	10.5778	61
K26DD018	Frankford	2008-08-01	HDR PL	Static	10.6124	62
K26DD018	Frankford	2008-08-01	HDR PL	Static	10.6384	63
K26DD018	Frankford	2008-08-01	HDR PL	Static	10.6789	64
K26DD018	Frankford	2008-08-01	HDR PL	Static	10.7022	65
K26DD018	Frankford	2008-08-01	HDR PL	Static	10.7341	66
K26DD018	Frankford	2008-08-01	HDR PL	Static	10.7516	67
K26DD018	Frankford	2008-08-01	HDR PL	Static	10.7721	68
K26DD018	Frankford	2008-08-01	HDR PL	Static	10.8042	69
K26DD018	Frankford	2008-08-01	HDR PL	Static	10.8247	70
K26DD018	Frankford	2008-08-01	HDR PL	Static	10.8306	71
K26DD018	Frankford	2008-08-01	HDR PL	Static	10.8716	72
K26DD018	Frankford	2008-08-01	HDR PL	Static	10.9038	73
K26DD018	Frankford	2008-08-01	HDR PL	Static	10.9507	74
K26DD018	Frankford	2008-08-01	HDR PL	Static	10.9655	75
K26DD018	Frankford	2008-08-01	HDR PL	Static	11.0068	76
K26DD018	Frankford	2008-08-01	HDR PL	Static	11.054	77
K26DD018	Frankford	2008-08-01	HDR PL	Static	11.0659	78
K26DD018	Frankford	2008-08-01	HDR PL	Static	11.0779	79
K26DD018	Frankford	2008-08-01	HDR PL	Static	11.0928	80
K26DD018	Frankford	2008-08-01	HDR PL	Static	11.1077	81
K26DD018	Frankford	2008-08-01	HDR PL	Static	11.1611	82
K26DD018	Frankford	2008-08-01	HDR PL	Static	11.179	83
K26DD018	Frankford	2008-08-01	HDR PL	Static	11.2148	84
K26DD018	Frankford	2008-08-01	HDR PL	Static	11.2625	85
K26DD018	Frankford	2008-08-01	HDR PL	Static	11.2805	86
K26DD018	Frankford	2008-08-01	HDR PL	Static	11.3135	87
K26DD018	Frankford	2008-08-01	HDR PL	Static	11.3555	88
K26DD018	Frankford	2008-08-01	HDR PL	Static	11.3736	89
K26DD018	Frankford	2008-08-01	HDR PL	Static	11.4188	90
K26DD018	Frankford	2008-08-01	HDR PL	Static	11.44	91
K26DD018	Frankford	2008-08-01	HDR PL	Static	11.4432	92
K26DD018	Frankford	2008-08-01	HDR PL	Static	11.4794	93
K26DD018	Frankford	2008-08-01	HDR PL	Static	11.5128	94
K26DD018	Frankford	2008-08-01	HDR PL	Static	11.5431	95
K26DD018	Frankford	2008-08-01	HDR PL	Static	11.5857	96
K26DD018	Frankford	2008-08-01	HDR PL	Static	11.6192	97
K26DD018	Frankford	2008-08-01	HDR PL	Static	11.6346	98
K26DD018	Frankford	2008-08-01	HDR PL	Static	11.6499	99
K26DD018	Frankford	2008-08-01	HDR PL	Static	11.6683	100
K26DD018	Frankford	2008-08-01	HDR PL	Static	11.6988	101
K26DD018	Frankford	2008-08-01	HDR PL	Static	11.7202	102
K26DD018	Frankford	2008-08-01	HDR PL	Static	11.7447	103
K26DD018	Frankford	2008-08-01	HDR PL	Static	11.7723	104
K26DD018	Frankford	2008-08-01	HDR PL	Static	11.7815	105
K26DD018	Frankford	2008-08-01	HDR PL	Static	11.8613	106
K26DD018	Frankford	2008-08-01	HDR PL	Static	11.9322	107
K26DD018	Frankford	2008-08-01	HDR PL	Static	11.9817	108
K26DD018	Frankford	2008-08-01	HDR PL	Static	12.0034	109
K26DD018	Frankford	2008-08-01	HDR PL	Static	12.0344	110
K26DD018	Frankford	2008-08-01	HDR PL	Static	12.0562	111
K26DD018	Frankford	2008-08-01	HDR PL	Static	12.0874	112
K26DD018	Frankford	2008-08-01	HDR PL	Static	12.1123	113
K26DD018	Frankford	2008-08-01	HDR PL	Static	12.1436	114
K26DD018	Frankford	2008-08-01	HDR PL	Static	12.1686	115
K26DD018	Frankford	2008-08-01	HDR PL	Static	12.1843	116
K26DD018	Frankford	2008-08-01	HDR PL	Static	12.2407	117
K26DD018	Frankford	2008-08-01	HDR PL	Static	12.269	118
K26DD018	Frankford	2008-08-01	HDR PL	Static	12.2942	119
K26DD018	Frankford	2008-08-01	HDR PL	Static	12.3321	120
K26DD018	Frankford	2008-08-01	HDR PL	Static	12.3637	121
K26DD018	Frankford	2008-08-01	HDR PL	Static	12.3922	122
K26DD018	Frankford	2008-08-01	HDR PL	Static	12.4176	123
K26DD018	Frankford	2008-08-01	HDR PL	Static	12.4525	124
K26DD018	Frankford	2008-08-01	HDR PL	Static	12.4716	125
K26DD018	Frankford	2008-08-01	HDR PL	Static	12.5034	126
K26DD018	Frankford	2008-08-01	HDR PL	Static	12.5226	127
K26DD018	Frankford	2008-08-01	HDR PL	Static	12.5545	128
K26DD018	Frankford	2008-08-01	HDR PL	Static	12.5801	129
K26DD018	Frankford	2008-08-01	HDR PL	Static	12.6442	130
K26DD018	Frankford	2008-08-01	HDR PL	Static	12.6635	131
K26DD018	Frankford	2008-08-01	HDR PL	Static	12.686	132
K26DD018	Frankford	2008-08-01	HDR PL	Static	12.7118	133
K26DD018	Frankford	2008-08-01	HDR PL	Static	12.7312	134
K26DD018	Frankford	2008-08-01	HDR PL	Static	12.7603	135
K26DD018	Frankford	2008-08-01	HDR PL	Static	12.7958	136
K26DD018	Frankford	2008-08-01	HDR PL	Static	12.8444	137
K26DD018	Frankford	2008-08-01	HDR PL	Static	12.8867	138
K26DD018	Frankford	2008-08-01	HDR PL	Static	12.8965	139
K26DD018	Frankford	2008-08-01	HDR PL	Static	12.9421	140
K26DD018	Frankford	2008-08-01	HDR PL	Static	12.965	141
K26DD018	Frankford	2008-08-01	HDR PL	Static	12.9879	142
K26DD018	Frankford	2008-08-01	HDR PL	Static	13.037	143
K26DD018	Frankford	2008-08-01	HDR PL	Static	13.0567	144
K26DD018	Frankford	2008-08-01	HDR PL	Static	13.0896	145
K26DD018	Frankford	2008-08-01	HDR PL	Static	13.1192	146
K26DD018	Frankford	2008-08-01	HDR PL	Static	13.1489	147
K26DD018	Frankford	2008-08-01	HDR PL	Static	13.1918	148
K26DD018	Frankford	2008-08-01	HDR PL	Static	13.2183	149
K26DD018	Frankford	2008-08-01	HDR PL	Static	13.2614	150
K26DD018	Frankford	2008-08-01	HDR PL	Static	13.3081	151
K26DD018	Frankford	2008-08-01	HDR PL	Static	13.3349	152
K26DD018	Frankford	2008-08-01	HDR PL	Static	13.3617	153
K26DD018	Frankford	2008-08-01	HDR PL	Static	13.3952	154
K26DD018	Frankford	2008-08-01	HDR PL	Static	13.4355	155
K26DD018	Frankford	2008-08-01	HDR PL	Static	13.4625	156
K26DD018	Frankford	2008-08-01	HDR PL	Static	13.4728	157
K26DD018	Frankford	2008-08-01	HDR PL	Static	13.52	158
K26DD018	Frankford	2008-08-01	HDR PL	Static	13.5471	159
K26DD018	Frankford	2008-08-01	HDR PL	Static	13.5776	160
K26DD018	Frankford	2008-08-01	HDR PL	Static	13.625	161
K26DD018	Frankford	2008-08-01	HDR PL	Static	13.6896	162
K26DD018	Frankford	2008-08-01	HDR PL	Static	13.7237	163
K26DD018	Frankford	2008-08-01	HDR PL	Static	13.7545	164
K26DD018	Frankford	2008-08-01	HDR PL	Static	13.8058	165
K26DD018	Frankford	2008-08-01	HDR PL	Static	13.8334	166
K26DD018	Frankford	2008-08-01	HDR PL	Static	13.8541	167
K26DD018	Frankford	2008-08-01	HDR PL	Static	13.8851	168
K26DD018	Frankford	2008-08-01	HDR PL	Static	13.8922	169
K26DD018	Frankford	2008-08-01	HDR PL	Static	13.8923	170
K26DD018	Frankford	2008-08-01	HDR PL	Static	13.9234	171
K26DD018	Frankford	2008-08-01	HDR PL	Static	13.9477	172
K26DD018	Frankford	2008-08-01	HDR PL	Static	13.9685	173
K26DD018	Frankford	2008-08-01	HDR PL	Static	13.9963	174
K26DD018	Frankford	2008-08-01	HDR PL	Static	14.0275	175
K26DD018	Frankford	2008-08-01	HDR PL	Static	14.0762	176
K26DD018	Frankford	2008-08-01	HDR PL	Static	14.0937	177
K26DD018	Frankford	2008-08-01	HDR PL	Static	14.1112	178
K26DD018	Frankford	2008-08-01	HDR PL	Static	14.1566	179
K26DD018	Frankford	2008-08-01	HDR PL	Static	14.1846	180
K26DD018	Frankford	2008-08-01	HDR PL	Static	14.2266	181
K26DD018	Frankford	2008-08-01	HDR PL	Static	14.2548	182
K26DD018	Frankford	2008-08-01	HDR PL	Static	14.297	183
K26DD018	Frankford	2008-08-01	HDR PL	Static	14.3288	184
K26DD018	Frankford	2008-08-01	HDR PL	Static	14.3676	185
K26DD018	Frankford	2008-08-01	HDR PL	Static	14.3995	186
K26DD018	Frankford	2008-08-01	HDR PL	Static	14.4279	187
K26DD018	Frankford	2008-08-01	HDR PL	Static	14.4599	188
K26DD018	Frankford	2008-08-01	HDR PL	Static	14.4955	189
K26DD018	Frankford	2008-08-01	HDR PL	Static	14.5276	190
K26DD018	Frankford	2008-08-01	HDR PL	Static	14.5704	191
K26DD018	Frankford	2008-08-01	HDR PL	Static	14.6062	192
K26DD018	Frankford	2008-08-01	HDR PL	Static	14.6456	193
K26DD018	Frankford	2008-08-01	HDR PL	Static	14.6708	194
K26DD018	Frankford	2008-08-01	HDR PL	Static	14.7068	195
K26DD018	Frankford	2008-08-01	HDR PL	Static	14.7213	196
K26DD018	Frankford	2008-08-01	HDR PL	Static	14.7466	197
K26DD018	Frankford	2008-08-01	HDR PL	Static	14.772	198
K26DD018	Frankford	2008-08-01	HDR PL	Static	14.783	199
K26DD018	Frankford	2008-08-01	HDR PL	Static	14.8192	200
K26DD018	Frankford	2008-08-01	HDR PL	Static	14.841	201
K26DD018	Frankford	2008-08-01	HDR PL	Static	14.8665	202
K26DD018	Frankford	2008-08-01	HDR PL	Static	14.9172	203
K26DD018	Frankford	2008-08-01	HDR PL	Static	14.9282	204
K26DD018	Frankford	2008-08-01	HDR PL	Static	14.9429	205
K26DD018	Frankford	2008-08-01	HDR PL	Static	14.9575	206
K26DD018	Frankford	2008-08-01	HDR PL	Static	14.9722	207
K26DD018	Frankford	2008-08-01	HDR PL	Static	14.965	208
K26DD018	Frankford	2008-08-01	HDR PL	Static	14.9833	209
K26DD018	Frankford	2008-08-01	HDR PL	Static	15.0089	210
K26DD018	Frankford	2008-08-01	HDR PL	Static	15.0455	211
K26DD018	Frankford	2008-08-01	HDR PL	Static	15.0711	212
K26DD018	Frankford	2008-08-01	HDR PL	Static	15.1078	213
K26DD018	Frankford	2008-08-01	HDR PL	Static	15.1226	214
K26DD018	Frankford	2008-08-01	HDR PL	Static	15.1447	215
K26DD018	Frankford	2008-08-01	HDR PL	Static	15.1779	216
K26DD018	Frankford	2008-08-01	HDR PL	Static	15.2074	217
K26DD018	Frankford	2008-08-01	HDR PL	Static	15.2259	218
K26DD018	Frankford	2008-08-01	HDR PL	Static	15.2371	219
K26DD018	Frankford	2008-08-01	HDR PL	Static	15.2446	220
K26DD018	Frankford	2008-08-01	HDR PL	Static	15.2743	221
K26DD018	Frankford	2008-08-01	HDR PL	Static	15.2818	222
K26DD018	Frankford	2008-08-01	HDR PL	Static	15.3078	223
K26DD018	Frankford	2008-08-01	HDR PL	Static	15.3116	224
K26DD018	Frankford	2008-08-01	HDR PL	Static	15.3376	225
K26DD018	Frankford	2008-08-01	HDR PL	Static	15.3489	226
K26DD018	Frankford	2008-08-01	HDR PL	Static	15.3676	227
K26DD018	Frankford	2008-08-01	HDR PL	Static	15.4011	228
K26DD018	Frankford	2008-08-01	HDR PL	Static	15.4161	229
K26DD018	Frankford	2008-08-01	HDR PL	Static	15.4274	230
K26DD018	Frankford	2008-08-01	HDR PL	Static	15.4611	231
K26DD018	Frankford	2008-08-01	HDR PL	Static	15.4873	232
K26DD018	Frankford	2008-08-01	HDR PL	Static	15.5024	233
K26DD018	Frankford	2008-08-01	HDR PL	Static	15.525	234
K26DD018	Frankford	2008-08-01	HDR PL	Static	15.5401	235
K26DD018	Frankford	2008-08-01	HDR PL	Static	15.5664	236
K26DD018	Frankford	2008-08-01	HDR PL	Static	15.5703	237
K26DD018	Frankford	2008-08-01	HDR PL	Static	15.5929	238
K26DD018	Frankford	2008-08-01	HDR PL	Static	15.6156	239
K26DD018	Frankford	2008-08-01	HDR PL	Static	15.6421	240
K26DD018	Frankford	2008-08-01	HDR PL	Static	15.6799	241
K26DD018	Frankford	2008-08-01	HDR PL	Static	15.7064	242
K26DD018	Frankford	2008-08-01	HDR PL	Static	15.7406	243
K26DD018	Frankford	2008-08-01	HDR PL	Static	15.7748	244
K26DD018	Frankford	2008-08-01	HDR PL	Static	15.7977	245
K26DD018	Frankford	2008-08-01	HDR PL	Static	15.8206	246
K26DD018	Frankford	2008-08-01	HDR PL	Static	15.836	247
K26DD018	Frankford	2008-08-01	HDR PL	Static	15.8704	248
K26DD018	Frankford	2008-08-01	HDR PL	Static	15.8934	249
K26DD006c	Fingal	2008-05-01	HDR PL	Static	7.4182	1
K26DD006c	Fingal	2008-05-01	HDR PL	Static	8.3278	2
K26DD006c	Fingal	2008-05-01	HDR PL	Static	8.8551	3
K26DD006c	Fingal	2008-05-01	HDR PL	Static	9.331	4
K26DD006c	Fingal	2008-05-01	HDR PL	Static	9.7072	5
K26DD006c	Fingal	2008-05-01	HDR PL	Static	9.8886	6
K26DD006c	Fingal	2008-05-01	HDR PL	Static	10.0078	7
K26DD006c	Fingal	2008-05-01	HDR PL	Static	10.0858	8
K26DD006c	Fingal	2008-05-01	HDR PL	Static	10.153	9
K26DD006c	Fingal	2008-05-01	HDR PL	Static	10.1979	10
K26DD006c	Fingal	2008-05-01	HDR PL	Static	10.2119	11
K26DD006c	Fingal	2008-05-01	HDR PL	Static	10.2345	12
K26DD006c	Fingal	2008-05-01	HDR PL	Static	10.1895	13
K26DD006c	Fingal	2008-05-01	HDR PL	Static	10.2064	14
K26DD006c	Fingal	2008-05-01	HDR PL	Static	10.2092	15
K26DD006c	Fingal	2008-05-01	HDR PL	Static	10.184	16
K26DD006c	Fingal	2008-05-01	HDR PL	Static	10.1587	17
K26DD006c	Fingal	2008-05-01	HDR PL	Static	10.1644	18
K26DD006c	Fingal	2008-05-01	HDR PL	Static	10.156	19
K26DD006c	Fingal	2008-05-01	HDR PL	Static	10.1196	20
K26DD006c	Fingal	2008-05-01	HDR PL	Static	10.0833	21
K26DD006c	Fingal	2008-05-01	HDR PL	Static	10.061	22
K26DD006c	Fingal	2008-05-01	HDR PL	Static	10.0471	23
K26DD006c	Fingal	2008-05-01	HDR PL	Static	10.036	24
K26DD006c	Fingal	2008-05-01	HDR PL	Static	10.0248	25
K26DD006c	Fingal	2008-05-01	HDR PL	Static	10.0165	26
K26DD006c	Fingal	2008-05-01	HDR PL	Static	10.0026	27
K26DD006c	Fingal	2008-05-01	HDR PL	Static	9.9777	28
K26DD006c	Fingal	2008-05-01	HDR PL	Static	9.9721	29
K26DD006c	Fingal	2008-05-01	HDR PL	Static	9.9666	30
K26DD006c	Fingal	2008-05-01	HDR PL	Static	9.9639	31
K26DD006c	Fingal	2008-05-01	HDR PL	Static	9.9583	32
K26DD006c	Fingal	2008-05-01	HDR PL	Static	9.9528	33
K26DD006c	Fingal	2008-05-01	HDR PL	Static	9.9445	34
K26DD006c	Fingal	2008-05-01	HDR PL	Static	9.9418	35
K26DD006c	Fingal	2008-05-01	HDR PL	Static	9.939	36
K26DD006c	Fingal	2008-05-01	HDR PL	Static	9.9363	37
K26DD006c	Fingal	2008-05-01	HDR PL	Static	9.9363	38
K26DD006c	Fingal	2008-05-01	HDR PL	Static	9.9391	39
K26DD006c	Fingal	2008-05-01	HDR PL	Static	9.9419	40
K26DD006c	Fingal	2008-05-01	HDR PL	Static	9.9447	41
K26DD006c	Fingal	2008-05-01	HDR PL	Static	9.9502	42
K26DD006c	Fingal	2008-05-01	HDR PL	Static	9.9558	43
K26DD006c	Fingal	2008-05-01	HDR PL	Static	9.9613	44
K26DD006c	Fingal	2008-05-01	HDR PL	Static	9.9669	45
K26DD006c	Fingal	2008-05-01	HDR PL	Static	9.9836	46
K26DD006c	Fingal	2008-05-01	HDR PL	Static	9.9975	47
K26DD006c	Fingal	2008-05-01	HDR PL	Static	10.0059	48
K26DD006c	Fingal	2008-05-01	HDR PL	Static	10.0226	49
K26DD006c	Fingal	2008-05-01	HDR PL	Static	10.0393	50
K26DD006c	Fingal	2008-05-01	HDR PL	Static	10.0755	51
K26DD006c	Fingal	2008-05-01	HDR PL	Static	10.1735	52
K26DD006c	Fingal	2008-05-01	HDR PL	Static	10.1903	53
K26DD006c	Fingal	2008-05-01	HDR PL	Static	10.1932	54
K26DD006c	Fingal	2008-05-01	HDR PL	Static	10.1932	55
K26DD006c	Fingal	2008-05-01	HDR PL	Static	10.2044	56
K26DD006c	Fingal	2008-05-01	HDR PL	Static	10.2185	57
K26DD006c	Fingal	2008-05-01	HDR PL	Static	10.2608	58
K26DD006c	Fingal	2008-05-01	HDR PL	Static	10.3201	59
K26DD006c	Fingal	2008-05-01	HDR PL	Static	10.4279	60
K26DD006c	Fingal	2008-05-01	HDR PL	Static	10.4478	61
K26DD006c	Fingal	2008-05-01	HDR PL	Static	10.4678	62
K26DD006c	Fingal	2008-05-01	HDR PL	Static	10.4735	63
K26DD006c	Fingal	2008-05-01	HDR PL	Static	10.4849	64
K26DD006c	Fingal	2008-05-01	HDR PL	Static	10.4935	65
K26DD006c	Fingal	2008-05-01	HDR PL	Static	10.5107	66
K26DD006c	Fingal	2008-05-01	HDR PL	Static	10.5135	67
K26DD006c	Fingal	2008-05-01	HDR PL	Static	10.4936	68
K26DD006c	Fingal	2008-05-01	HDR PL	Static	10.5164	69
K26DD006c	Fingal	2008-05-01	HDR PL	Static	10.5852	70
K26DD006c	Fingal	2008-05-01	HDR PL	Static	10.6427	71
K26DD006c	Fingal	2008-05-01	HDR PL	Static	10.6571	72
K26DD006c	Fingal	2008-05-01	HDR PL	Static	10.66	73
K26DD006c	Fingal	2008-05-01	HDR PL	Static	10.6456	74
K26DD006c	Fingal	2008-05-01	HDR PL	Static	10.6399	75
K26DD006c	Fingal	2008-05-01	HDR PL	Static	10.7351	76
K26DD006c	Fingal	2008-05-01	HDR PL	Static	10.8337	77
K26DD006c	Fingal	2008-05-01	HDR PL	Static	10.9358	78
K26DD006c	Fingal	2008-05-01	HDR PL	Static	10.9651	79
K26DD006c	Fingal	2008-05-01	HDR PL	Static	10.9886	80
K26DD006c	Fingal	2008-05-01	HDR PL	Static	11.0121	81
K26DD006c	Fingal	2008-05-01	HDR PL	Static	11.0209	82
K26DD006c	Fingal	2008-05-01	HDR PL	Static	11.0268	83
K26DD006c	Fingal	2008-05-01	HDR PL	Static	11.0268	84
K26DD006c	Fingal	2008-05-01	HDR PL	Static	11.1005	85
K26DD006c	Fingal	2008-05-01	HDR PL	Static	11.1182	86
K26DD006c	Fingal	2008-05-01	HDR PL	Static	11.1271	87
K26DD006c	Fingal	2008-05-01	HDR PL	Static	11.1419	88
K26DD006c	Fingal	2008-05-01	HDR PL	Static	11.1982	89
K26DD006c	Fingal	2008-05-01	HDR PL	Static	11.2041	90
K26DD006c	Fingal	2008-05-01	HDR PL	Static	11.2071	91
K26DD006c	Fingal	2008-05-01	HDR PL	Static	11.2874	92
K26DD006c	Fingal	2008-05-01	HDR PL	Static	11.3382	93
K26DD006c	Fingal	2008-05-01	HDR PL	Static	11.4011	94
K26DD006c	Fingal	2008-05-01	HDR PL	Static	11.4311	95
K26DD006c	Fingal	2008-05-01	HDR PL	Static	11.4733	96
K26DD006c	Fingal	2008-05-01	HDR PL	Static	11.5185	97
K26DD006c	Fingal	2008-05-01	HDR PL	Static	11.5095	98
K26DD006c	Fingal	2008-05-01	HDR PL	Static	11.5487	99
K26DD006c	Fingal	2008-05-01	HDR PL	Static	11.6336	100
K26DD006c	Fingal	2008-05-01	HDR PL	Static	11.7036	101
K26DD006c	Fingal	2008-05-01	HDR PL	Static	11.7709	102
K26DD006c	Fingal	2008-05-01	HDR PL	Static	11.7801	103
K26DD006c	Fingal	2008-05-01	HDR PL	Static	11.7954	104
K26DD006c	Fingal	2008-05-01	HDR PL	Static	11.8353	105
K26DD006c	Fingal	2008-05-01	HDR PL	Static	11.8938	106
K26DD006c	Fingal	2008-05-01	HDR PL	Static	11.9123	107
K26DD006c	Fingal	2008-05-01	HDR PL	Static	11.9371	108
K26DD006c	Fingal	2008-05-01	HDR PL	Static	11.9186	109
K26DD006c	Fingal	2008-05-01	HDR PL	Static	11.9248	110
K26DD006c	Fingal	2008-05-01	HDR PL	Static	11.9372	111
K26DD006c	Fingal	2008-05-01	HDR PL	Static	11.9403	112
K26DD006c	Fingal	2008-05-01	HDR PL	Static	12.0425	113
K26DD006c	Fingal	2008-05-01	HDR PL	Static	12.0736	114
K26DD006c	Fingal	2008-05-01	HDR PL	Static	12.1829	115
K26DD006c	Fingal	2008-05-01	HDR PL	Static	12.2048	116
K26DD006c	Fingal	2008-05-01	HDR PL	Static	12.2017	117
K26DD006c	Fingal	2008-05-01	HDR PL	Static	12.2457	118
K26DD006c	Fingal	2008-05-01	HDR PL	Static	12.3338	119
K26DD006c	Fingal	2008-05-01	HDR PL	Static	12.435	120
K26DD006c	Fingal	2008-05-01	HDR PL	Static	12.4986	121
K26DD006c	Fingal	2008-05-01	HDR PL	Static	12.5401	122
K26DD006c	Fingal	2008-05-01	HDR PL	Static	12.6232	123
K26DD006c	Fingal	2008-05-01	HDR PL	Static	12.6489	124
K26DD006c	Fingal	2008-05-01	HDR PL	Static	12.649	125
K26DD006c	Fingal	2008-05-01	HDR PL	Static	12.7294	126
K26DD006c	Fingal	2008-05-01	HDR PL	Static	12.752	127
K26DD006c	Fingal	2008-05-01	HDR PL	Static	12.7649	128
K26DD006c	Fingal	2008-05-01	HDR PL	Static	12.7747	129
K26DD006c	Fingal	2008-05-01	HDR PL	Static	12.8103	130
K26DD006c	Fingal	2008-05-01	HDR PL	Static	12.8297	131
K26DD006c	Fingal	2008-05-01	HDR PL	Static	12.859	132
K26DD006c	Fingal	2008-05-01	HDR PL	Static	12.885	133
K26DD006c	Fingal	2008-05-01	HDR PL	Static	12.911	134
K26DD006c	Fingal	2008-05-01	HDR PL	Static	13.0057	135
K26DD006c	Fingal	2008-05-01	HDR PL	Static	13.0221	136
K26DD006c	Fingal	2008-05-01	HDR PL	Static	13.0516	137
K26DD006c	Fingal	2008-05-01	HDR PL	Static	13.114	138
K26DD006c	Fingal	2008-05-01	HDR PL	Static	13.2395	139
K26DD006c	Fingal	2008-05-01	HDR PL	Static	13.4226	140
K26DD006c	Fingal	2008-05-01	HDR PL	Static	13.6007	141
K26DD006c	Fingal	2008-05-01	HDR PL	Static	13.9174	142
K26DD006c	Fingal	2008-05-01	HDR PL	Static	14.0484	143
K26DD006c	Fingal	2008-05-01	HDR PL	Static	14.0104	144
K26DD006c	Fingal	2008-05-01	HDR PL	Static	14.0727	145
K26DD006c	Fingal	2008-05-01	HDR PL	Static	14.1943	146
K26DD006c	Fingal	2008-05-01	HDR PL	Static	14.2537	147
K26DD006c	Fingal	2008-05-01	HDR PL	Static	14.2818	148
K26DD006c	Fingal	2008-05-01	HDR PL	Static	14.2888	149
K26DD006c	Fingal	2008-05-01	HDR PL	Static	14.3239	150
K26DD006c	Fingal	2008-05-01	HDR PL	Static	14.3556	151
K26DD006c	Fingal	2008-05-01	HDR PL	Static	14.3943	152
K26DD006c	Fingal	2008-05-01	HDR PL	Static	14.4296	153
K26DD006c	Fingal	2008-05-01	HDR PL	Static	14.465	154
K26DD006c	Fingal	2008-05-01	HDR PL	Static	14.4863	155
K26DD006c	Fingal	2008-05-01	HDR PL	Static	14.5289	156
K26DD006c	Fingal	2008-05-01	HDR PL	Static	14.5466	157
K26DD006c	Fingal	2008-05-01	HDR PL	Static	14.5716	158
K26DD006c	Fingal	2008-05-01	HDR PL	Static	14.6036	159
K26DD006c	Fingal	2008-05-01	HDR PL	Static	14.6465	160
K26DD006c	Fingal	2008-05-01	HDR PL	Static	14.6608	161
K26DD006c	Fingal	2008-05-01	HDR PL	Static	14.7074	162
K26DD006c	Fingal	2008-05-01	HDR PL	Static	14.7505	163
K26DD006c	Fingal	2008-05-01	HDR PL	Static	14.79	164
K26DD006c	Fingal	2008-05-01	HDR PL	Static	14.8009	165
K26DD006c	Fingal	2008-05-01	HDR PL	Static	14.8478	166
K26DD006c	Fingal	2008-05-01	HDR PL	Static	14.9129	167
K26DD006c	Fingal	2008-05-01	HDR PL	Static	14.971	168
K26DD006c	Fingal	2008-05-01	HDR PL	Static	15.1498	169
K26DD006c	Fingal	2008-05-01	HDR PL	Static	15.1646	170
K26DD006c	Fingal	2008-05-01	HDR PL	Static	15.2603	171
K26DD006c	Fingal	2008-05-01	HDR PL	Static	15.3565	172
K26DD006c	Fingal	2008-05-01	HDR PL	Static	15.3973	173
K26DD006c	Fingal	2008-05-01	HDR PL	Static	15.4905	174
K26DD006c	Fingal	2008-05-01	HDR PL	Static	15.5018	175
K26DD006c	Fingal	2008-05-01	HDR PL	Static	15.513	176
K26DD006c	Fingal	2008-05-01	HDR PL	Static	15.5467	177
K26DD006c	Fingal	2008-05-01	HDR PL	Static	15.5655	178
K26DD006c	Fingal	2008-05-01	HDR PL	Static	15.6671	179
K26DD006c	Fingal	2008-05-01	HDR PL	Static	15.6897	180
K26DD006c	Fingal	2008-05-01	HDR PL	Static	15.7049	181
K26DD006c	Fingal	2008-05-01	HDR PL	Static	15.7276	182
K26DD006c	Fingal	2008-05-01	HDR PL	Static	15.7579	183
K26DD006c	Fingal	2008-05-01	HDR PL	Static	15.7959	184
K26DD006c	Fingal	2008-05-01	HDR PL	Static	15.8453	185
K26DD006c	Fingal	2008-05-01	HDR PL	Static	15.8644	186
K26DD006c	Fingal	2008-05-01	HDR PL	Static	15.8721	187
K26DD006c	Fingal	2008-05-01	HDR PL	Static	15.9179	188
K26DD006c	Fingal	2008-05-01	HDR PL	Static	15.96	189
K26DD006c	Fingal	2008-05-01	HDR PL	Static	16.0137	190
K26DD006c	Fingal	2008-05-01	HDR PL	Static	16.0407	191
K26DD006c	Fingal	2008-05-01	HDR PL	Static	16.0908	192
K26DD006c	Fingal	2008-05-01	HDR PL	Static	16.1526	193
K26DD006c	Fingal	2008-05-01	HDR PL	Static	16.2146	194
K26DD006c	Fingal	2008-05-01	HDR PL	Static	16.2263	195
K26DD006c	Fingal	2008-05-01	HDR PL	Static	16.2808	196
K26DD006c	Fingal	2008-05-01	HDR PL	Static	16.351	197
K26DD006c	Fingal	2008-05-01	HDR PL	Static	16.4059	198
K26DD006c	Fingal	2008-05-01	HDR PL	Static	16.4451	199
K26DD006c	Fingal	2008-05-01	HDR PL	Static	16.6465	200
K26DD006c	Fingal	2008-05-01	HDR PL	Static	16.7222	201
K26DD006c	Fingal	2008-05-01	HDR PL	Static	16.7621	202
K26DD006c	Fingal	2008-05-01	HDR PL	Static	16.7861	203
K26DD006c	Fingal	2008-05-01	HDR PL	Static	16.7982	204
K26DD006c	Fingal	2008-05-01	HDR PL	Static	16.8825	205
K26DD006c	Fingal	2008-05-01	HDR PL	Static	16.959	206
K26DD006c	Fingal	2008-05-01	HDR PL	Static	17.04	207
K26DD006c	Fingal	2008-05-01	HDR PL	Static	17.1009	208
K26DD006c	Fingal	2008-05-01	HDR PL	Static	17.1865	209
K26DD006c	Fingal	2008-05-01	HDR PL	Static	17.2356	210
K26DD006c	Fingal	2008-05-01	HDR PL	Static	17.3013	211
K26DD006c	Fingal	2008-05-01	HDR PL	Static	17.3384	212
K26DD006c	Fingal	2008-05-01	HDR PL	Static	17.3879	213
K26DD006c	Fingal	2008-05-01	HDR PL	Static	17.3962	214
K26DD006c	Fingal	2008-05-01	HDR PL	Static	17.4459	215
K26DD006c	Fingal	2008-05-01	HDR PL	Static	17.4957	216
K26DD006c	Fingal	2008-05-01	HDR PL	Static	17.5498	217
K26DD006c	Fingal	2008-05-01	HDR PL	Static	17.5915	218
K26DD006c	Fingal	2008-05-01	HDR PL	Static	17.6375	219
K26DD006c	Fingal	2008-05-01	HDR PL	Static	17.692	220
K26DD006c	Fingal	2008-05-01	HDR PL	Static	17.7425	221
K26DD006c	Fingal	2008-05-01	HDR PL	Static	17.793	222
K26DD006c	Fingal	2008-05-01	HDR PL	Static	17.8269	223
K26DD006c	Fingal	2008-05-01	HDR PL	Static	17.8692	224
K26DD006c	Fingal	2008-05-01	HDR PL	Static	17.9286	225
K26DD006c	Fingal	2008-05-01	HDR PL	Static	17.9967	226
K26DD006c	Fingal	2008-05-01	HDR PL	Static	18.048	227
K26DD006c	Fingal	2008-05-01	HDR PL	Static	18.0779	228
K26DD006c	Fingal	2008-05-01	HDR PL	Static	18.0994	229
K26DD006c	Fingal	2008-05-01	HDR PL	Static	18.1595	230
K26DD006c	Fingal	2008-05-01	HDR PL	Static	18.194	231
K26DD006c	Fingal	2008-05-01	HDR PL	Static	18.2544	232
K26DD006c	Fingal	2008-05-01	HDR PL	Static	18.2761	233
K26DD006c	Fingal	2008-05-01	HDR PL	Static	18.3108	234
K26DD006c	Fingal	2008-05-01	HDR PL	Static	18.3499	235
K26DD006c	Fingal	2008-05-01	HDR PL	Static	18.3934	236
K26DD006c	Fingal	2008-05-01	HDR PL	Static	18.437	237
K26DD006c	Fingal	2008-05-01	HDR PL	Static	18.4851	238
K26DD006c	Fingal	2008-05-01	HDR PL	Static	18.5114	239
K26DD006c	Fingal	2008-05-01	HDR PL	Static	18.5465	240
K26DD006c	Fingal	2008-05-01	HDR PL	Static	18.5992	241
K26DD006c	Fingal	2008-05-01	HDR PL	Static	18.6345	242
K26DD006c	Fingal	2008-05-01	HDR PL	Static	18.6478	243
K26DD006c	Fingal	2008-05-01	HDR PL	Static	18.6567	244
K26DD006c	Fingal	2008-05-01	HDR PL	Static	18.6656	245
K26DD006c	Fingal	2008-05-01	HDR PL	Static	18.7363	246
K26DD006c	Fingal	2008-05-01	HDR PL	Static	18.8163	247
K26DD006c	Fingal	2008-05-01	HDR PL	Static	18.8519	248
K26DD006c	Fingal	2008-05-01	HDR PL	Static	18.9011	249
K26DD006c	Fingal	2008-05-01	HDR PL	Static	18.9459	250
K26DD006c	Fingal	2008-05-01	HDR PL	Static	18.9459	251
K26DD005	Tower Hill	2008-05-01	HDR PL	Static	11.9282	5
K26DD005	Tower Hill	2008-05-01	HDR PL	Static	11.9221	6
K26DD005	Tower Hill	2008-05-01	HDR PL	Static	11.1695	7
K26DD005	Tower Hill	2008-05-01	HDR PL	Static	11.0014	8
K26DD005	Tower Hill	2008-05-01	HDR PL	Static	10.7797	9
K26DD005	Tower Hill	2008-05-01	HDR PL	Static	10.6411	10
K26DD005	Tower Hill	2008-05-01	HDR PL	Static	10.5263	11
[truncated: 6,353 more rows]
