# Supplementary material for: Late Holocene temperature variability in Tasmania inferred from borehole temperature data
Source: Copernicus journal article supplement (doi:10.5194/cp-13-559-2017), 2017-06-02
Supplement: Supplementary file 1 [file Supplementary data of Suman et al., 2017.pdf › Supplementary data of Suman et al., 2017/Supplementary data of Suman et al., 2017.pdf]

## Supplementary data

### Late Holocene temperature variability in Tasmania inferred from borehole temperature data

Asadusjjaman Suman<sup>1,2,3</sup>, Fiona Dyer<sup>1,3</sup> and Duanne White<sup>1,3</sup>

<sup>1</sup> Institute for Applied Ecology, University of Canberra, Canberra, Australia

<sup>2</sup> Department of Agricultural Engineering, Patuakhali Science and Technology University, Patuakhali, Bangladesh

<sup>3</sup> Murray-Darling Basin Futures Collaborative Research Network, University of Canberra, Canberra, Australia

*Correspondence to:* Asadusjjaman Suman (sumanpst@gmail.com)

**Table S1: Geologic, geographic and topographic features of the Tasmanian borehole network. \*Boreholes located in variable lithologies and formation \*\* Boreholes with very high model misfit and were not considered for regional average of GSTH. MG = Mathinna Group mudstones and siltstones, PSG = Parmeener Super Group upper (mudstones, siltstone) and lower (tillites) , JD = Jurassic Dolerite, TC = Tertiary Conglomerate.**

| Hole Name      | Depth, m | Elevation, m | Distance from coast, km | Ground Cover  | Slope | Aspect | Relief | MGA94 Northing | MGA94 Easting | Lithology | Thermal conductivity range | Sum sq misfit | Area misfit | Max dT in last 500 Years |
|----------------|----------|--------------|-------------------------|---------------|-------|--------|--------|----------------|---------------|-----------|----------------------------|---------------|-------------|--------------------------|
| Bangor         | 251      | 204          | 20                      | Cut<br>Forest | 5.0   | 173    | 135    | 5440427        | 508572        | MG        | 2.06-3.77                  | 0.28          | 3.65        | 1.79                     |
| Beaconsfield*  | 249      | 90           | 15                      | Forest        | 5.6   | 14     | 92     | 5439884        | 489244        | JD/PSG    | 2.28-2.34                  | 0.15          | 1.73        | 1.57                     |
| Ben Lomond     | 277      | 694          | 60                      | Forest        | 1.1   | 21     | 318    | 5402059        | 546613        | MG        | 3.87-4.41                  | 0.16          | 1.09        | 1.3                      |
| Bluestone Tier | 253      | 353          | 11                      | Forest        | 4.4   | 297    | 205    | 5300093        | 571901        | JD        | 2.07-2.18                  | 0.53          | 4.05        | 1.44                     |
| Cambridge      | 236      | 43           | 2                       | Grass         | 4.5   | 61     | 246    | 5261742        | 534378        | TC        | 1.93-2.22                  | 1.12          | 4.23        | 1.91                     |
| Charlton       | 251      | 242          | 42                      | Grass         | 1.0   | 34     | 65     | 5339821        | 545174        | JD        | 2.23-2.44                  | 2.31          | 16.24       | 1.62                     |

|              |     |     |    |        |     |     |     |         |        |              |           |       |       |      |
|--------------|-----|-----|----|--------|-----|-----|-----|---------|--------|--------------|-----------|-------|-------|------|
| Elizabeth    | 299 | 439 | 45 | Forest | 2.2 | 100 | 199 | 5356701 | 549501 | JD           | 1.99-2.27 | 0.82  | 8.53  | 1.1  |
| Epping       | 289 | 215 | 74 | Grass  | 1.7 | 95  | 75  | 5382606 | 533251 | JD           | 1.87-2.18 | 1.73  | 16.90 | 1.54 |
| Fingal*      | 251 | 577 | 17 | Forest | 6.1 | 87  | 337 | 5380292 | 589312 | JD/uPSG      | 0.68-2.53 | 3.61  | 10.18 | 1.85 |
| Frankford*   | 249 | 289 | 38 | Forest | 1.0 | 146 | 151 | 5416602 | 490171 | JD/uPSG      | 2.17-3.26 | 0.50  | 5.83  | 1.2  |
| Kingston     | 236 | 287 | 60 | Grass  | 4.5 | 314 | 88  | 5383093 | 547791 | JD           | 1.88-1.97 | 0.14  | 2.42  | 0.57 |
| Lake Leake   | 302 | 475 | 21 | Forest | 2.5 | 174 | 147 | 5338586 | 568510 | JD           | 1.96-2.18 | 0.65  | 4.78  | 1.63 |
| Lemont       | 246 | 333 | 36 | Forest | 4.4 | 295 | 151 | 5322898 | 547437 | JD           | 2.09-2.31 | 0.60  | 5.38  | 1.73 |
| Lisle        | 247 | 307 | 24 | Forest | 1.3 | 28  | 468 | 5437495 | 528218 | MG           | 2.32-4.8  | 0.10  | 1.37  | 1.03 |
| Macquarie*   | 221 | 295 | 68 | Grass  | 5.6 | 33  | 234 | 5359621 | 526048 | JD/uPSG      | 2.44-4.96 | 0.91  | 5.55  | 1.63 |
| Marion Bay*  | 250 | 81  | 2  | Grass  | 0.3 | 132 | 200 | 5260030 | 568645 | Tb, JD, uPSG | 2.02-2.93 | 2.55  | 10.59 | 1.78 |
| Mt Nicholas* | 248 | 398 | 20 | Forest | 7.0 | 335 | 471 | 5401440 | 587962 | IPSG/MG      | 1.85-4.8  | 3.40  | 14.99 | 1.8  |
| Murdunna**   | 245 | 139 | 5  | Forest | 8.0 | 344 | 161 | 5242021 | 573413 | JD           | 2.13-2.42 | 62.15 | 51.94 | 6.49 |
| Native Hut*  | 249 | 378 | 25 | Forest | 5.0 | 87  | 249 | 5284634 | 530061 | uPSG/JD      | 2.19-4.48 | 8.91  | 16.77 | 1.85 |
| Nunamara*    | 236 | 727 | 47 | Forest | 7.3 | 151 | 410 | 5415737 | 528262 | JD/IPSG      | 2.17-2.47 | 0.09  | 0.79  | 1.21 |
| Oatlands**   | 249 | 526 | 52 | Grass  | 5.0 | 23  | 115 | 5319896 | 531347 | JD           | 1.96-3.18 | 33.50 | 60.22 | 4.55 |
| Perth        | 253 | 200 | 61 | Grass  | 3.1 | 114 | 91  | 5399080 | 513500 | JD           | 2.07-2.41 | 1.73  | 10.31 | 1.86 |
| Rheban       | 241 | 79  | 4  | Grass  | 3.0 | 165 | 226 | 5279380 | 573260 | JD           | 2.05-2.23 | 0.85  | 3.09  | 1.71 |
| Rocherlea    | 250 | 49  | 40 | Grass  | 5.0 | 273 | 178 | 5420496 | 509171 | JD           | 1.97-2.25 | 0.67  | 7.68  | 0.9  |
| Runnymede    | 248 | 247 | 17 | Grass  | 2.7 | 224 | 85  | 5280238 | 546175 | JD           | 2.17-2.63 | 2.00  | 10.04 | 1.49 |
| Snow Hill    | 280 | 749 | 26 | Forest | 3.7 | 158 | 162 | 5358389 | 572873 | JD           | 1.99-2.25 | 0.51  | 3.42  | 1.59 |
| Sorell*      | 248 | 50  | 1  | Grass  | 1.7 | 90  | 81  | 5260122 | 550181 | IPSG/JD      | 2.2-3.76  | 3.20  | 14.79 | 1.92 |
| Swan         | 189 | 126 | 20 | Forest | 3.5 | 134 | 207 | 5359271 | 588108 | JD           | 1.98-2.13 | 0.14  | 1.16  | 1.5  |
| Temple Bar   | 296 | 353 | 57 | Forest | 5.2 | 289 | 162 | 5403592 | 530426 | JD           | 2.28-2.49 | 0.76  | 4.51  | 0.92 |
| Tiberias*    | 253 | 437 | 38 | Grass  | 0.5 | 266 | 119 | 5301300 | 531690 | uPSG         | 1.7-4.5   | 1.35  | 5.97  | 1.91 |
| Tooms**      | 263 | 414 | 16 | Forest | 0.3 | 8   | 177 | 5319894 | 567354 | JD           | 1.8-2.07  | 9.27  | 30.43 | 2.64 |
| Tower Hill   | 253 | 584 | 33 | Forest | 2.2 | 2   | 178 | 5399699 | 573964 | MG           | 4.06-5.23 | 0.16  | 3.72  | 0.83 |

|            |     |     |    |        |     |     |     |         |        |              |           |      |       |      |
|------------|-----|-----|----|--------|-----|-----|-----|---------|--------|--------------|-----------|------|-------|------|
| Tunbridge* | 252 | 252 | 57 | Grass  | 2.5 | 134 | 27  | 5339428 | 529875 | JD, uPSG, JD | 1.83-2.39 | 0.72 | 5.90  | 1.03 |
| Westbury   | 252 | 233 | 56 | Forest | 4.2 | 305 | 61  | 5396730 | 485940 | JD           | 2.07-2.21 | 0.53 | 6.64  | 0.84 |
| Weymouth   | 250 | 102 | 4  | Forest | 4.7 | 318 | 52  | 5457196 | 508409 | MG           | 2.95-4.02 | 0.21 | 3.36  | 0.7  |
| Woodsdale* | 252 | 365 | 22 | Forest | 1.7 | 70  | 146 | 5296499 | 552007 | uPSG/JD      | 2.28-4.54 | 3.39 | 17.07 | 1.81 |

Temperature vs depth profile of 33 boreholes with high quality data:

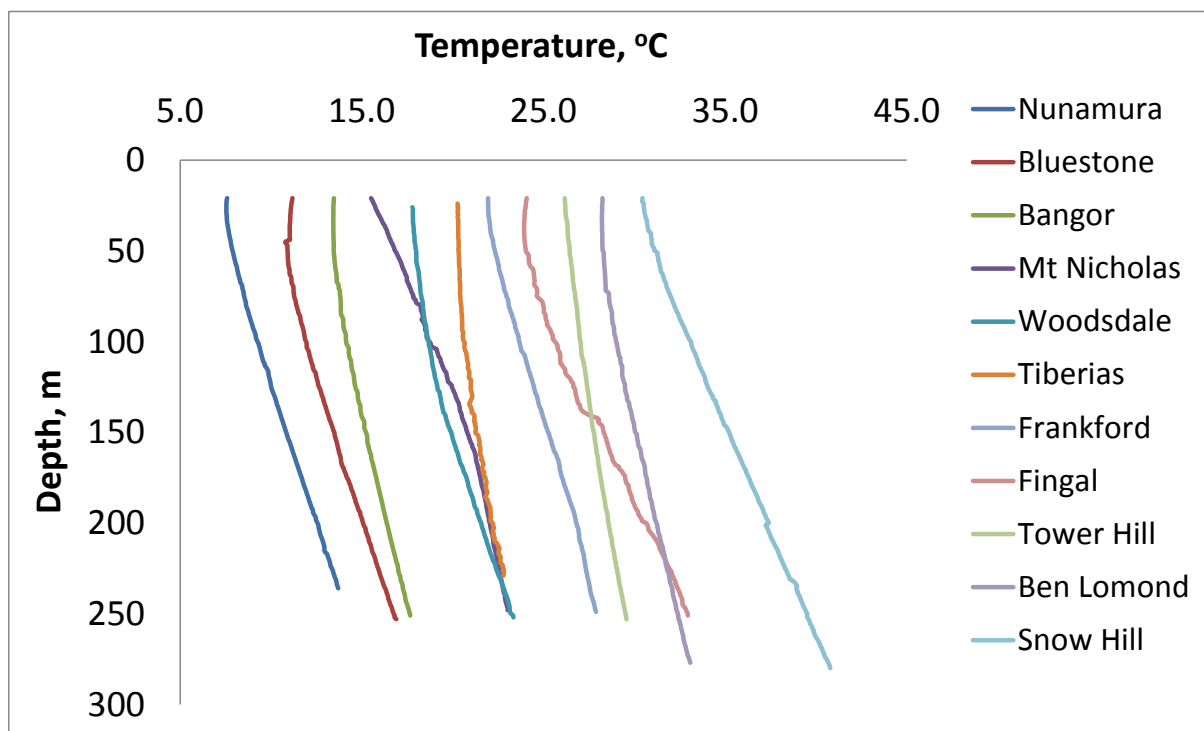

(a)

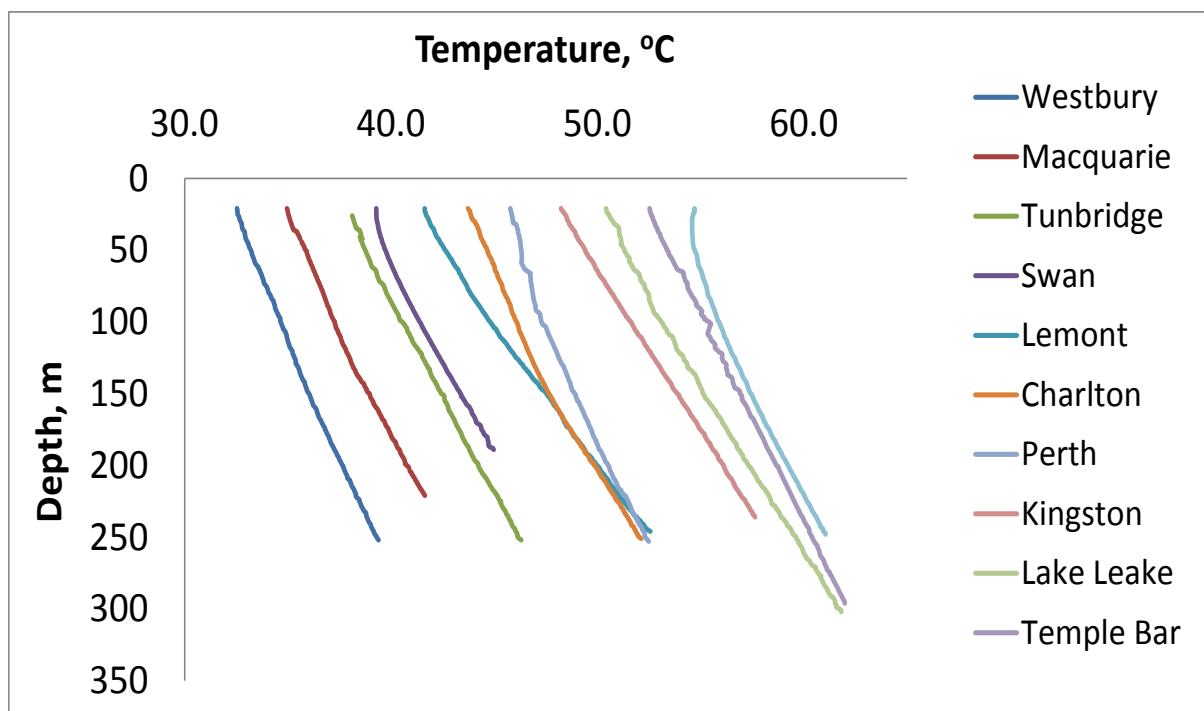

(b)

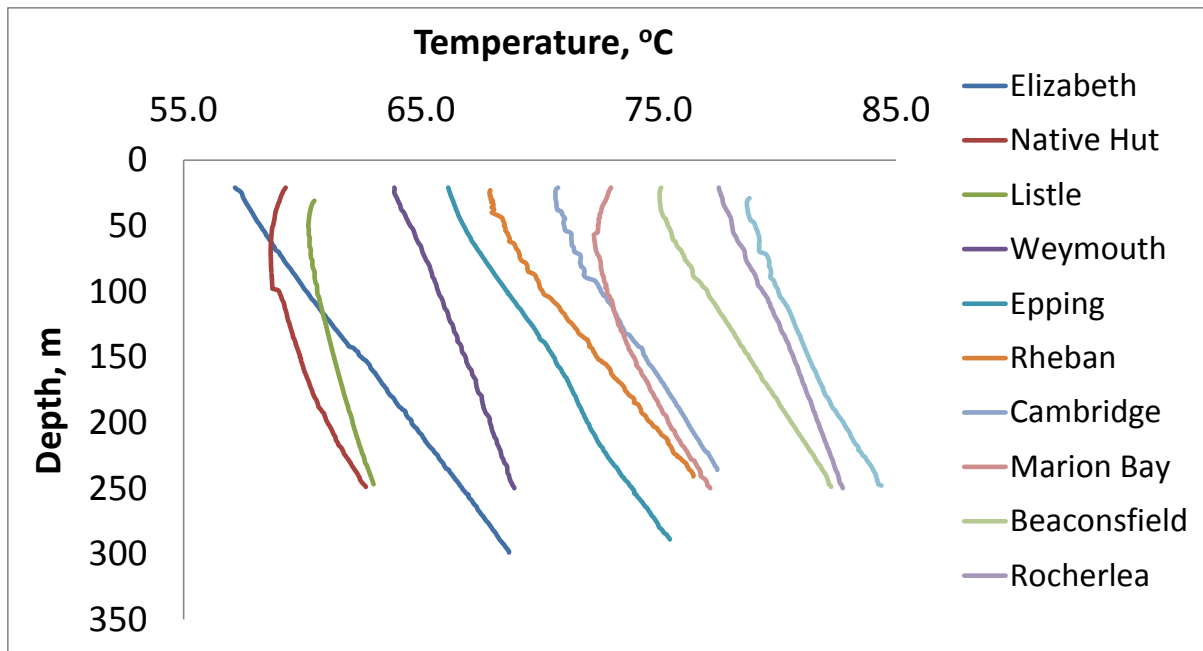

(c)

Fig. S1 (a-c) Downhole temperature depth profiles of thirty three boreholes, which are categorised as having high quality data. Profiles are offset by 2°C at the top for clarity.

Variation in temperature gradient within and between boreholes is largely a function of thermal conductivity, with the exception of the reduction in temperature rise.
