# Supplementary material for: Late Holocene temperature variability in Tasmania inferred from borehole temperature data
Source: Copernicus journal article supplement (doi:10.5194/cp-13-559-2017), 2017-06-02
Supplement: Supplementary file 2 [file KUTh_Tasmania Thermal Conductivity.xlsx]

## Sheet: Sheet1
Hole Number	Name	Sample Number	Depth Top (m)	Depth Base (m)	Lithology	Formation	Group	Method	Temperature (°C)	Sub-Sample Conductivity W/mK														Mean Conductivity (W/mK)	Uncertainty (+/- W/mK)	Mean Method	Comment
										A	Aθ(°)	B	Bθ(°)	C	Cθ(°)	D	Dθ1(°)	D	Dθ2(°)	D	Dθ3(°)	E	Eθ(°)
K26DD002	Lake Leake	KEN001	158.67	158.77	Dolerite	Tasmania Dolerite		Divided Bar	25	2.201		2.121		2.192										2.18	0.04	Harmonic
K26DD002	Lake Leake	KEN002	171.3	171.4	Dolerite	Tasmania Dolerite		Divided Bar	25	1.973		2.071		1.936										1.99	0.07	Harmonic
K26DD002	Lake Leake	KEN003	228.4	228.5	Dolerite	Tasmania Dolerite		Divided Bar	25	2.02		1.989		2.055										2.02	0.03	Harmonic
K26DD002	Lake Leake	KEN004	267.4	267.5	Dolerite	Tasmania Dolerite		Divided Bar	25	1.941		1.949		1.99										1.96	0.03	Harmonic
K26DD002	Lake Leake	KEN005	290	290.1	Dolerite	Tasmania Dolerite		Divided Bar	25	2.025		2.02		2.123										2.06	0.06	Harmonic
K26DD001	Tooms	KEN006	154.5	154.6	Dolerite	Tasmania Dolerite		Divided Bar	25	2.001		2.023		1.799										1.93	0.12	Harmonic
K26DD001	Tooms	KEN007	180.61	180.75	Dolerite	Tasmania Dolerite		Divided Bar	25	1.862		1.689		1.938										1.82	0.13	Harmonic
K26DD001	Tooms	KEN008	204.4	204.5	Dolerite	Tasmania Dolerite		Divided Bar	25	1.794		1.869		1.761										1.8	0.06	Harmonic
K26DD001	Tooms	KEN009	219.25	219.35	Dolerite	Tasmania Dolerite		Divided Bar	25	1.778		2.146		1.958										1.96	0.18	Harmonic
K26DD001	Tooms	KEN010	252.5	252.6	Dolerite	Tasmania Dolerite		Divided Bar	25	2.141		1.975		2.143								C		2.07	0.1	Harmonic
K26DD003	Snow	KEN011	168.2	168.31	Dolerite	Tasmania Dolerite		Divided Bar	25	1.855		2.103		2.032										1.99	0.13	Harmonic
K26DD003	Snow	KEN012	199	199.1	Dolerite	Tasmania Dolerite		Divided Bar	25	2.179		1.861		2.206										2.07	0.19	Harmonic
K26DD003	Snow	KEN013	221.4	221.5	Dolerite	Tasmania Dolerite		Divided Bar	25	1.986		2.237		1.923										2.04	0.17	Harmonic
K26DD003	Snow	KEN014	243.3	243.4	Dolerite	Tasmania Dolerite		Divided Bar	25	2.259		2.035		2.055										2.12	0.12	Harmonic
K26DD003	Snow	KEN015	267.45	267.55	Dolerite	Tasmania Dolerite		Divided Bar	25	2.345		2.256		2.16										2.25	0.09	Harmonic
K26DD004	Elizabeth	KEN016	156.7	156.85	Dolerite	Tasmania Dolerite		Divided Bar	25	2.029		1.932		2.003										1.99	0.05	Harmonic
K26DD004	Elizabeth	KEN017	171.7	171.81	Dolerite	Tasmania Dolerite		Divided Bar	25	1.94		2.136		1.977										2.01	0.1	Harmonic
K26DD004	Elizabeth	KEN018	202.35	202.37	Dolerite	Tasmania Dolerite		Divided Bar	25	2.444		2.047		2.44										2.27	0.26	Harmonic
K26DD004	Elizabeth	KEN019	252.7	252.8	Dolerite	Tasmania Dolerite		Divided Bar	25	2.125		2.135		2.174										2.15	0.03	Harmonic
K26DD004	Elizabeth	KEN020	283.72	283.81	Dolerite	Tasmania Dolerite		Divided Bar	25	2.071		2.125		2.13										2.11	0.03	Harmonic
K26DD005	Tower Hill	KEN021	162.8	163.05	Finely laminated grey to dk grey metasiltstone	Mathinna Beds		Divided Bar	25	5.21	15	4.97	20	5.53	10	4.16	85	5.47	5					5.23	0.28	Harmonic	Mean determined from samples A - C only
K26DD005	Tower Hill	KEN022	174.85	175.1	Finely laminated grey to dk grey metasiltstone	Mathinna Beds		Divided Bar	25	4.31	0	4.27	0	4.21	0	1.54	90	1.54	90					4.26	0.05	Harmonic	Mean determined from samples A - C only
K26DD005	Tower Hill	KEN023	204.23	204.48	Finely laminated grey to dk grey metasiltstone	Mathinna Beds		Divided Bar	25	5.3	5	4.98	5	5.26	5	3.61	55							5.18	0.17	Harmonic	Mean determined from samples A - C only
K26DD005	Tower Hill	KEN024	218.85	219.1	Finely laminated grey to dk grey metasiltstone	Mathinna Beds		Divided Bar	25	4.84		4.82		4.85		4.55								4.76	0.14	Harmonic
K26DD005	Tower Hill	KEN025	245.05	245.22	Finely laminated grey to dk grey metasiltstone	Mathinna Beds		Divided Bar	25	4.05	5	4.01	5	4.13	5	4.38	5						0.528697	4.06	0.06	Harmonic	Mean determined from samples A - C only
K26DD008	Temple Bar	KEN027	153.5	153.68	Dolerite	Tasmania Dolerite		Divided Bar	25	2.53		2.42		2.49										2.48	0.06	Harmonic
K26DD008	Temple Bar	KEN028	169.18	169.38	Dolerite	Tasmania Dolerite		Divided Bar	25	2.39		2.43		2.66										2.49	0.15	Harmonic
K26DD008	Temple Bar	KEN029	220	220.18	Dolerite	Tasmania Dolerite		Divided Bar	25	2.52		2.5		2.44										2.49	0.04	Harmonic
K26DD008	Temple Bar	KEN030	260.7	260.88	Dolerite	Tasmania Dolerite		Divided Bar	25	2.38		2.29		2.35										2.34	0.05	Harmonic
K26DD008	Temple Bar	KEN031	284.77	284.95	Dolerite	Tasmania Dolerite		Divided Bar	25	2.26		2.29		2.3										2.28	0.02	Harmonic
K26DD009	Epping	KEN032	147.7	147.9	Dolerite	Tasmania Dolerite		Divided Bar	25	2.09		2.09		2.1										2.09	0.01	Harmonic
K26DD009	Epping	KEN033	185.15	184.35	Dolerite	Tasmania Dolerite		Divided Bar	25	1.88		1.91		1.82										1.87	0.05	Harmonic
K26DD009	Epping	KEN034	198	198.2	Dolerite	Tasmania Dolerite		Divided Bar	25	1.94		1.96		2.01										1.97	0.03	Harmonic
K26DD009	Epping	KEN035	240.2	240.4	Dolerite	Tasmania Dolerite		Divided Bar	25	2.16		2.21		2.16										2.18	0.03	Harmonic
K26DD009	Epping	KEN036	267.7	267.88	Dolerite	Tasmania Dolerite		Divided Bar	25	2.1		2.08		2.12										2.1	0.02	Harmonic
K26DD007	Ben Lomond	KEN037	135.55	135.8	Finely laminated grey to dk grey metasiltstone/mudstone	Mathinna Beds		Divided Bar	25	3.87		3.88		4.07										3.94	0.11	Harmonic
K26DD007	Ben Lomond	KEN038	150.33	150.55	Finely laminated grey to dk grey metasiltstone/mudstone	Mathinna Beds		Divided Bar	25	4.28	20	4.23	15	4.19	15	4.03	15	4.76	5	2.59	70			4.24	0.05	Harmonic	Mean determined from samples A - C only
K26DD007	Ben Lomond	KEN039	176.37	176.56	Finely laminated grey to dk grey metasiltstone/mudstone	Mathinna Beds		Divided Bar	25	3.79	10	4.21	10	4.36	15	5	10	2.65	80	5.37	0			4.1	0.3	Harmonic	Mean determined from samples A - C only
K26DD007	Ben Lomond	KEN040	210.25	210.49	Finely laminated grey to dk grey metasiltstone/mudstone	Mathinna Beds		Divided Bar	25	3.88	25	3.68	30	4.08	20	4.72	5	3.08	45	3.53	40			3.87	0.2	Harmonic	Mean determined from samples A - C only
K26DD007	Ben Lomond	KEN041	247.55	247.8	Finely laminated grey to dk grey metasiltstone/mudstone	Mathinna Beds		Divided Bar	25	4.37		4.43		4.32										4.37	0.06	Harmonic
K26DD007	Ben Lomond	KEN042	265.1	265.3	Finely laminated grey to dk grey metasiltstone/mudstone	Mathinna Beds		Divided Bar	25	4.21		4.51		4.25		4.54						4.56		4.41	0.17	Harmonic
K26DD013	Kingston	KEN043	99.1	99.2	Dolerite	Tasmania Dolerite		Divided Bar	25	1.92		1.92		1.9										1.91	0.01	Harmonic	Depth error in .pdf corrected to sample
K26DD013	Kingston	KEN044	129.2	129.3	Dolerite	Tasmania Dolerite		Divided Bar	25	1.89		1.86		1.9										1.88	0.02	Harmonic
K26DD013	Kingston	KEN045	200.97	201.09	Dolerite	Tasmania Dolerite		Divided Bar	25	1.98		1.96		1.98										1.97	0.01	Harmonic
K26DD012	Woodsdale	KEN046	123.33	123.43	Light Grey Siltsone, mottled	Upper Parmeener	Unit 1? (Cygnet Coal Measures Correlate?)	Divided Bar	25	2.47		2.74		2.55										2.58	0.14	Harmonic
K26DD012	Woodsdale	KEN047	211.65	211.74	Dolerite	Tasmania Dolerite		Divided Bar	25	2.42		2.49		2.55										2.49	0.07	Harmonic
K26DD012	Woodsdale	KEN048	105.77	105.94	Quartz Sandstone	Upper Parmeener	Unit 2? (Ross Sandstone Correlate?)	Divided Bar	25	4.6		4.49		4.54										4.54	0.06	Harmonic
K26DD012	Woodsdale	KEN049	154.54	154.64	Dolerite	Tasmania Dolerite		Divided Bar	25	2.28		2.27		2.29										2.28	0.01	Harmonic
K26DD014	Tiberias	KEN050	166.69	166.79	Quartz Sandstone	Upper Parmeener	Unit 2? (Ross Sandstone Correlate?)	Divided Bar	25	4.55		4.18		4.82										4.5	0.32	Harmonic
K26DD014	Tiberias	KEN051	195.94	196.07	Light Grey Siltsone, mottled	Upper Parmeener	Unit 1? (Cygnet Coal Measures Correlate?)	Divided Bar	25	2.2		2.22		2.34										2.25	0.08	Harmonic
K26DD014	Tiberias	KEN052	124.74	124.87	Fine grained Qtz Sand (spotted)	Upper Parmeener	Unit 2? (Ross Sandstone Correlate?)	Divided Bar	25	3.28		3.47		3.15										3.3	0.16	Harmonic
K26DD014	Tiberias	KEN053	211.59	211.69	Carbonaceous Mudstone	Upper Parmeener	Unit 1? (Cygnet Coal Measures Correlate?)	Divided Bar	25	1.95		1.61		1.59										1.7	0.2	Harmonic
K26DD006c	Fingal	KEN054	87.1	87.2	Arkosic Sandstone	Upper Parmeener	Unit 4 (Triassic Coal Measures)	Divided Bar	25	1.85		1.83		1.87										1.85	0.02	Harmonic
K26DD006c	Fingal	KEN055	233.1	233.21	Arkosic Sandstone	Upper Parmeener	Unit 4 (Triassic Coal Measures)	Divided Bar	25	2.2		2.21		2.18										2.2	0.02	Harmonic
K26DD006c	Fingal	KEN056	183.7	183.83	Arkosic Sandstone	Upper Parmeener	Unit 4 (Triassic Coal Measures)	Divided Bar	25	2.54		2.7		2.27		2.66								2.53	0.019	Harmonic
K26DD006c	Fingal	KEN057	204.48	204.9	Carbonaceous Mud w/ Coal Laminae	Upper Parmeener	Unit 4 (Triassic Coal Measures)	Divided Bar	25	0.57		0.88		0.67										0.68	0.016	Harmonic
K26DD006c	Fingal	KEN058	144.77	144.85	Carbonaceous Mudstone	Upper Parmeener	Unit 4 (Triassic Coal Measures)	Divided Bar	25	1.03		1.07		1.05										1.05	0.02	Harmonic	Depth error in .pdf corrected to sample
K26DD006c	Fingal	KEN059	52.75	52.86	Dolerite	Tasmania Dolerite		Divided Bar	25	2.09		2.06		2.07										2.07	0.01	Harmonic
K26DD017	Mt Nicholas	KEN061	30.4	30.5	Grey siltstone	Lower Parmeener	Bogan Gap Group?	Divided Bar	25	2.09		2.14		2.11										2.11	0.03	Harmonic
K26DD017	Mt Nicholas	KEN062	63.9	64.05	Dark silt w/ coarse angular clasts	Lower Parmeener	Bogan Gap Group?	Divided Bar	25	1.91		1.69		1.96										1.85	0.14	Harmonic
K26DD017	Mt Nicholas	KEN063	82.17	82.27	Grey Muddy Limestone	Lower Parmeener	Cascades Group?	Divided Bar	25	2.5		2.58		2.69										2.59	0.1	Harmonic
K26DD017	Mt Nicholas	KEN064	200.57	200.7	Grey, fine-grained sandstone	Mathinna Beds		Divided Bar	25	4.82		4.73		4.86										4.8	0.07	Harmonic
K26DD017	Mt Nicholas	KEN065	107.85	107.95	Brown Muddy Limestone	Lower Parmeener	Cascades Group?	Divided Bar	25	2.95		2.8		2.82										2.85	0.08	Harmonic
K26DD017	Mt Nicholas	KEN066	144.8	144.92	Bioturbated, fine sandstone w/ coarse clasts	Lower Parmeener	Cascades Group?	Divided Bar	25	4.01		4.24		4.29										4.18	0.15	Harmonic
K26DD017	Mt Nicholas	KEN067	211.55	211.68	Grey fine-grained sandstone/siltstone with muddy laminae and quartz veining	Mathinna Beds		Divided Bar	25	4.79		4.72		4.64										4.72	0.08	Harmonic
K26DD011	Lemont	KEN068	115.02	115.13	Dolerite	Tasmania Dolerite		Divided Bar	25	2.28		2.1		2.09										2.15	0.11	Harmonic
K26DD011	Lemont	KEN069	161.8	161.9	Dolerite	Tasmania Dolerite		Divided Bar	25	2.16		2.06		2.06										2.09	0.06	Harmonic
K26DD011	Lemont	KEN070	208.56	208.67	Dolerite	Tasmania Dolerite		Divided Bar	25	2.33		2.28		2.31										2.31	0.02	Harmonic
K26DD011	Lemont	KEN071	225.35	225.45	Dolerite	Tasmania Dolerite		Divided Bar	25	2.23		2.34		2.34										2.3	0.06	Harmonic
K26DD015	Tunbridge	KEN072	120	120.19	Grey siltstone	Upper Parmeener?		Divided Bar	25	2.16		2.09		2.16										2.14	0.04	Harmonic
K26DD015	Tunbridge	KEN073	159.66	159.77	Dolerite	Tasmania Dolerite		Divided Bar	25	2.4		2.35		2.4										2.39	0.03	Harmonic
K26DD015	Tunbridge	KEN074	218.2	218.3	Dolerite	Tasmania Dolerite		Divided Bar	25	1.94		2.04		2.02										2	0.06	Harmonic
K26DD015	Tunbridge	KEN075	238.1	238.22	Dolerite	Tasmania Dolerite		Divided Bar	25	1.7		1.86		1.95										1.83	0.13	Harmonic	Depth error in .pdf corrected to sample
K26DD016	Macquarie	KEN076	110.4	110.55	Coarse sandstone feldspathic/lithic	Upper Parmeener?	Unit 2/3?	Divided Bar	25	4.95		4.95		4.99										4.96	0.02	Harmonic
K26DD016	Macquarie	KEN078	174.8	174.9	Grey black mudstone; bioturbations	Lower Parmeener	Bogan Gap Group?	Divided Bar	25	2.73		2.72		2.7										2.72	0.01	Harmonic
K26DD016	Macquarie	KEN079	204	204.12	Grey mudstone; bioturbations	Lower Parmeener	Bogan Gap Group?	Divided Bar	25	2.55		2.34		2.43										2.44	0.11	Harmonic
K26DD010b	Charlton	KEN080	30.86	31	Dolerite	Tasmania Dolerite		Divided Bar	25	2.33		2.23		2.23							2.26237	0.057735		2.26	0.06	Harmonic
K26DD010b	Charlton	KEN081	81.56	81.73	Dolerite	Tasmania Dolerite		Divided Bar	25	2.22		2.33		2.21							2.25204	0.0665833		2.25	0.06	Harmonic
K26DD010b	Charlton	KEN082	122.08	122.21	Dolerite	Tasmania Dolerite		Divided Bar	25	2.18		2.36		2.31							2.28077	0.0929157		2.28	0.09	Harmonic	Depth error in .pdf corrected to sample
K26DD010b	Charlton	KEN083	188.77	188.9	Dolerite	Tasmania Dolerite		Divided Bar	25	2.34		2.16		2.2			2.25503	0.0743992			2.23072	0.0945163		2.23	0.1	Harmonic
K26DD010b	Charlton	KEN084	228.67	228.83	Dolerite	Tasmania Dolerite		Divided Bar	25	2.13		2.32		2.31							2.24986	0.106927		2.25	0.11	Harmonic	Depth error in .pdf corrected to sample
K26DD018	Frankford	KEN085	116.85	117.05	Dolerite	Tasmania Dolerite		Divided Bar	25	2.43		2.4		2.24										2.35	0.1	Harmonic
K26DD018	Frankford	KEN086	186.03	186.23	Dolerite	Tasmania Dolerite		Divided Bar	25	2.17		2.19		2.15										2.17	0.02	Harmonic
K26DD018	Frankford	KEN087	208.81	208.94	Sandstone w/coarse angular red silt clasts	Upper Parmeener?		Divided Bar	25	2.68		3.01		3.41										3	0.37	Harmonic
K26DD018	Frankford	KEN088	245.04	245.22	Oxidised sandstone	Upper Parmeener?		Divided Bar	25	3.2		3.25		3.34										3.26	0.07	Harmonic
K26DD021	Nunamara	KEN089	74	74.14	Dolerite	Tasmania Dolerite		Divided Bar	25	2.45		2.55		2.43										2.47	0.06	Harmonic
K26DD021	Nunamara	KEN090	144	144.16	Dolerite	Tasmania Dolerite		Divided Bar	25	2.21		2.26		2.31										2.26	0.05	Harmonic
K26DD021	Nunamara	KEN091	224.23	224.4	Grey siltstone	Lower Parmeener?	Bogan Gap Group?	Divided Bar	25	2.12		2.18		2.22										2.17	0.05	Harmonic
K26DD021	Nunamara	KEN092	244.2	244.34	Grey siltstone	Lower Parmeener?	Bogan Gap Group?	Divided Bar	25	2.22		2.22		2.25										2.23	0.01	Harmonic
K26DD020	Perth	KEN093	129.99	130.15	Dolerite	Tasmania Dolerite		Divided Bar	25	2.17		2.18		2.14										2.16	0.02	Harmonic
K26DD020	Perth	KEN094	158.11	158.28	Dolerite	Tasmania Dolerite		Divided Bar	25	2.33		2.23		2.53										2.36	0.15	Harmonic
K26DD020	Perth	KEN095	177.09	177.22	Dolerite	Tasmania Dolerite		Divided Bar	25	2.45		2.4		2.38										2.41	0.03	Harmonic
K26DD020	Perth	KEN096	228	228.15	Dolerite	Tasmania Dolerite		Divided Bar	25	2.07		2.02		2.12										2.07	0.05	Harmonic
K26DD019	Westbury	KEN097	110.3	110.45	Dolerite	Tasmania Dolerite		Divided Bar	25	2.04		2.17		2.21										2.14	0.09	Harmonic
K26DD019	Westbury	KEN098	158.17	158.34	Dolerite	Tasmania Dolerite		Divided Bar	25	2.07		2.11		2.05										2.07	0.03	Harmonic
K26DD019	Westbury	KEN099	179.21	179.35	Dolerite	Tasmania Dolerite		Divided Bar	25	2.3		2.05		2.12										2.15	0.13	Harmonic
K26DD019	Westbury	KEN100	223.96	224.13	Dolerite	Tasmania Dolerite		Divided Bar	25	2.14		2.2		2.28										2.21	0.07	Harmonic
K26DD022	Bangor	KEN101	116.37	116.68	Carbonaceous Mudstone	Mathinna Beds		Divided Bar	25	3.3		3.38		3.43										3.37	0.06	Harmonic
K26DD022	Bangor	KEN060	145.43	145.59	Carbonaceous mudstone	Mathinna Beds		Divided Bar	25	3.31		3.4		3.38										3.36	0.05	Harmonic
K26DD022	Bangor	KEN102	163.08	163.23	Carbonaceous Mudstone	Mathinna Beds		Divided Bar	25	3.29		2.8		2.56										2.85	0.37	Harmonic
K26DD022	Bangor	KEN103	206.5	206.67	Carbonaceous Mudstone	Mathinna Beds		Divided Bar	25	1.76		2.23		2.25										2.06	0.28	Harmonic
K26DD022	Bangor	KEN104	225.86	226.06	Siliceous mudstone w/ calcite vein	Mathinna Beds		Divided Bar	25	3.81		3.73												3.77	0.05	Harmonic
K26DD024	Bluestone Tier	KEN105	114.8	115	Dolerite	Tasmania Dolerite		Divided Bar	25	2.03		2.12		2.07										2.07	0.05	Harmonic
K26DD024	Bluestone Tier	KEN106	175.2	175.52	Dolerite	Tasmania Dolerite		Divided Bar	25	2.19		2.17		2.18										2.18	0.01	Harmonic
K26DD024	Bluestone Tier	KEN107	203.24	203.45	Dolerite	Tasmania Dolerite		Divided Bar	25	2.21		2.22		2.17										2.2	0.03	Harmonic
K26DD023b	Swan	KEN108	161.49	161.71	Dolerite	Tasmania Dolerite		Divided Bar	25	2.07		1.93		1.95										1.98	0.07	Harmonic
K26DD023b	Swan	KEN109	219.05	219.26	Dolerite	Tasmania Dolerite		Divided Bar	25	2.1		2.14		2.09										2.11	0.03	Harmonic	Depth error in .pdf corrected to sample
K26DD023b	Swan	KEN110	279.22	279.41	Dolerite	Tasmania Dolerite		Divided Bar	25	2.15		2.06		2.16										2.13	0.05	Harmonic
K45DD027	Marion Bay	KEN111	103.2	103.17	Brown, fine-grained, arkosic, micaeous sandstone	Upper Parmeener?		Divided Bar	25	2.25		2.3		2.32										2.29	0.04	Harmonic
K45DD027	Marion Bay	KEN112	134.93	135.23	Quartz Sandstone	Upper Parmeener?		Divided Bar	25	2.98		2.98		2.83										2.93	0.09	Harmonic
K45DD027	Marion Bay	KEN113	154.23	154.48	Dolerite	Tasmania Dolerite		Divided Bar	25	2.29		2.22		2.28										2.26	0.04	Harmonic
K45DD027	Marion Bay	KEN114	214.7	214.93	Dolerite	Tasmania Dolerite		Divided Bar	25	2.22		2.22		2.22										2.22	0	Harmonic
K45DD027	Marion Bay	KEN115	238.55	238.8	Dolerite	Tasmania Dolerite		Divided Bar	25	2.01		2.02		2.04										2.02	0.02	Harmonic
K45DD029	Murdunna	KEN116	110.79	110.99	Dolerite	Tasmania Dolerite		Divided Bar	25	2.16		2.1		2.14										2.13	0.03	Harmonic
K45DD029	Murdunna	KEN117	152.62	152.8	Dolerite	Tasmania Dolerite		Divided Bar	25	2.13		2.28		2.33										2.25	0.1	Harmonic
K45DD029	Murdunna	KEN118	184.66	184.75	Dolerite	Tasmania Dolerite		Divided Bar	25	2.21		2.18		2.19										2.19	0.02	Harmonic
K45DD029	Murdunna	KEN119	200.48	200.73	Dolerite	Tasmania Dolerite		Divided Bar	25	2.28		2.31		2.34										2.31	0.03	Harmonic
K45DD029	Murdunna	KEN120	222.34	222.55	Dolerite	Tasmania Dolerite		Divided Bar	25	2.4		2.43		2.42										2.42	0.02	Harmonic
K45DD025	Rheban	KEN121	127.01	127.19	Dolerite	Tasmania Dolerite		Divided Bar	25	2.07		2.11		2.09										2.09	0.02	Harmonic
K45DD025	Rheban	KEN122	172.84	173.1	Dolerite	Tasmania Dolerite		Divided Bar	25	2.12		2.13		2.1										2.12	0.01	Harmonic
K45DD025	Rheban	KEN123	212.68	212.84	Dolerite	Tasmania Dolerite		Divided Bar	25	2.22		2.15		2.32										2.23	0.08	Harmonic
K45DD025	Rheban	KEN124	222.78	223.02	Dolerite	Tasmania Dolerite		Divided Bar	25	2.06		2.05		2.05										2.05	0.01	Harmonic
K26DD030	Sorell	KEN125	105.14	105.32	Coarse angular conglomerate	Lower Parmeener		Divided Bar	25	3.04		2.74		2.97										2.91	0.16	Harmonic
K26DD030	Sorell	KEN126	146.72	146.93	Black Pyritic Siltsone (silicified?)	Lower Parmeener		Divided Bar	25	3.12		3.11		3.16										3.13	0.03	Harmonic
K26DD030	Sorell	KEN127	167.92	168.08	Coarse angular Sandstone	Lower Parmeener		Divided Bar	25	3.83		3.72		3.73										3.76	0.06	Harmonic
K26DD030	Sorell	KEN128	200.78	200.95	Dolerite	Tasmania Dolerite		Divided Bar	25	2.18		2.18		2.24										2.2	0.03	Harmonic
K26DD030	Sorell	KEN129	241.43	241.65	Dolerite	Tasmania Dolerite		Divided Bar	25	2.59		2.46		2.48										2.51	0.07	Harmonic
K26DD031	Native Hut	KEN130	117.81	117.93	Fine sand; Qtz dominant	Upper Parmeener	Unit 2? (Ross Sandstone Correlate?)	Divided Bar	25	4.64		4.67		4.17										4.48	0.28	Harmonic
K26DD031	Native Hut	KEN131	125.4	125.51	Fine sand; Qtz dominant	Upper Parmeener	Unit 2? (Ross Sandstone Correlate?)	Divided Bar	25	4.26		4.54		4.32										4.37	0.15	Harmonic
K26DD031	Native Hut	KEN132	176.11	176.24	Fine silt/sand; Qtz dominant?	Upper Parmeener	Unit 2? (Ross Sandstone Correlate?)	Divided Bar	25	3.32		3.5		3.63										3.48	0.16	Harmonic
K26DD031	Native Hut	KEN133	189.92	190.03	Grey siltstone	Upper Parmeener	Unit 1? (Cygnet Coal Measures Correlate?)	Divided Bar	25	2.23		2.05		2.3										2.19	0.13	Harmonic
K26DD031	Native Hut	KEN134	221.82	221.97	Dolerite	Tasmania Dolerite		Divided Bar	25	2.38		2.4		2.4										2.4	0.01	Harmonic
K26DD031	Native Hut	KEN135	240.6	240.74	Dolerite	Tasmania Dolerite		Divided Bar	25	2.33		2.36		2.37										2.35	0.02	Harmonic
K26DD026	Runnymede	KEN136	92.25	92.4	Dolerite	Tasmania Dolerite		Divided Bar	25	2.61		2.67		2.61										2.63	0.03	Harmonic
K26DD026	Runnymede	KEN137	119.66	119.81	Dolerite	Tasmania Dolerite		Divided Bar	25	2.11		2.81		2.62										2.48	0.36	Harmonic
K26DD026	Runnymede	KEN138	151.98	152.13	Dolerite	Tasmania Dolerite		Divided Bar	25	2.47		2.48		2.49										2.48	0.01	Harmonic
K26DD026	Runnymede	KEN139	203.23	203.35	Dolerite	Tasmania Dolerite		Divided Bar	25	2.18		2.14		2.18				2.36915						2.17	0.02	Harmonic
K26DD026	Runnymede	KEN140	235.82	235.96	Dolerite	Tasmania Dolerite		Divided Bar	25	2.18		2.17		2.15				0.240264				2.37154	0.20647	2.17	0.02	Harmonic
K26DD032	Cambridge	KEN141	106.76	106.91	Grey polymict conglomerate	Tertiary		Divided Bar	25	2.23		2.19		2.26										2.22	0.04	Harmonic	Depth error in .pdf corrected to sample
K26DD032	Cambridge	KEN142	137.64	137.82	Grey polymict conglomerate	Tertiary		Divided Bar	25	1.87		1.93		2										1.93	0.06	Harmonic
K26DD032	Cambridge	KEN143	178.05	178.15	Dolerite clast from grey polymict conglomerate	Tertiary		Divided Bar	25	2.1		1.92		1.91										1.97	0.1	Harmonic	Depth error in .pdf corrected to sample
K26DD032	Cambridge	KEN144	201.68	201.8	Grey polymict conglomerate	Tertiary		Divided Bar	25	1.91		2.03		2.03										1.99	0.07	Harmonic
K26DD032	Cambridge	KEN145	221.04	221.16	Grey polymict conglomeratic sandstone	Tertiary		Divided Bar	25	2		1.85		2.05										1.96	0.1	Harmonic
K26DD034	Beaconsfield	KEN146	126.01	126.13	Dolerite	Tasmania Dolerite		Divided Bar	25	2.3		2.27		2.28										2.28	0.01	Harmonic
K26DD034	Beaconsfield	KEN147	177.13	177.29	Dolerite	Tasmania Dolerite		Divided Bar	25	2.32		2.35		2.36										2.34	0.02	Harmonic
K26DD034	Beaconsfield	KEN148	223.26	223.4	Dolerite	Tasmania Dolerite		Divided Bar	25	2.31		2.34		2.31										2.28	0.01	Harmonic
K26DD034	Beaconsfield	KEN149	248.6	248.74	Arkosic Sandstone	?Upper Parmeener		Divided Bar	25	2.9		2.87		2.69										2.34	0.02	Harmonic
K26DD036	Listle	KEN150	115.06	115.23	Siltstone	Mathinna Beds		Divided Bar	25	4.33		4		4.22										2.32	0.01	Harmonic
K26DD036	Listle	KEN151	143.4	143.54	Dark grey - black, fine-grained meta sand/siltstone	Mathinna Beds		Divided Bar	25	4.13		4.2		4.16										2.82	0.11	Harmonic	Depth error in .pdf corrected to sample
K26DD036	Listle	KEN152	151.48	151.62	Silicified meta sand/siltstone; abundant Qtz veining	Mathinna Beds		Divided Bar	25	4.85		4.87		4.7										4.18	0.17	Harmonic
K26DD036	Listle	KEN153	207.44	207.55	Grey-black banded meta-Siltstone	Mathinna Beds		Divided Bar	25	3.19		3.2		3.14										4.16	0.04	Harmonic
K26DD036	Listle	KEN154	240.48	240.59	Grey-black banded meta-Siltstone	Mathinna Beds		Divided Bar	25	3.56		3.5		3.54										4.8	0.09	Harmonic
K26DD037b	Oatlands	KEN155	115.6	115.7	Dolerite	Tasmania Dolerite		Divided Bar	25	1.93		1.93												3.18	0.03	Harmonic
K26DD037b	Oatlands	KEN156	136.51	136.66	Dolerite	Tasmania Dolerite		Divided Bar	25	1.95		1.97		1.96										1.96	0.01	Harmonic
K26DD037b	Oatlands	KEN157	191.1	191.21	Dolerite	Tasmania Dolerite		Divided Bar	25	2.06		2.03		2.22										2.1	0.11	Harmonic
K26DD037b	Oatlands	KEN158	226.9	227.06	Dolerite	Tasmania Dolerite		Divided Bar	25	2.08		2.06		2.07										2.07	0.01	Harmonic
K26DD033	Rocherlea	KEN159	130.04	130.17	Dolerite	Tasmania Dolerite		Divided Bar	25	1.98		1.95		1.97										1.97	0.01	Harmonic
K26DD033	Rocherlea	KEN160	181.03	181.12	Dolerite	Tasmania Dolerite		Divided Bar	25	2.2		2.22		2.15										2.19	0.04	Harmonic
K26DD033	Rocherlea	KEN161	232.4	232.5	Dolerite	Tasmania Dolerite		Divided Bar	25	2.18		2.27		2.31										2.25	0.07	Harmonic
K26DD035	Weymouth	KEN162	120.51	120.64	Carbonaceous Mudstone	Mathinna Beds		Divided Bar	25	2.85		3.01		2.98										2.95	0.09	Harmonic
K26DD035	Weymouth	KEN163	155.16	155.32	Carbonaceous Mudstone	Mathinna Beds		Divided Bar	25	3.69		3.61		3.54										3.61	0.08	Harmonic
K26DD035	Weymouth	KEN164	178.92	179.11	Carbonaceous Mudstone	Mathinna Beds		Divided Bar	25	3.97		3.94		3.87										3.93	0.05	Harmonic
K26DD035	Weymouth	KEN165	195.1	195.23	Carbonaceous Mudstone	Mathinna Beds		Divided Bar	25	3.23		3.1		3.16										3.16	0.07	Harmonic
K26DD035	Weymouth	KEN166	222.51	222.68	Grey-black banded mudstone w/ mod. slatey cleavage	Mathinna Beds		Divided Bar	25	4.09		4.11		3.86										4.02	0.14	Harmonic
