# Supplementary material for: Late Holocene temperature variability in Tasmania inferred from borehole temperature data
Source: Copernicus journal article supplement (doi:10.5194/cp-13-559-2017), 2017-06-02
Supplement: Supplementary file [file cp-13-559-2017-supplement-title-page.pdf › cp-13-559-2017-supplement-title-page.pdf]

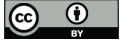

## *Supplement of*

# **Late Holocene temperature variability in Tasmania inferred from borehole temperature data**

**Asadusjjaman Suman et al.**

*Correspondence to:* Asadusjjaman Suman ([sumanpstu@gmail.com](mailto:sumanpstu@gmail.com))

- [cp-13-559-2017-supplement-title-page.pdf](#)
- Supplementary data of Suman et al., 2017
  - [KUTh\\_Tasmania Borehole Temperature Data.xlsx](#)
  - [KUTh\\_Tasmania Thermal Conductivity.xlsx](#)
  - [Supplementary data of Suman et al., 2017.pdf](#)

The copyright of individual parts of the supplement might differ from the CC BY 3.0 License.
